# Supplementary material for: Heteroresistance to cefiderocol in carbapenem-resistant Acinetobacter baumannii in the CREDIBLE-CR study was not linked to clinical outcomes: a post hoc analysis
Source: PubMed Central journal article supplement (PMC10714777; doi:10.1128/spectrum.02371-23), 2023-11-15

Heteroresistance to cefiderocol in carbapenem-resistant *Acinetobacter baumannii* in the CREDIBLE-CR study was not linked to clinical outcomes: a post-hoc analysis

Christopher Longshaw, Anne Santerre Henriksen, Dana Dressel, Michelle Malysa, Christian Silvestri, Miki Takemura, Yoshinori Yamano, Takamichi Baba, Christine M Slover

## **Supplementary Figures**

**Supplementary Figures S1.1–S1.38.** Growth profiles of 38 carbapenem-resistant *Acinetobacter calcoaceticus-baumannii* complex isolates from the CREDIBLE-CR study by PAP method

Isolate 1651842

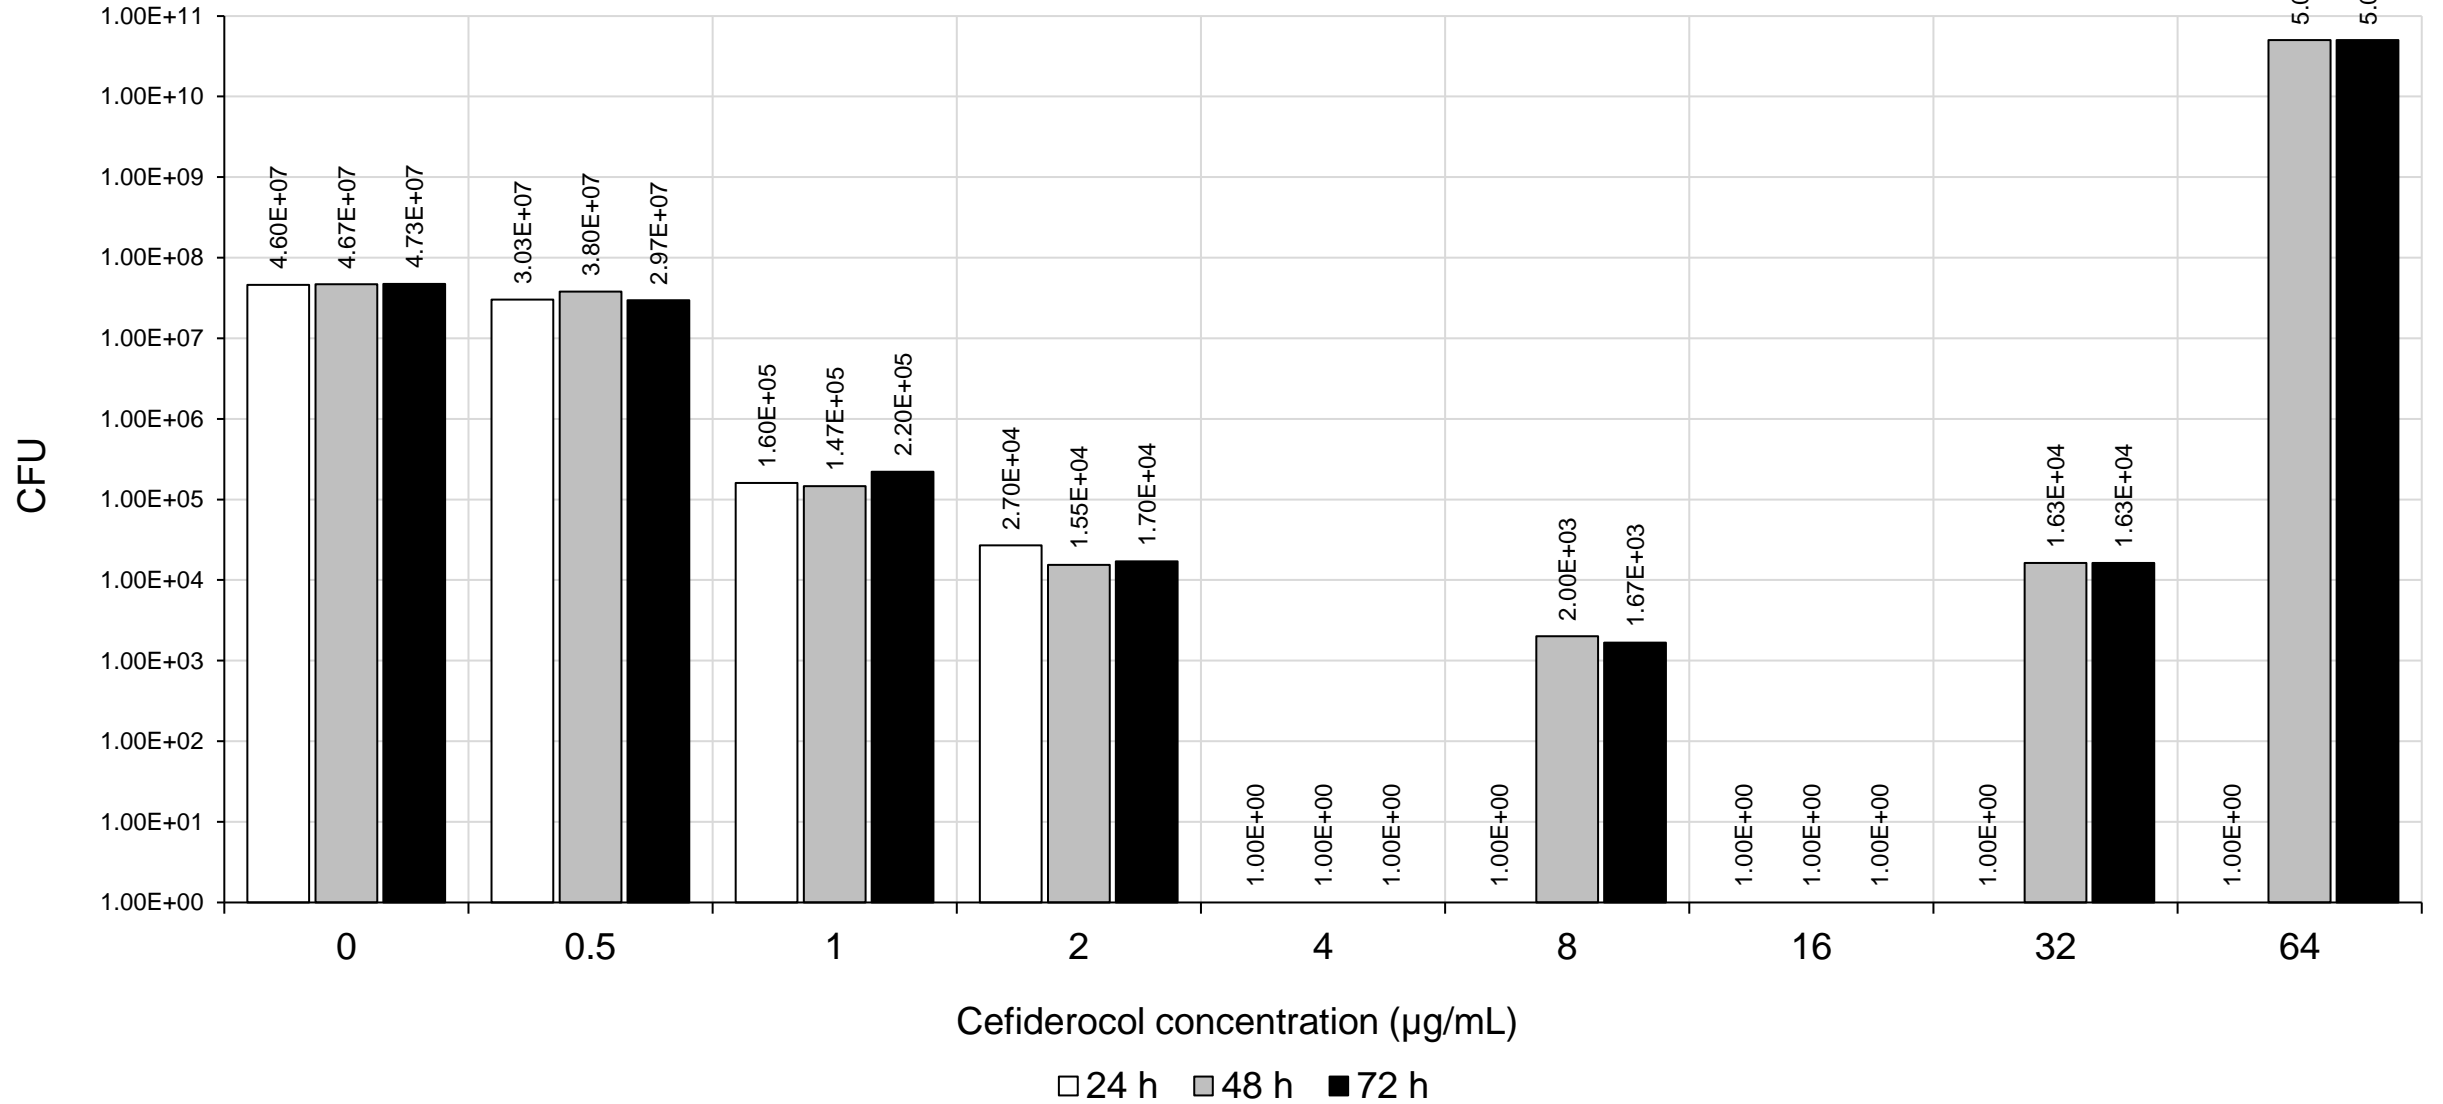

CFU, colony-forming unit; PAP, population analysis profiling; R, resistant.

Isolate 1657586

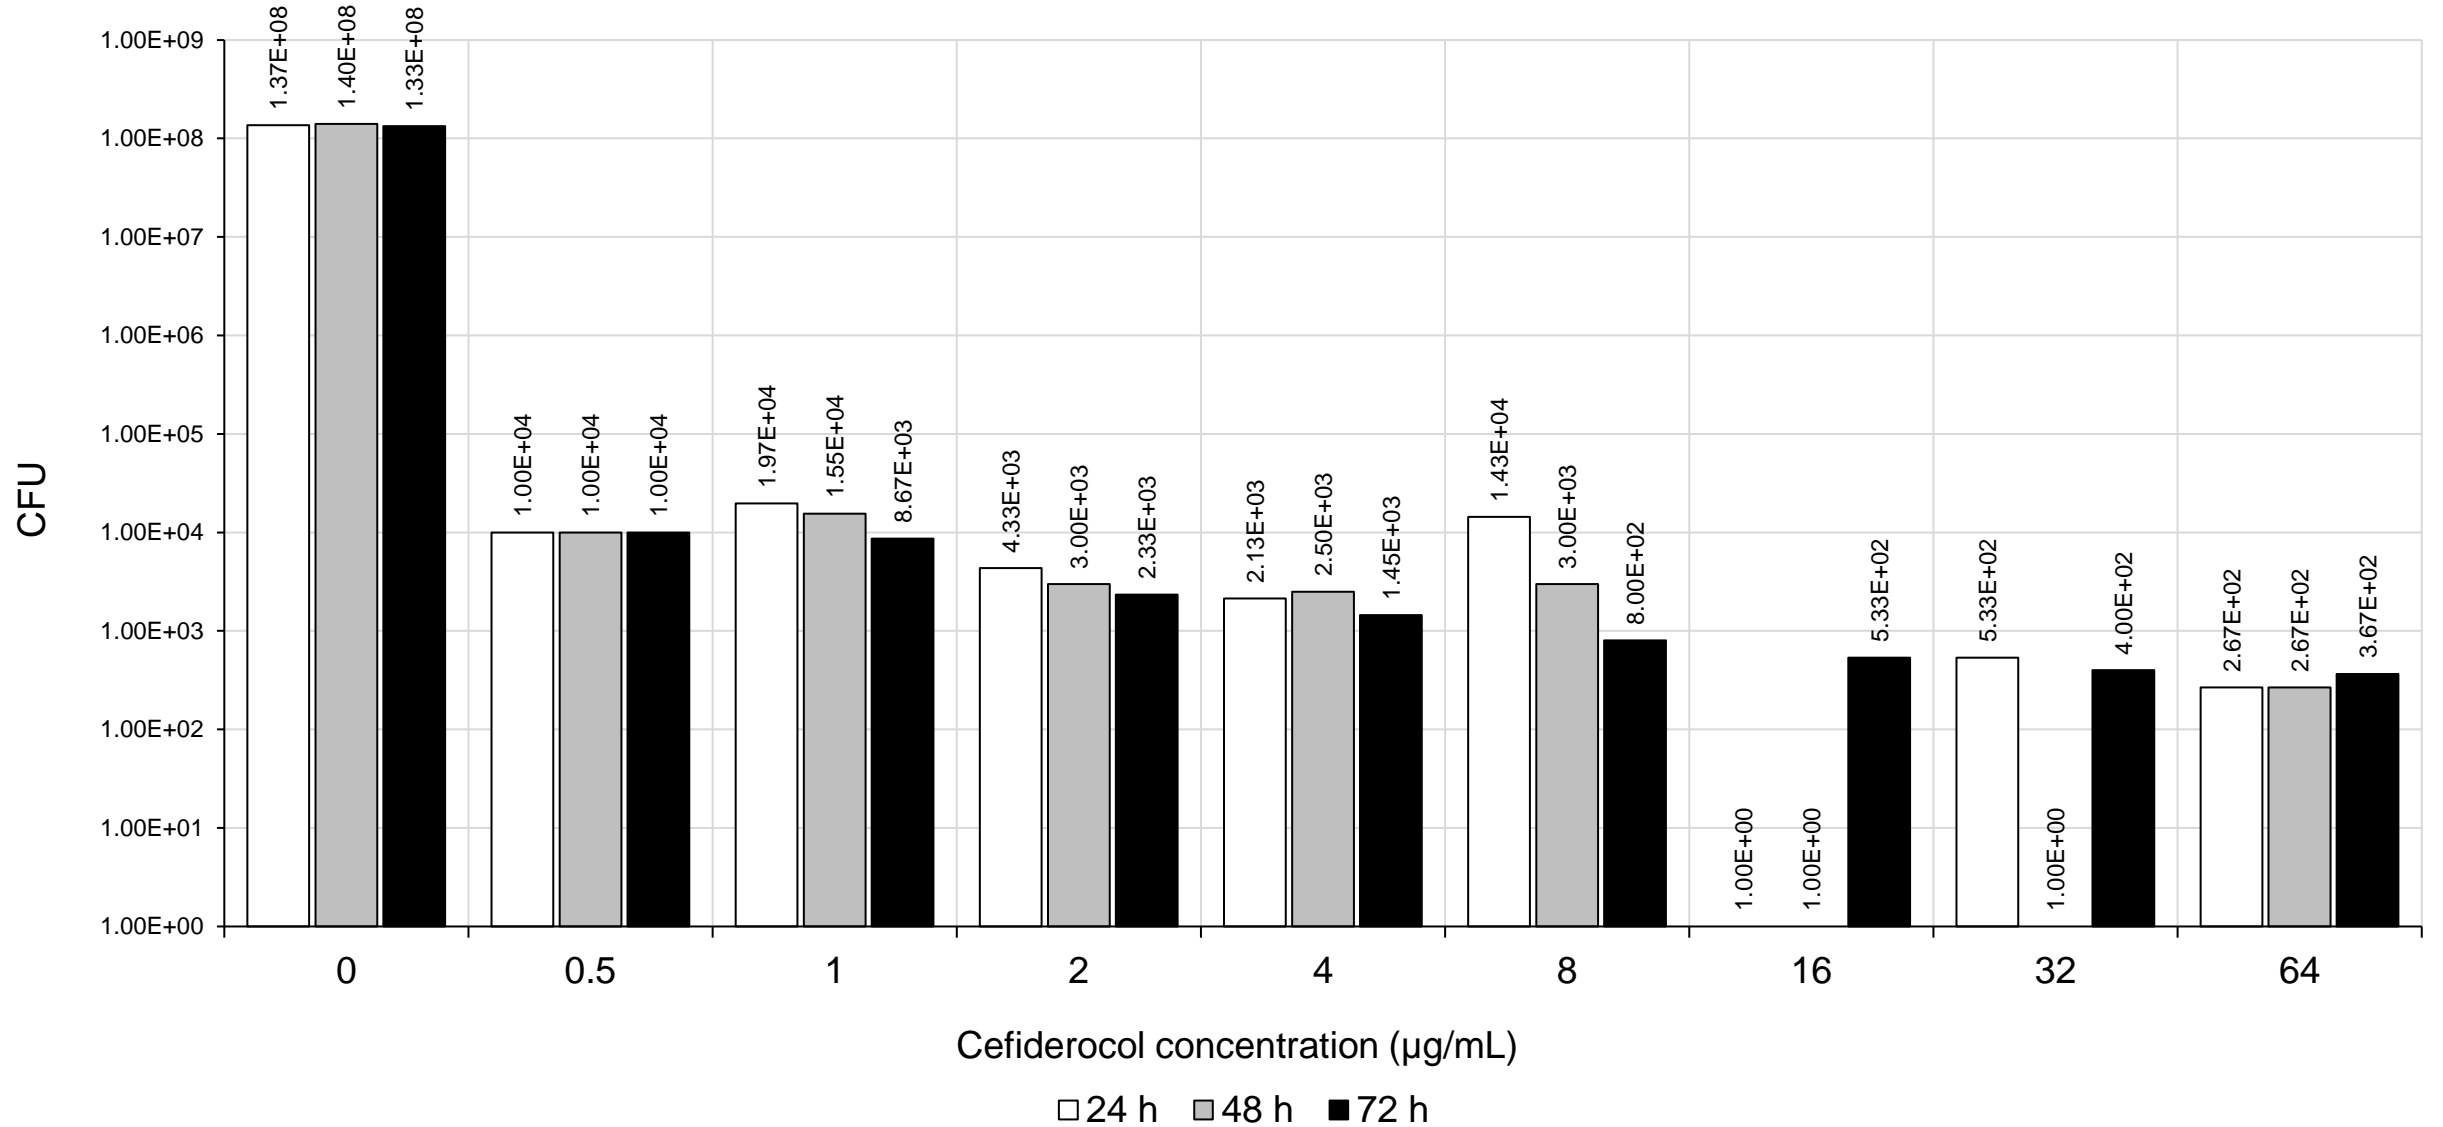

CFU, colony-forming unit; HR, heteroresistant; PAP, population analysis profiling.

Supplementary Fig S1.2.

Growth profile of carbapenem-resistant *Acinetobacter calcoaceticus-baumannii* complex by PAP method

Isolate 1684238

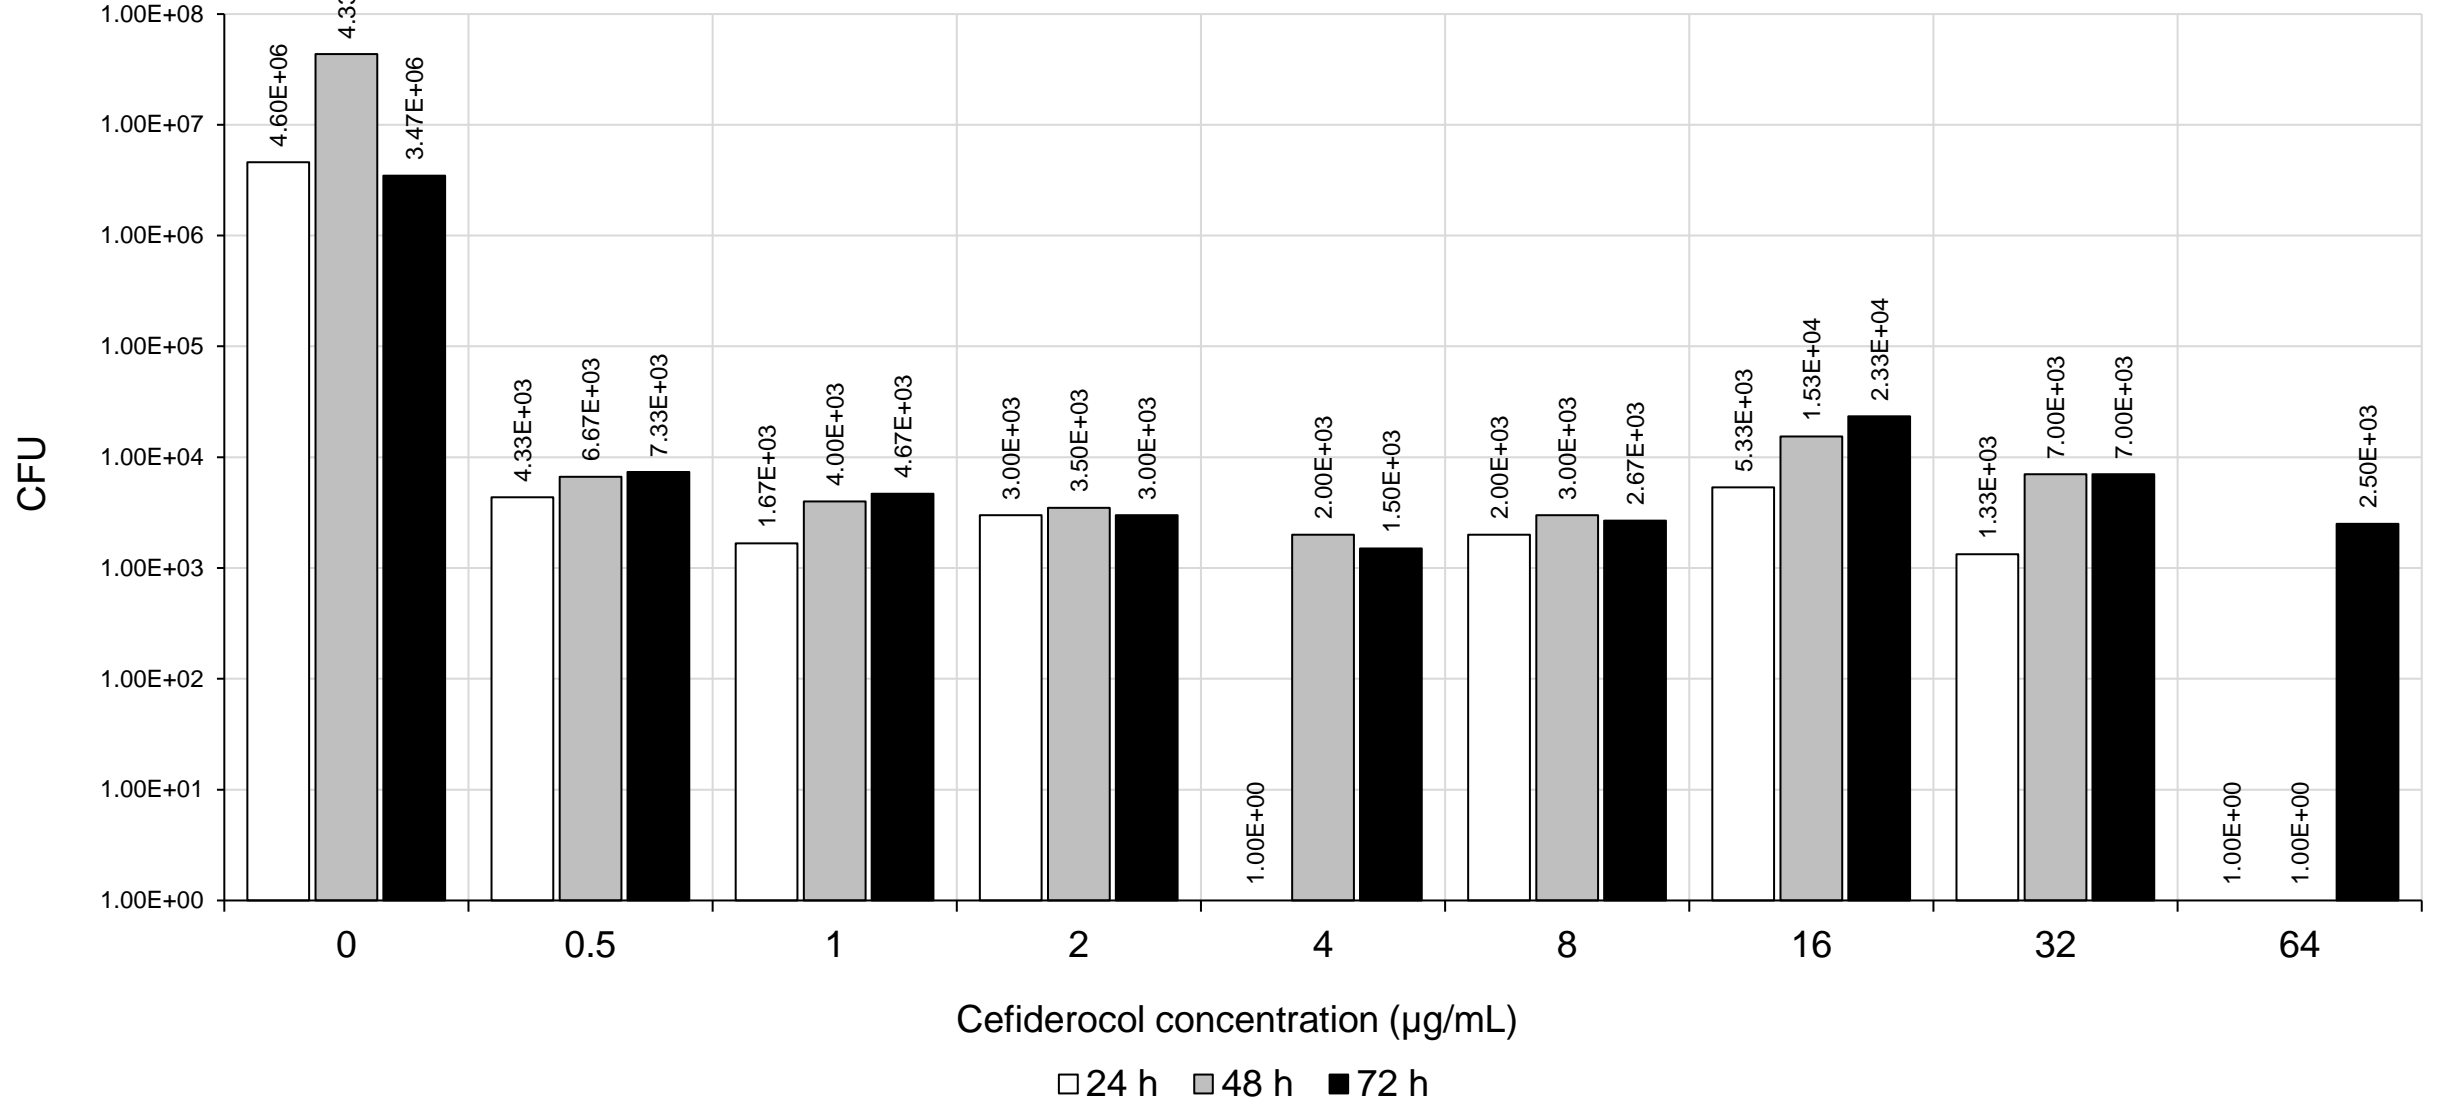

CFU, colony-forming unit; HR, heteroresistant; PAP, population analysis profiling.

Supplementary Fig S1.3.

Growth profile of carbapenem-resistant *Acinetobacter calcoaceticus-baumannii* complex by PAP method

Isolate 1688329

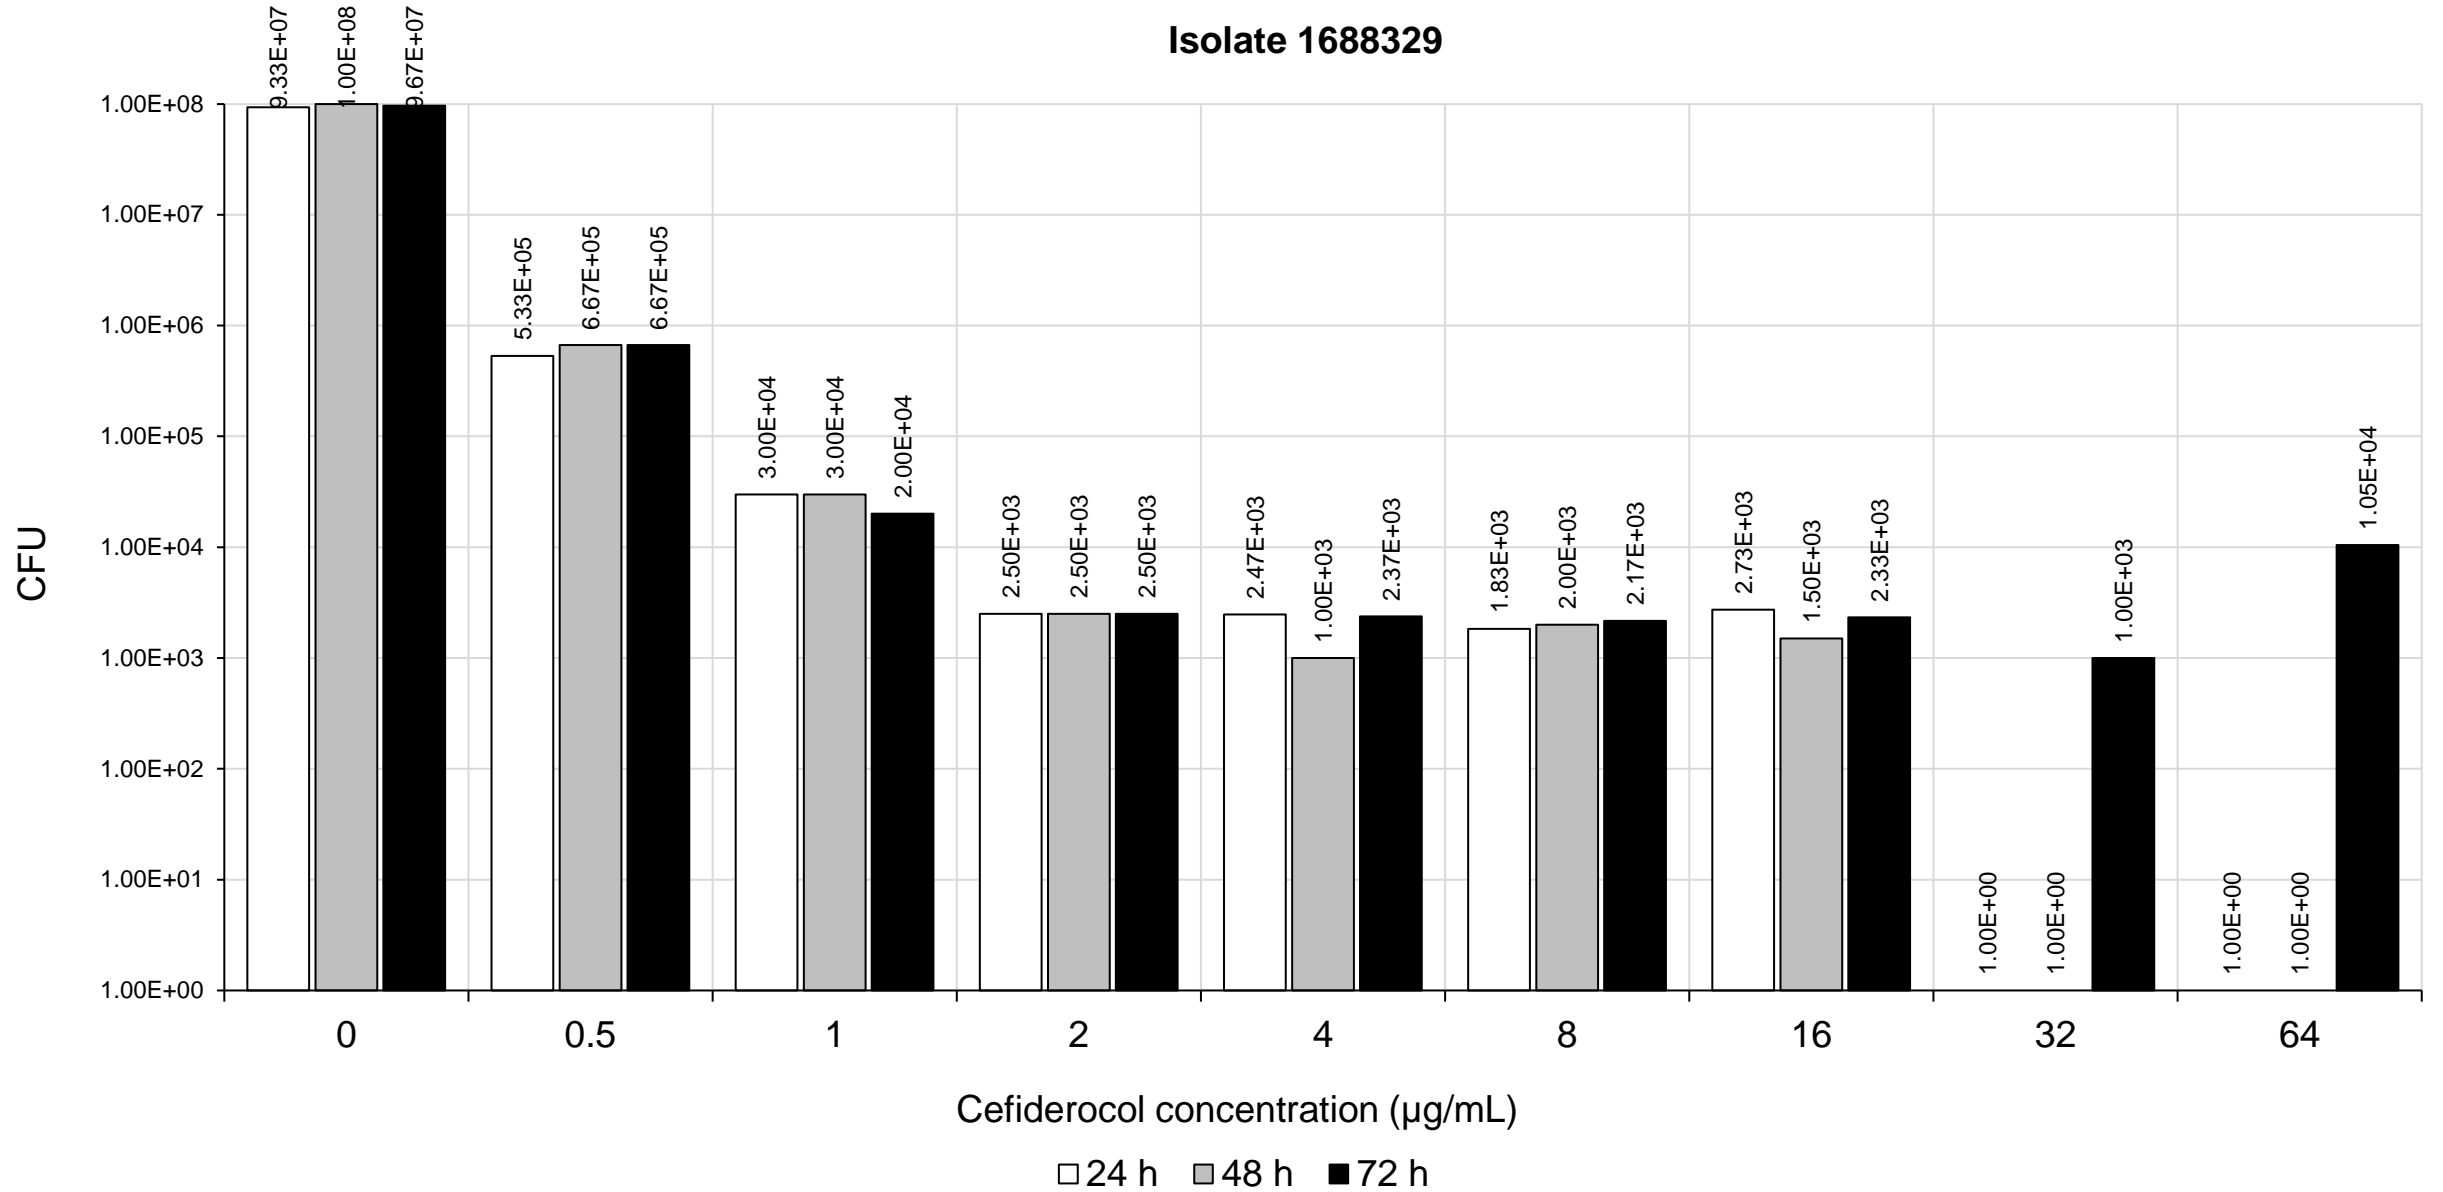

CFU, colony-forming unit; HR, heteroresistant; PAP, population analysis profiling.

Supplementary Fig S1.4.

Growth profile of carbapenem-resistant *Acinetobacter calcoaceticus-baumannii* complex by PAP method

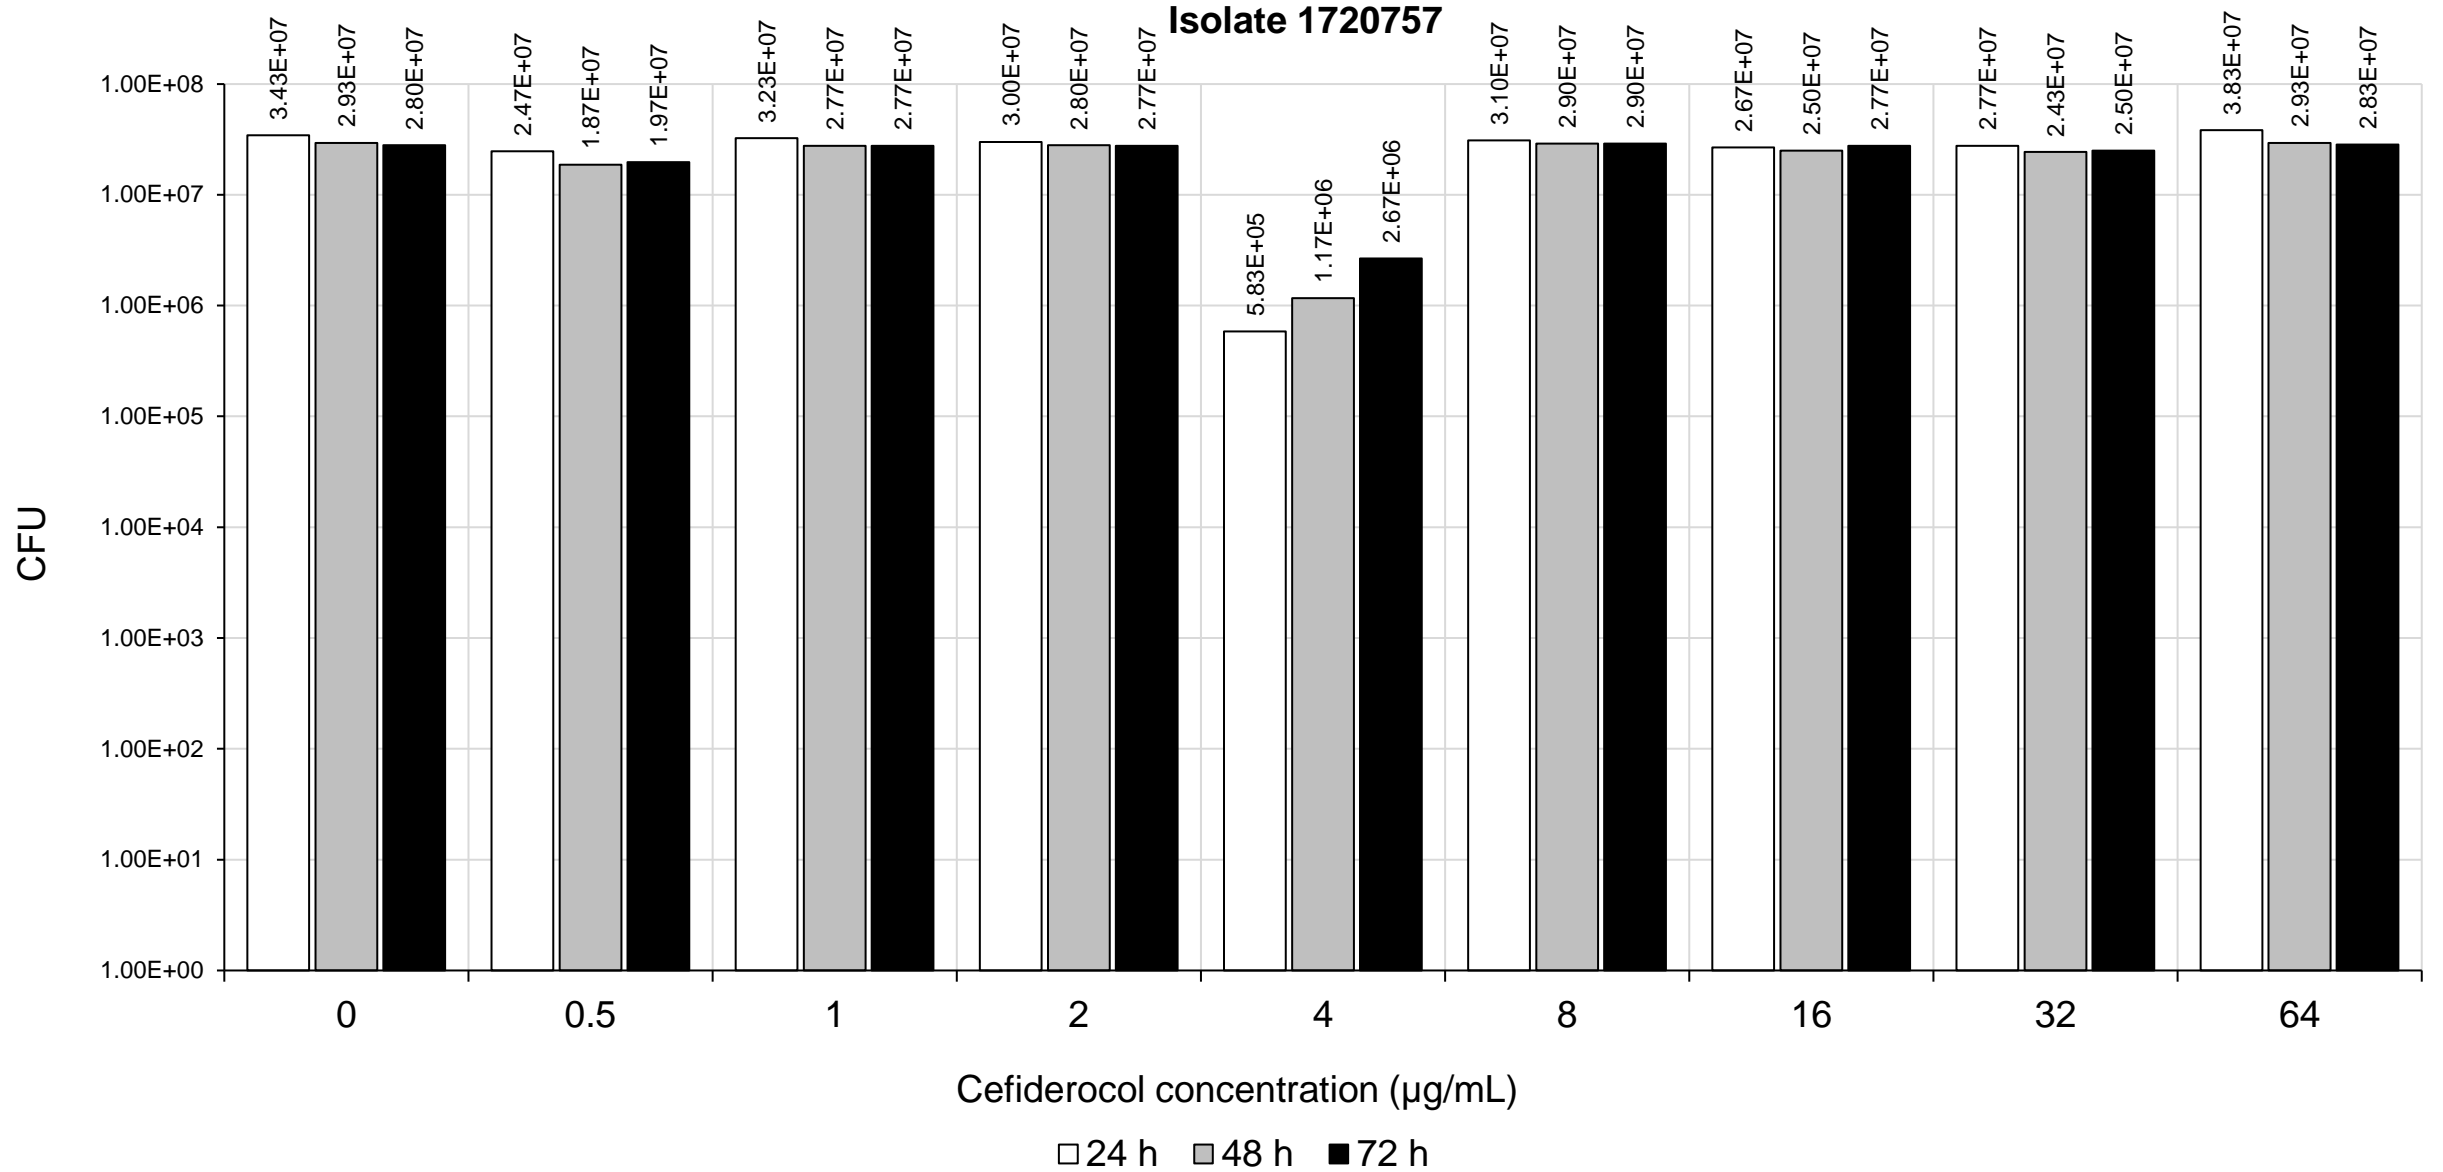

CFU, colony-forming unit; PAP, population analysis profiling; R, resistant.

Isolate 1736127

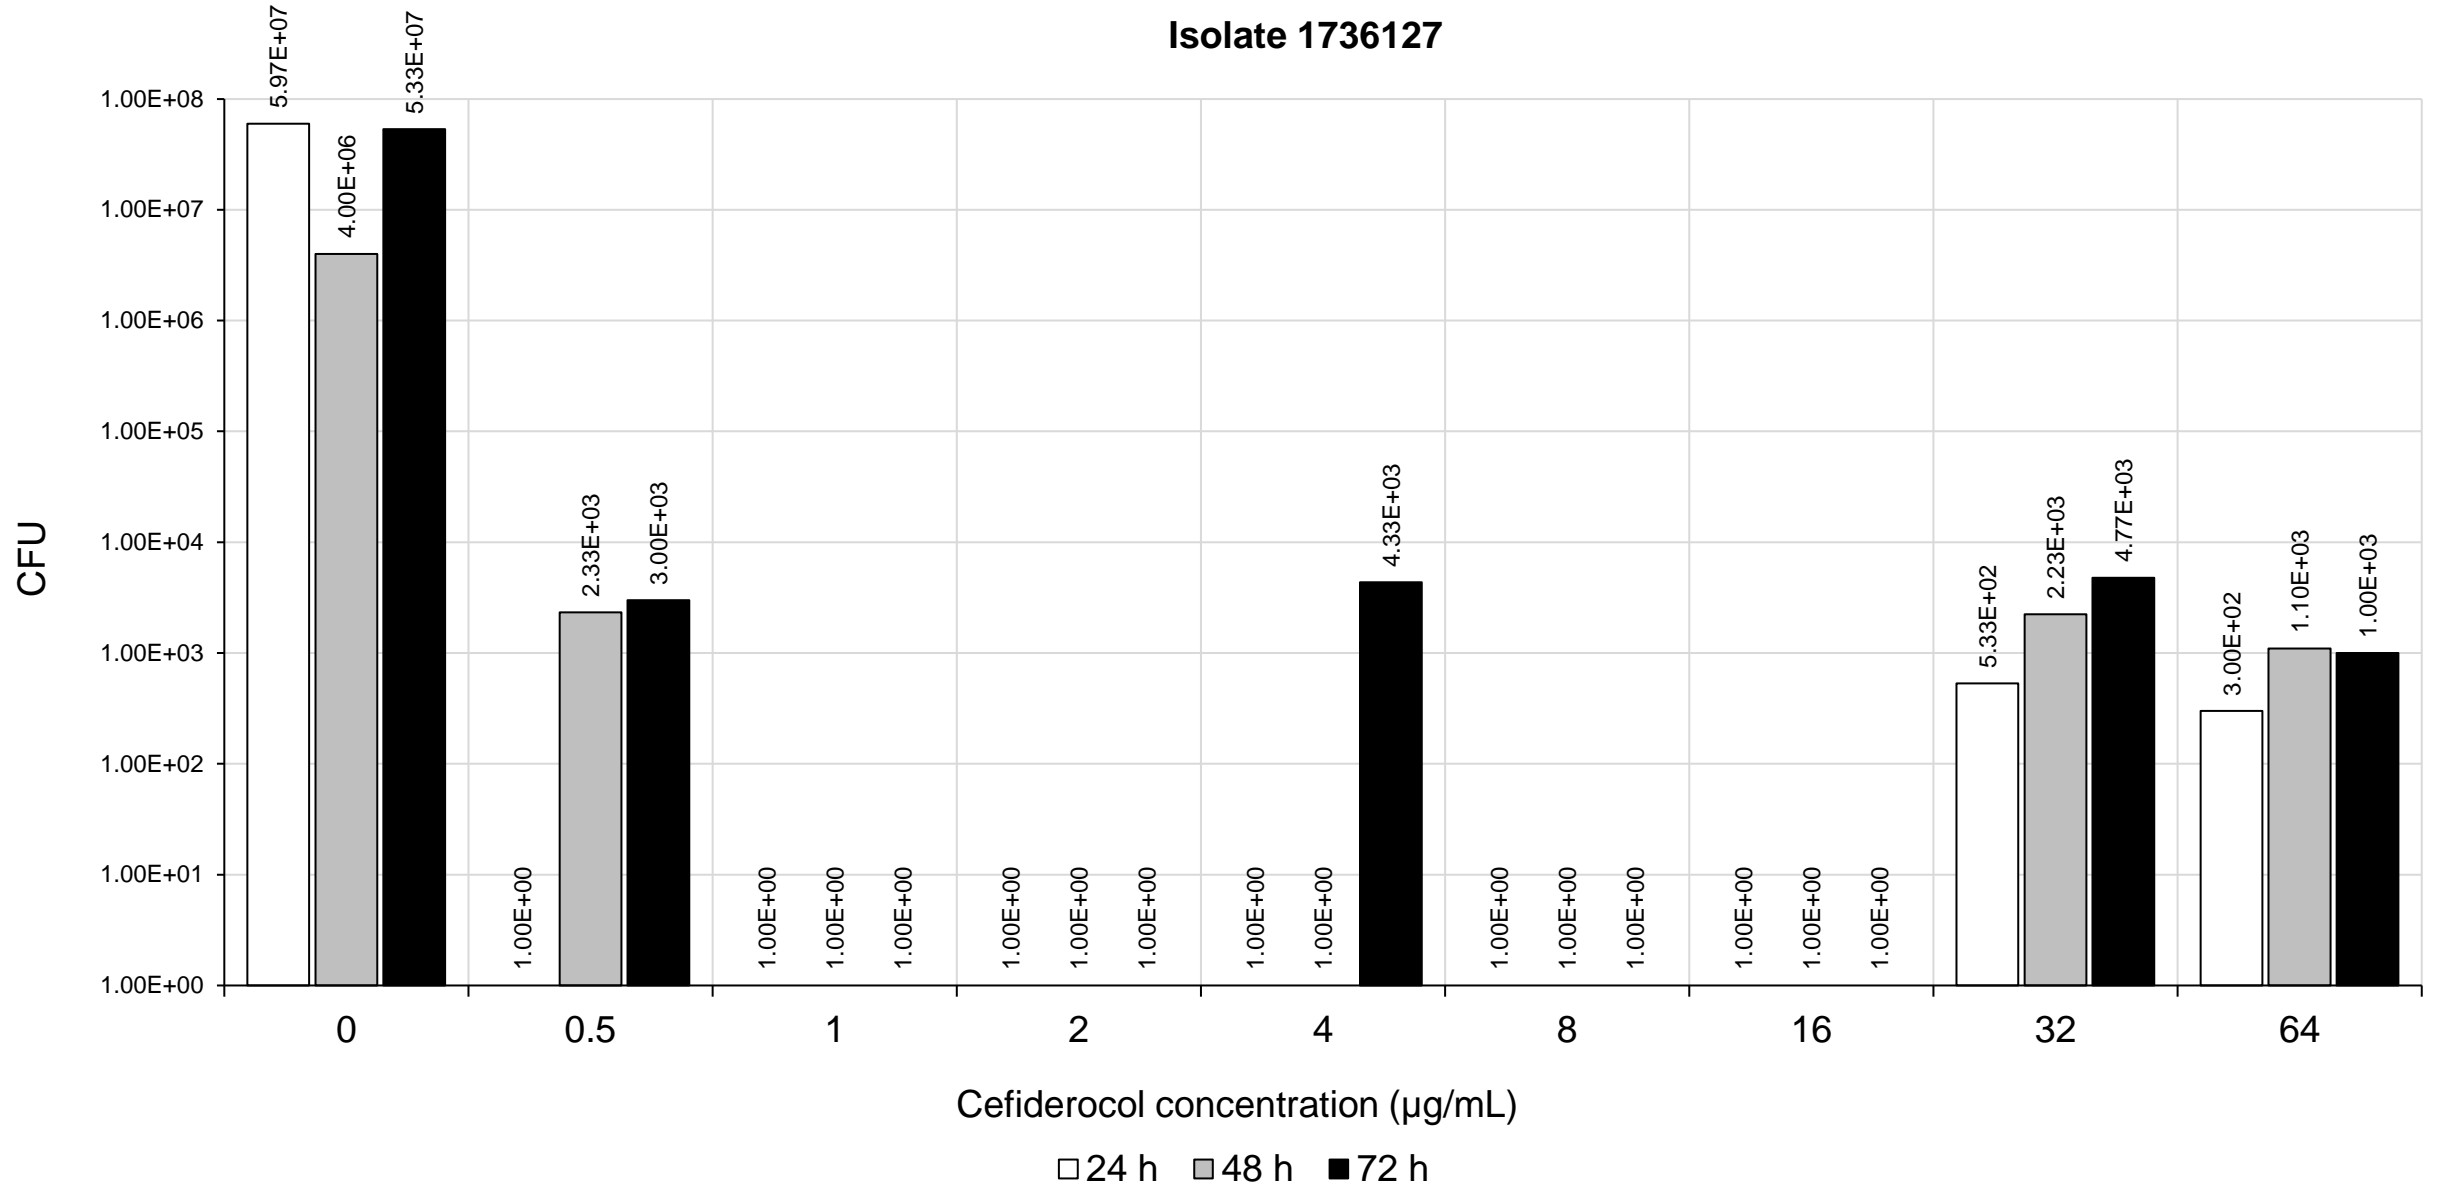

CFU, colony-forming unit; HR, heteroresistant; PAP, population analysis profiling.

Supplementary Fig S1.6.

Growth profile of carbapenem-resistant *Acinetobacter calcoaceticus-baumannii* complex by PAP method

Isolate 1739856

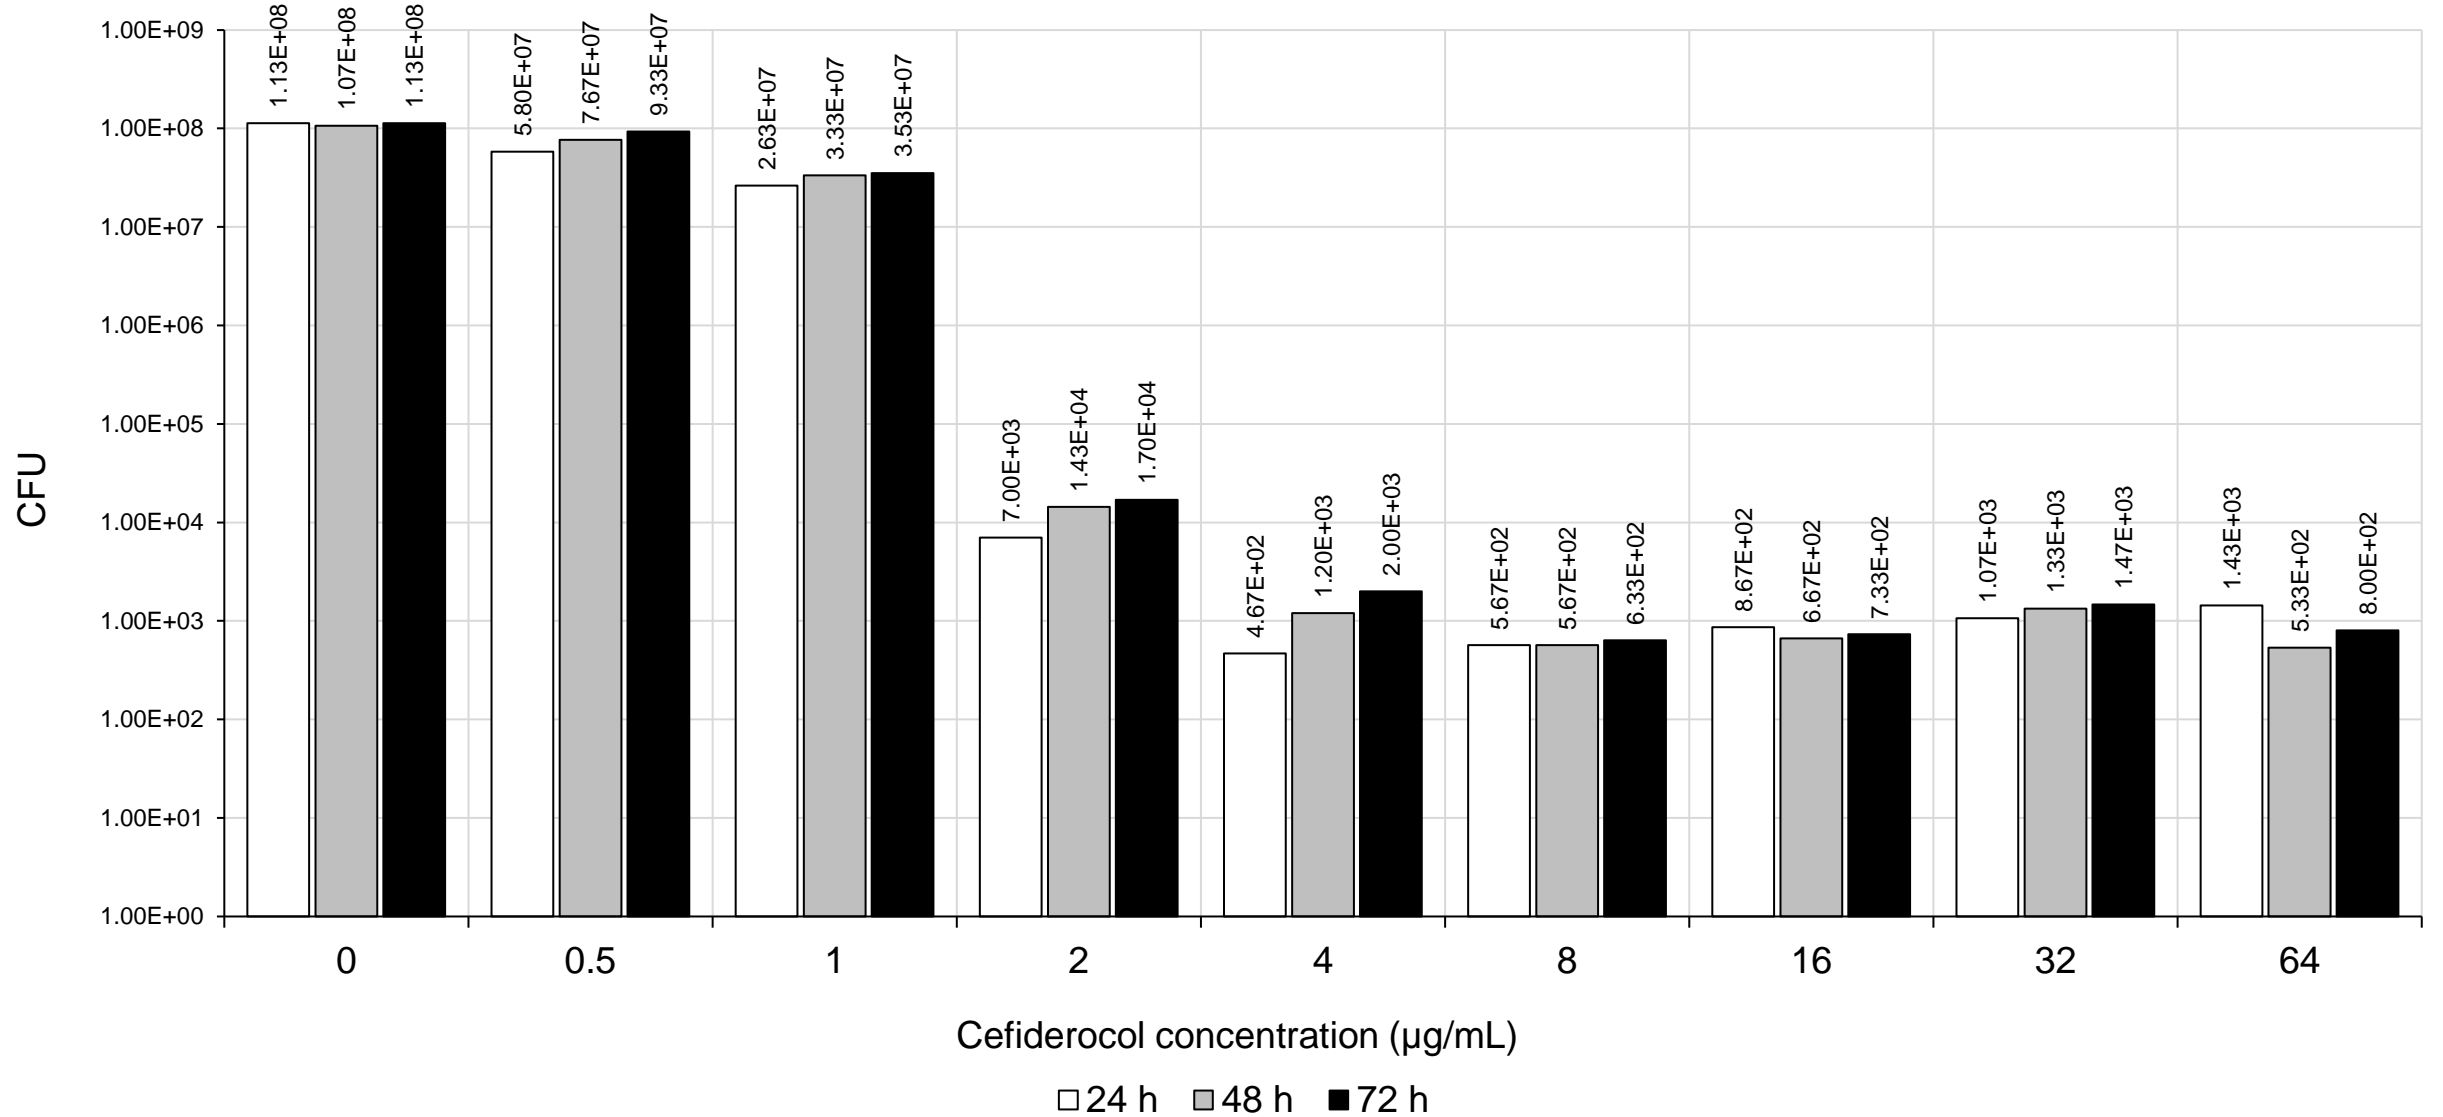

CFU, colony-forming unit; HR, heteroresistant; PAP, population analysis profiling.

Supplementary Fig S1.7.

Growth profile of carbapenem-resistant *Acinetobacter calcoaceticus-baumannii* complex by PAP method



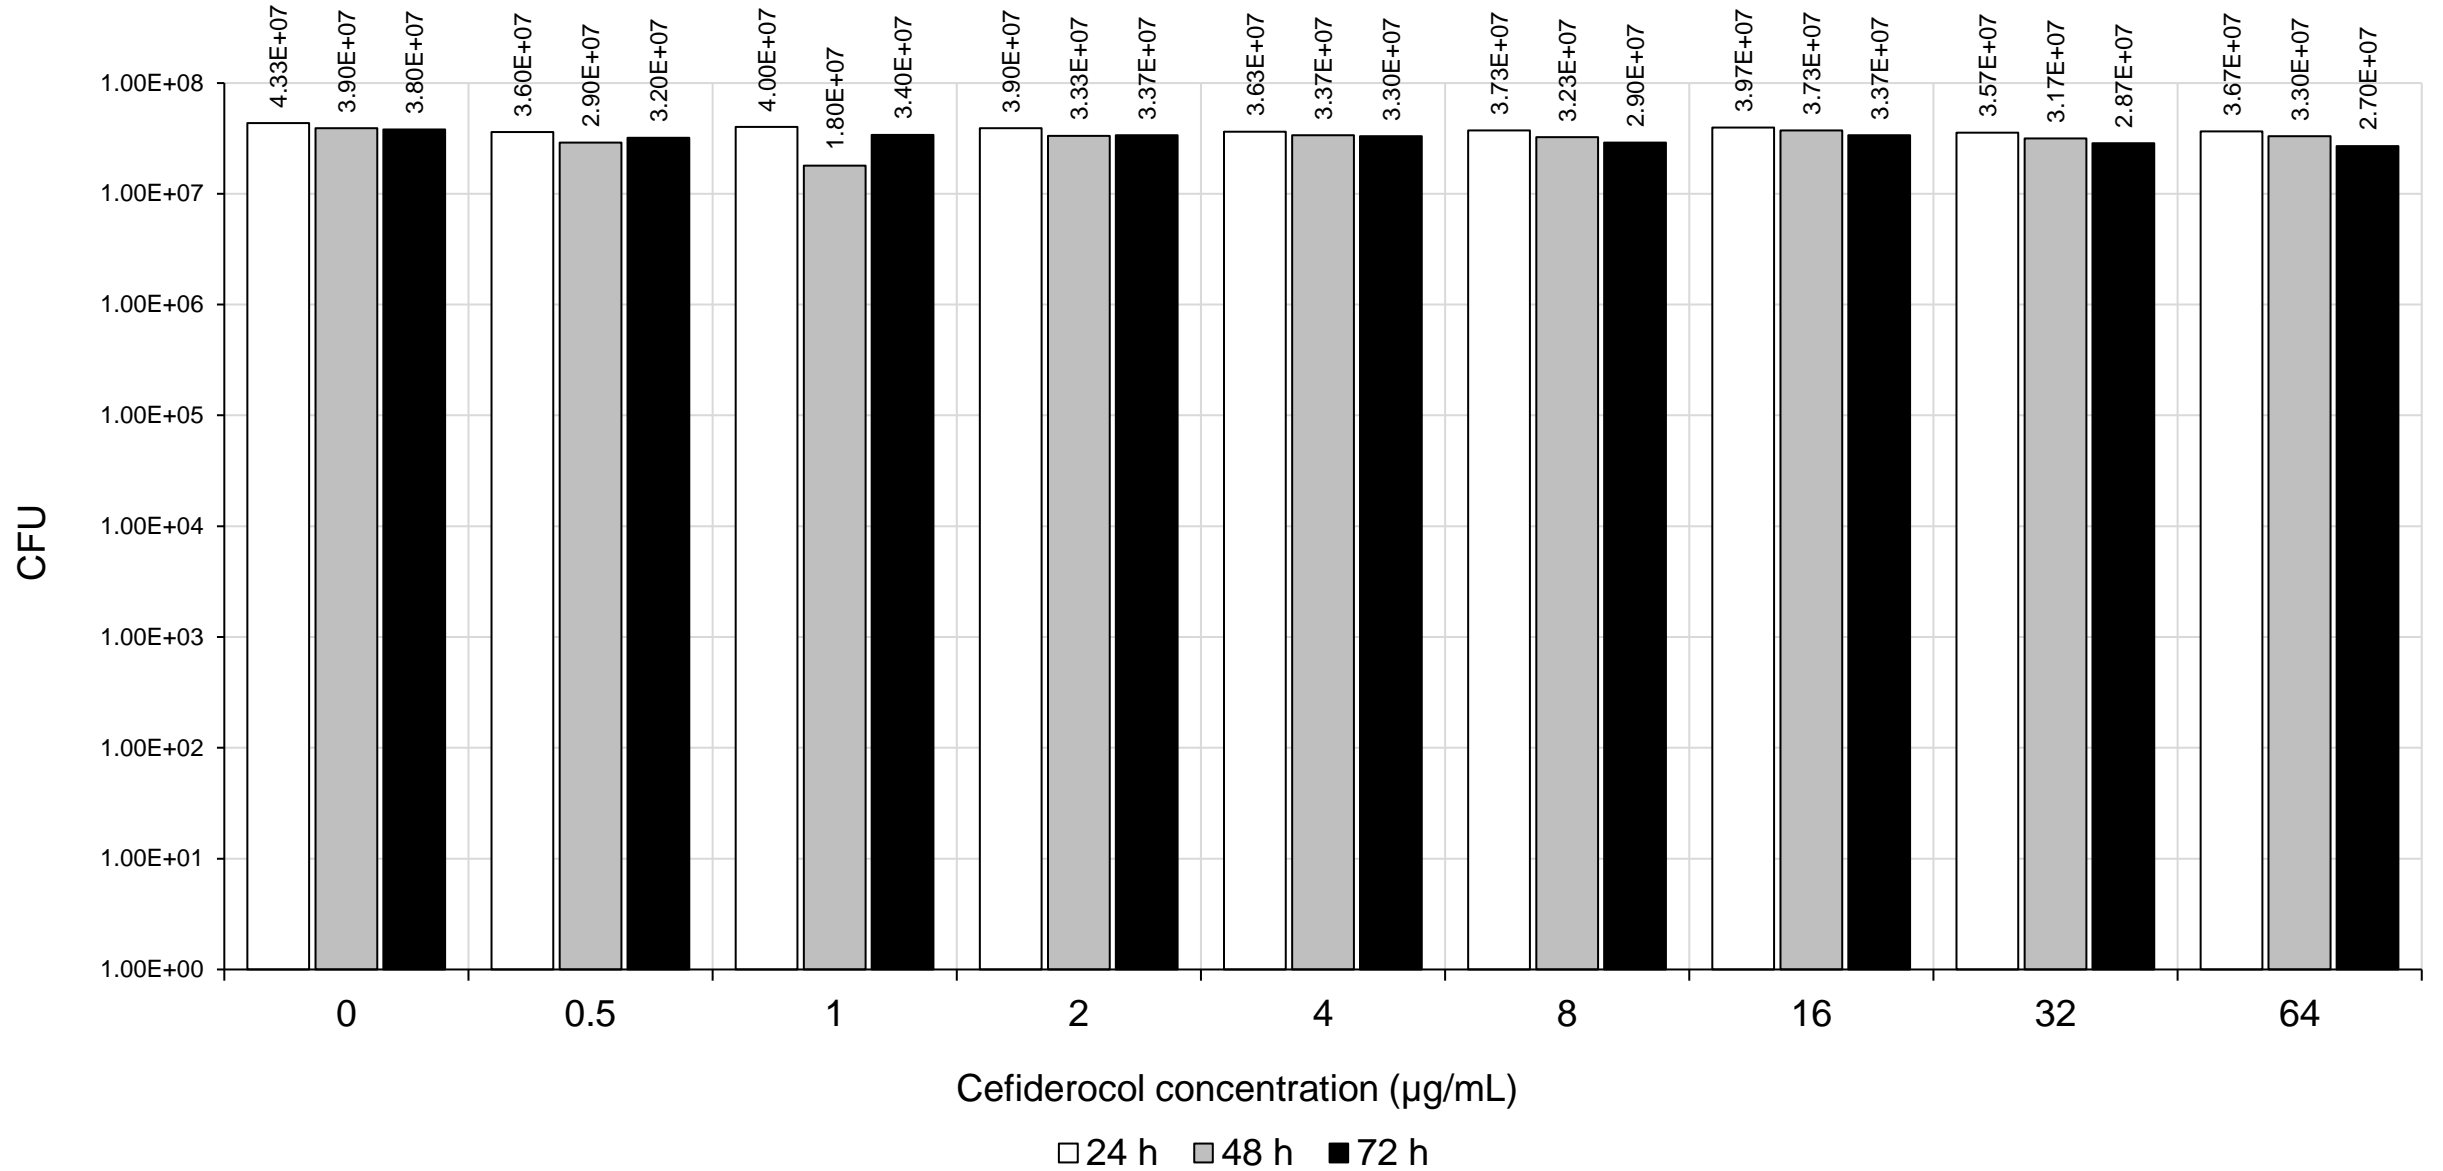

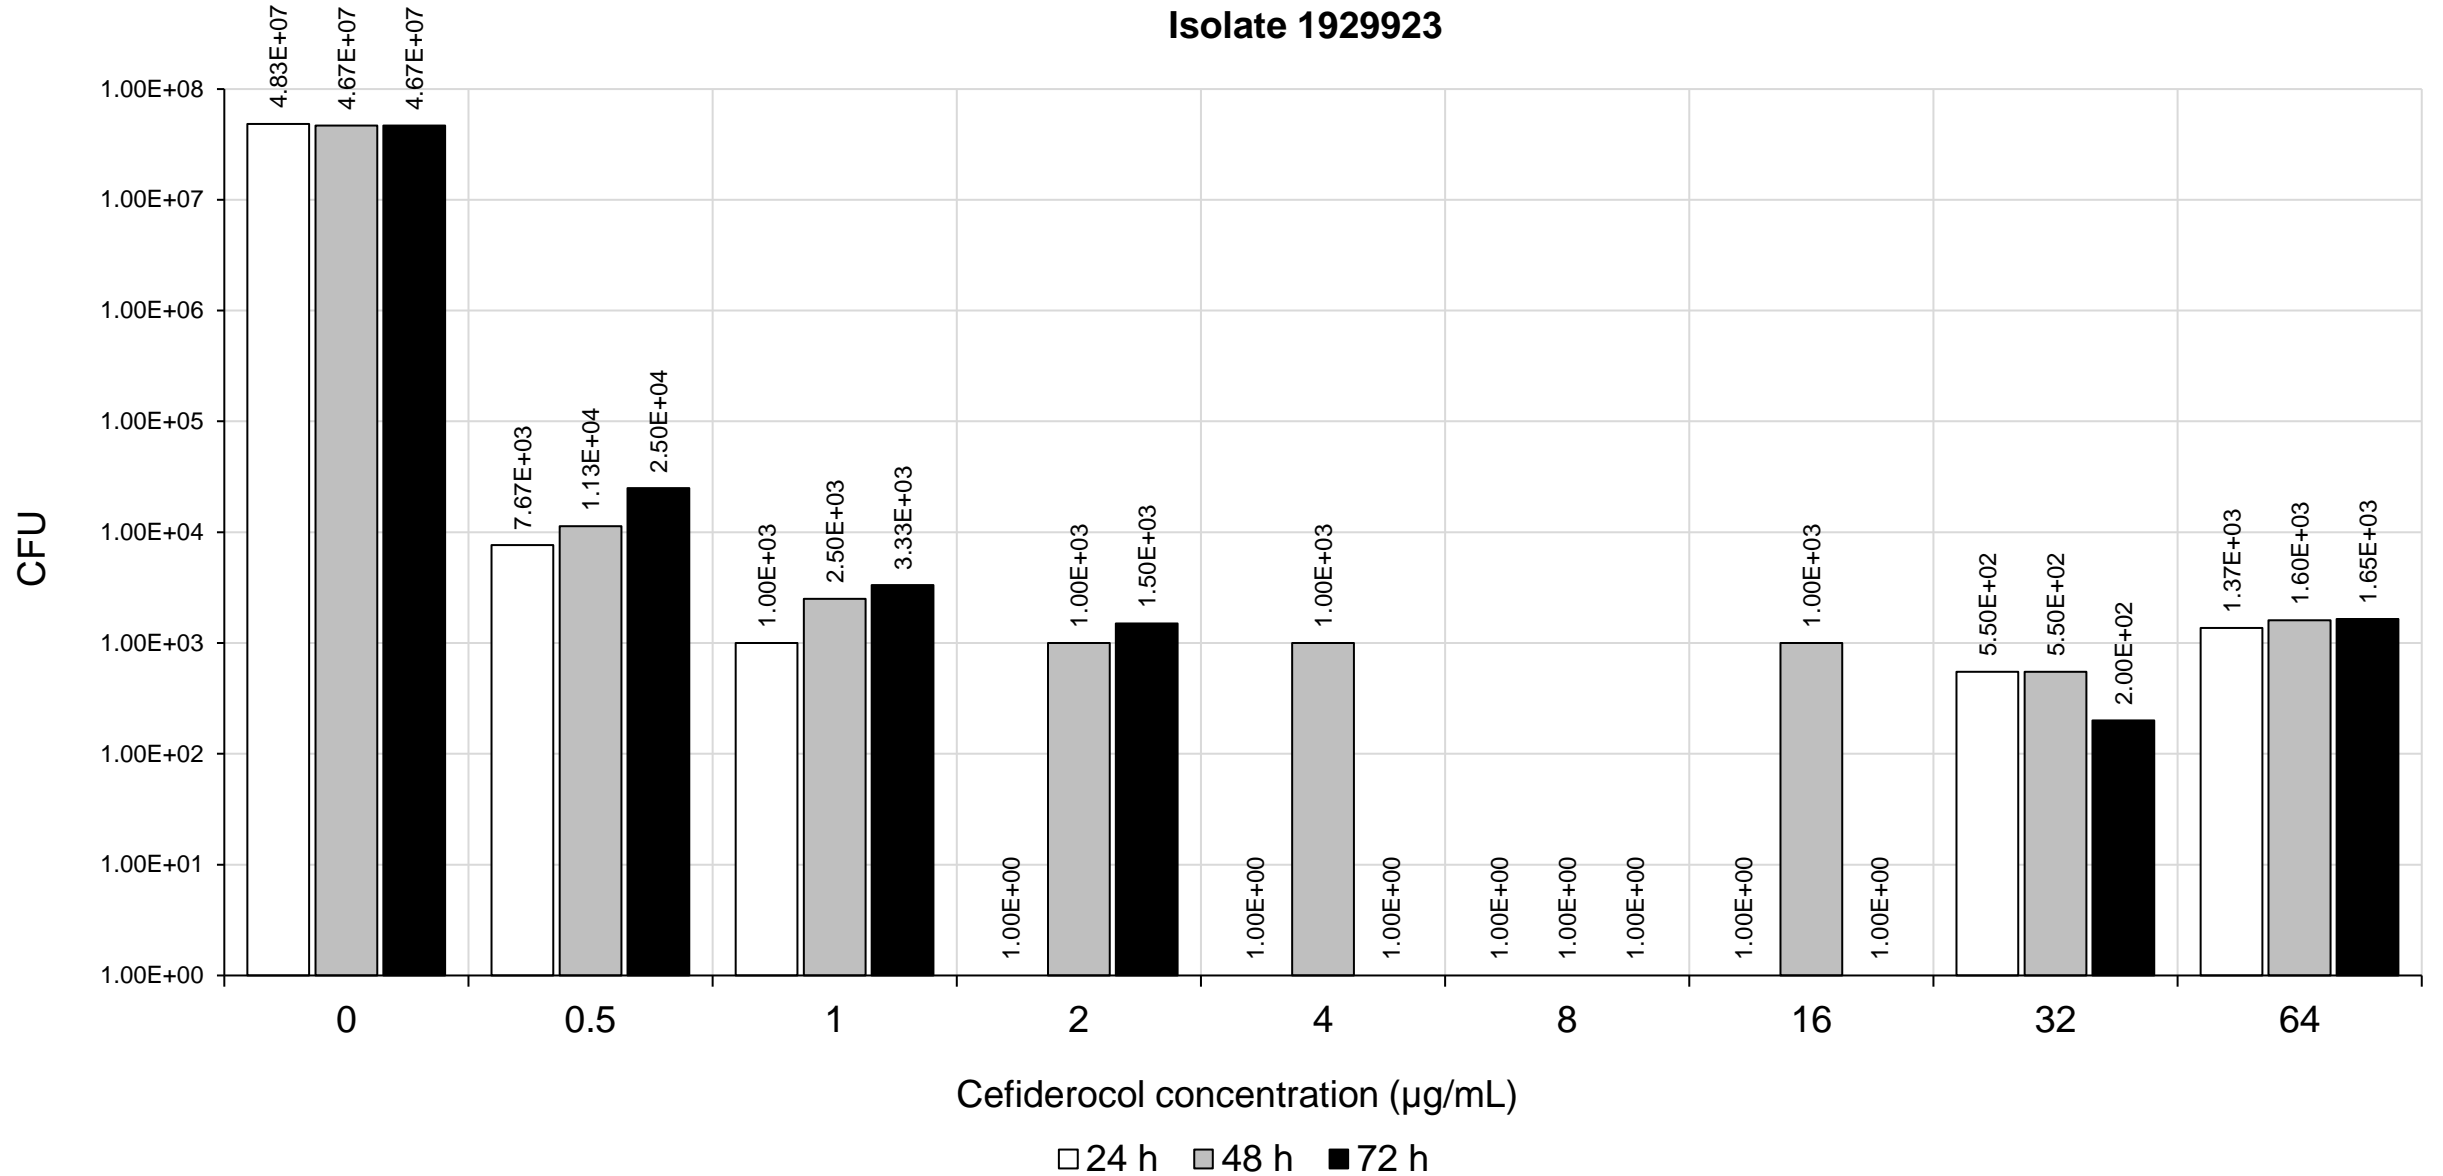

CFU, colony-forming unit; HR, heteroresistant; PAP, population analysis profiling.

PAP-S

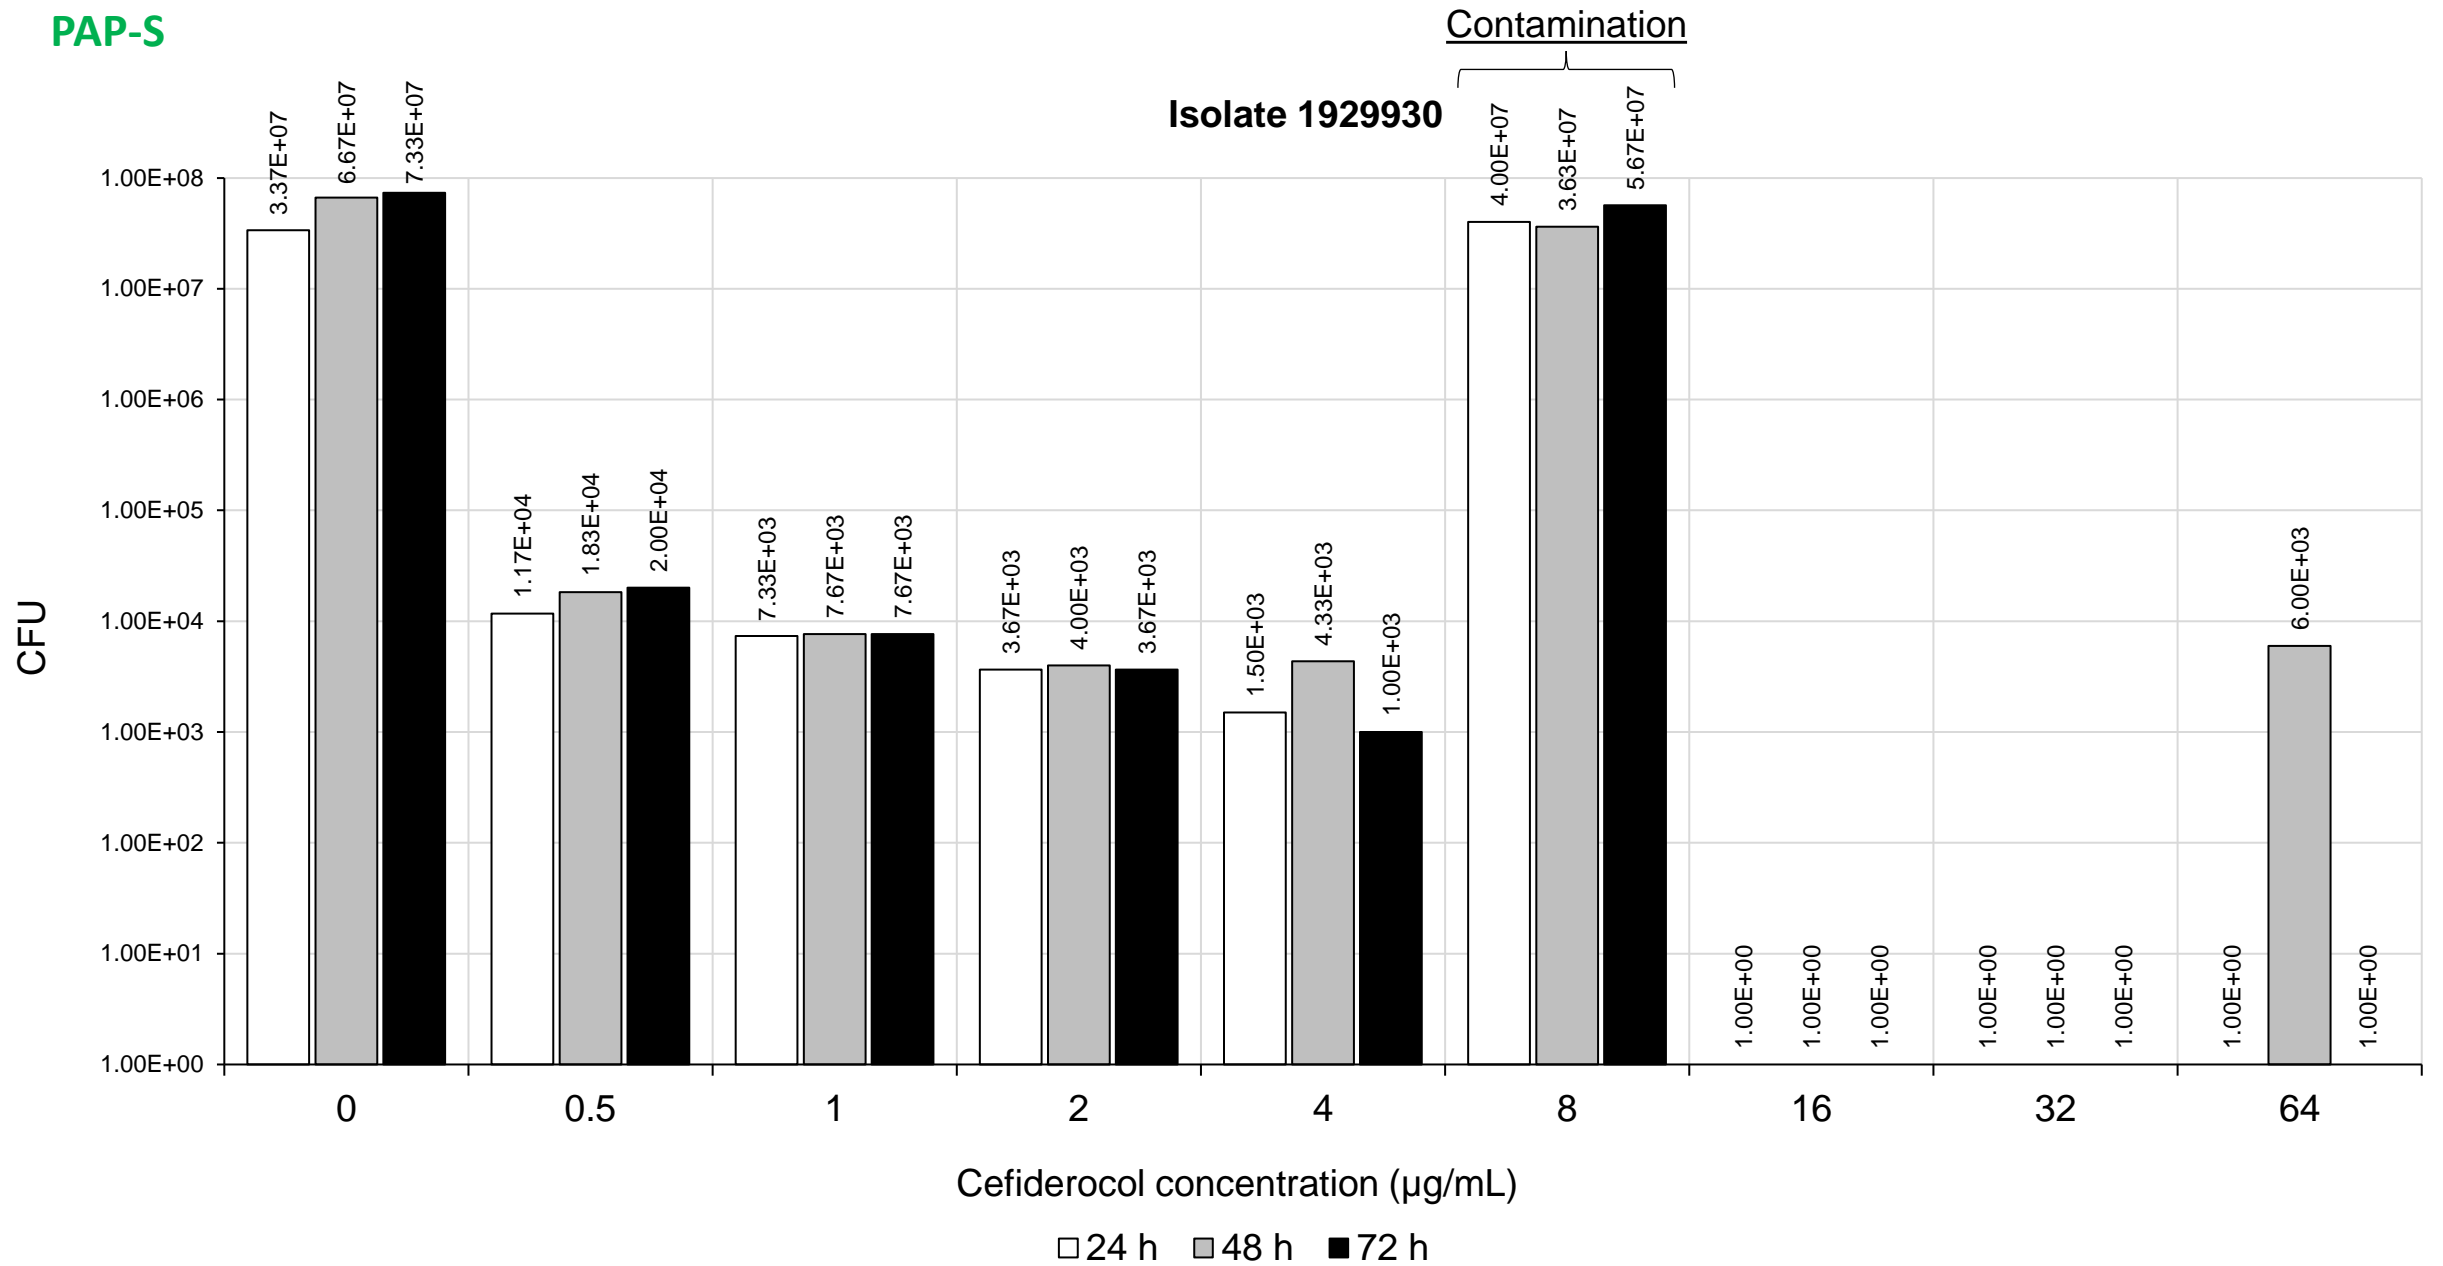

CFU, colony-forming unit; PAP, population analysis profiling; S, susceptible.

Supplementary Fig S1.10.  
Growth profile of carbapenem-resistant *Acinetobacter calcoaceticus-baumannii* complex by PAP method

Isolate 1943460

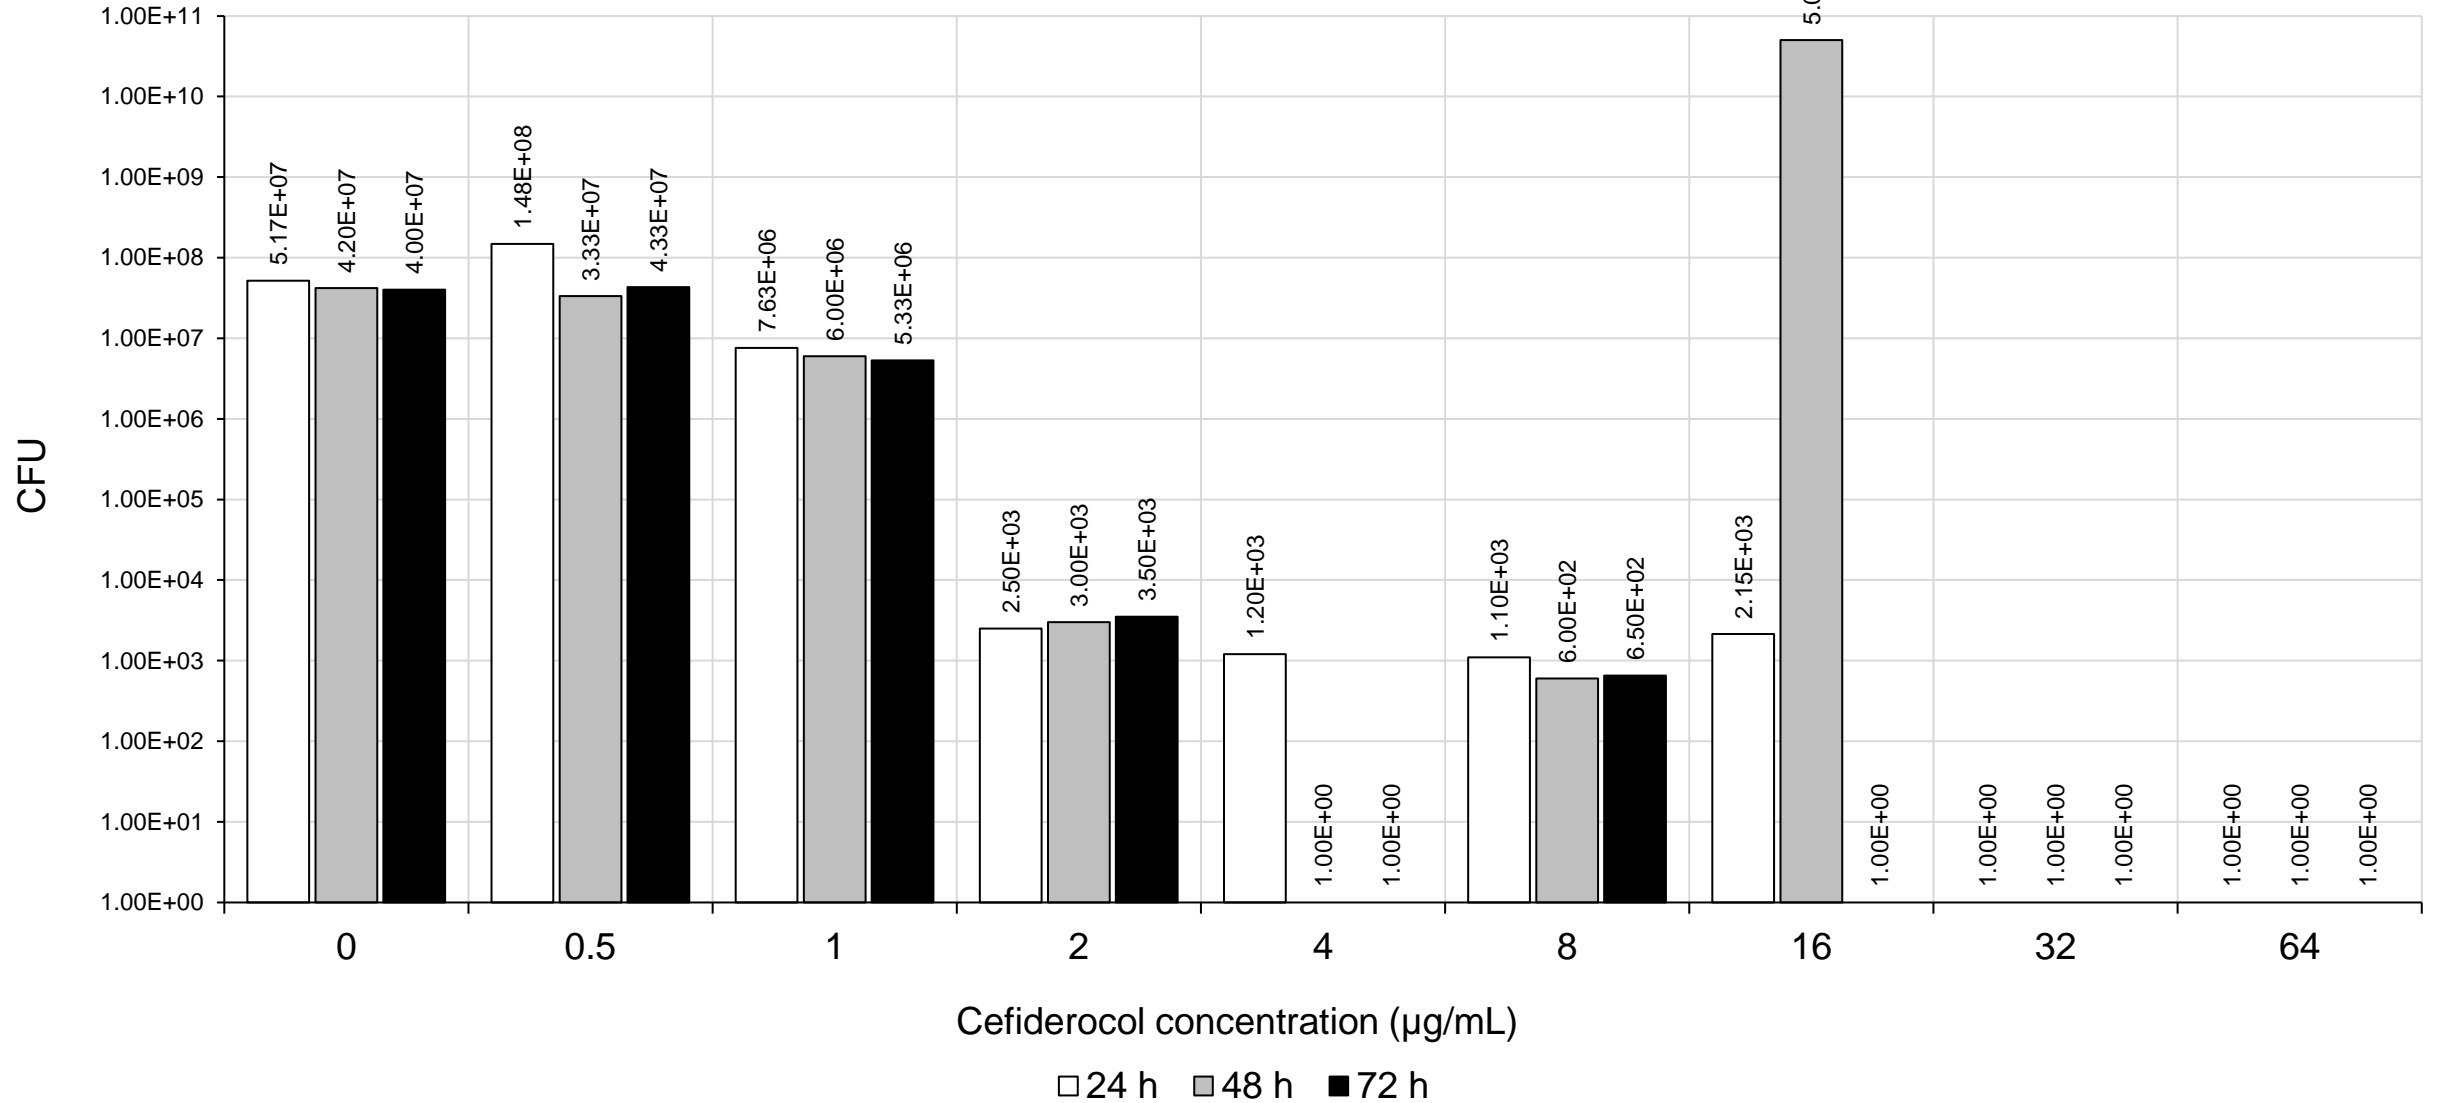

CFU, colony-forming unit; PAP, population analysis profiling; S, susceptible.

Supplementary Fig S1.11.

Growth profile of carbapenem-resistant *Acinetobacter calcoaceticus-baumannii* complex by PAP method

Isolate 1944203

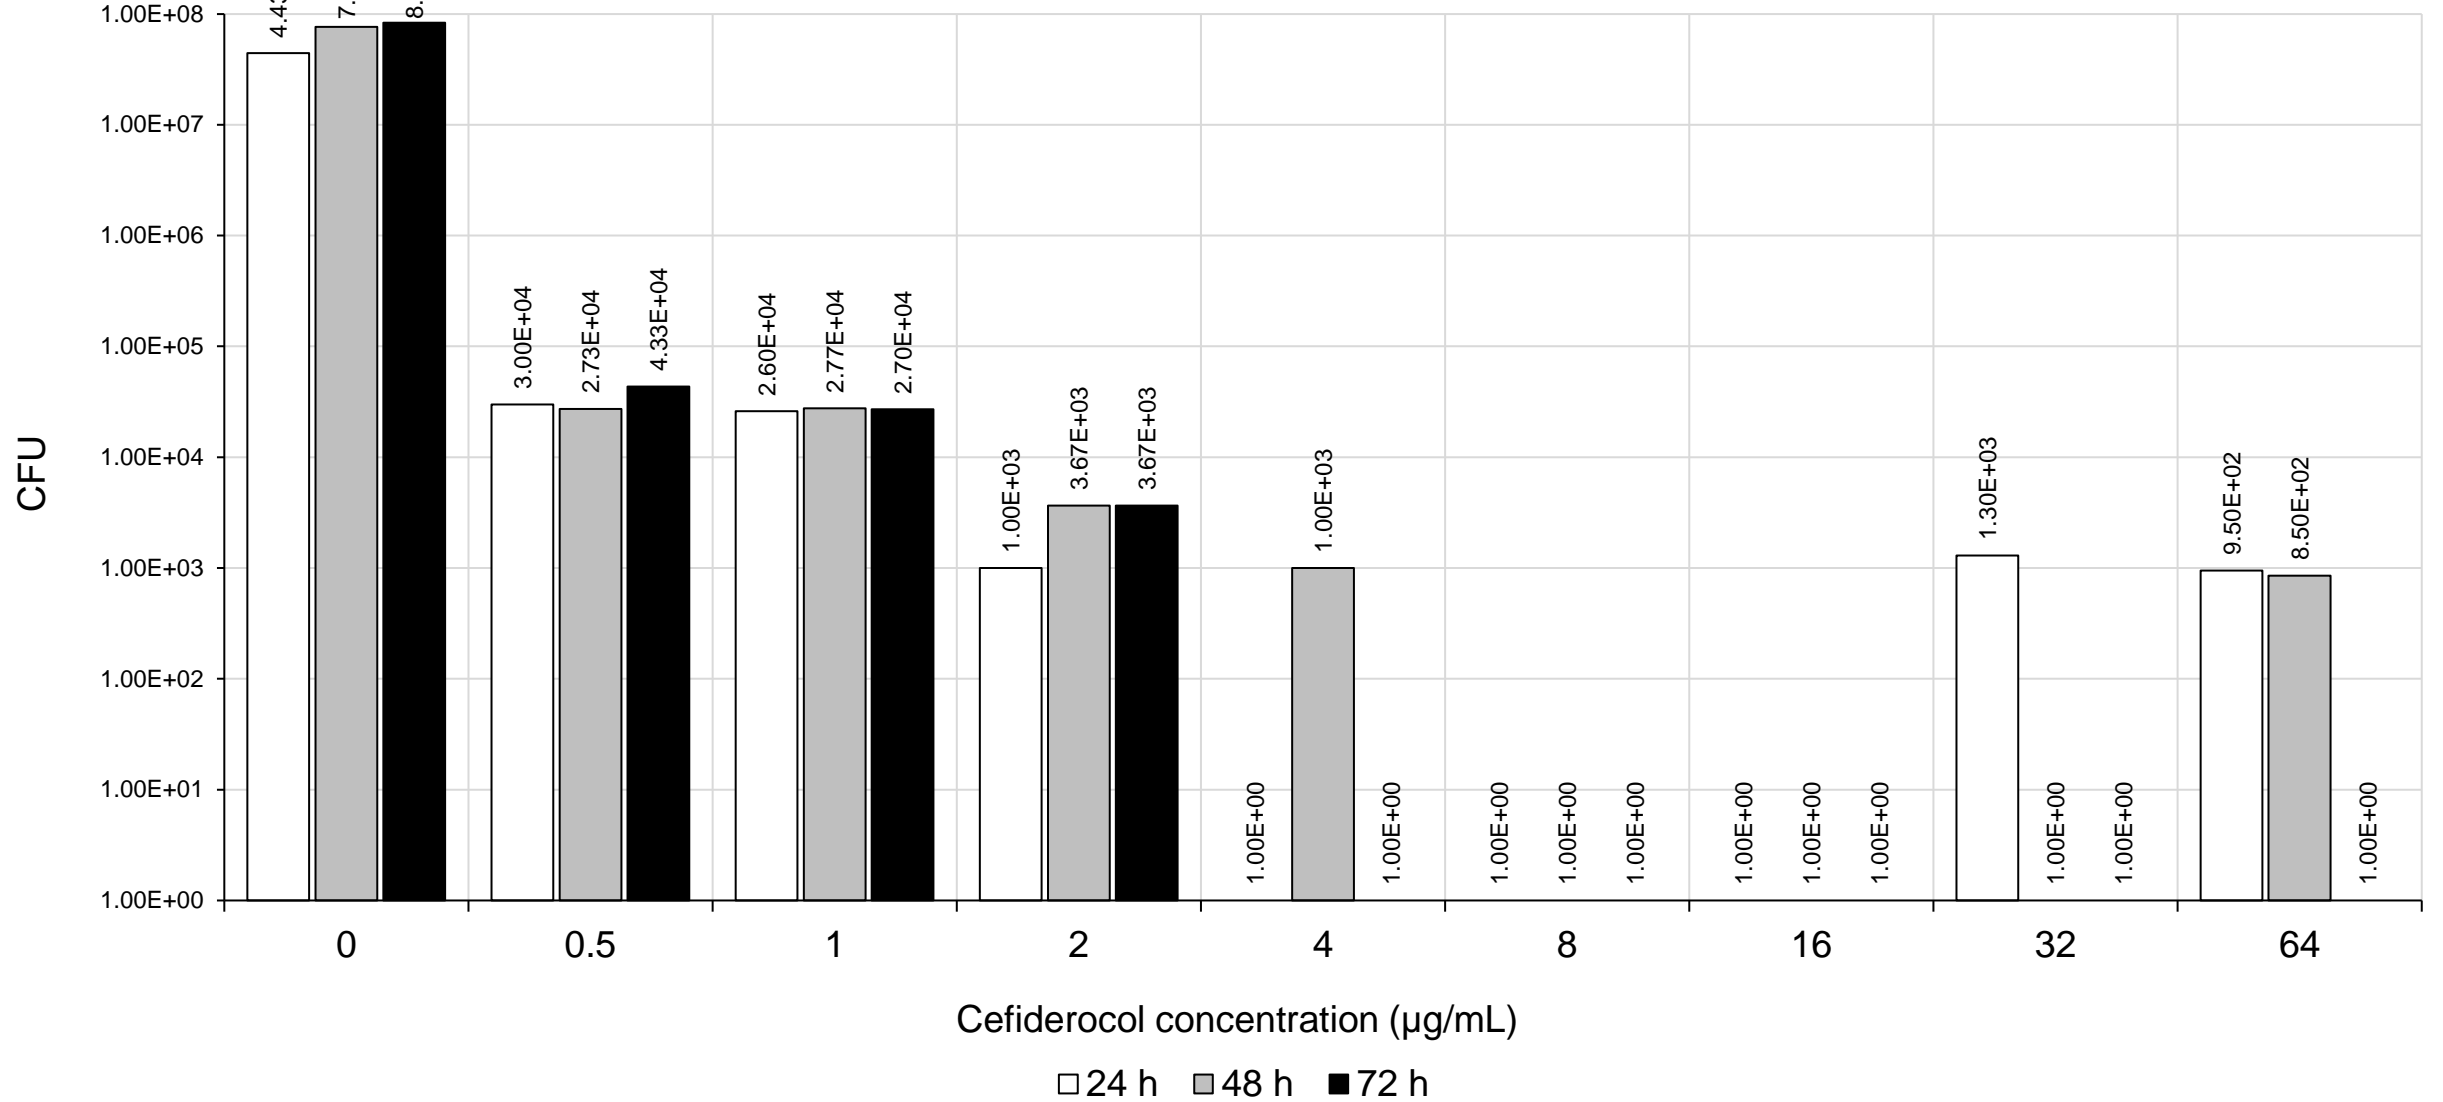

CFU, colony-forming unit; PAP, population analysis profiling; S, susceptible.

Supplementary Fig S1.12.

Growth profile of carbapenem-resistant *Acinetobacter calcoaceticus-baumannii* complex by PAP method

Isolate 1949636

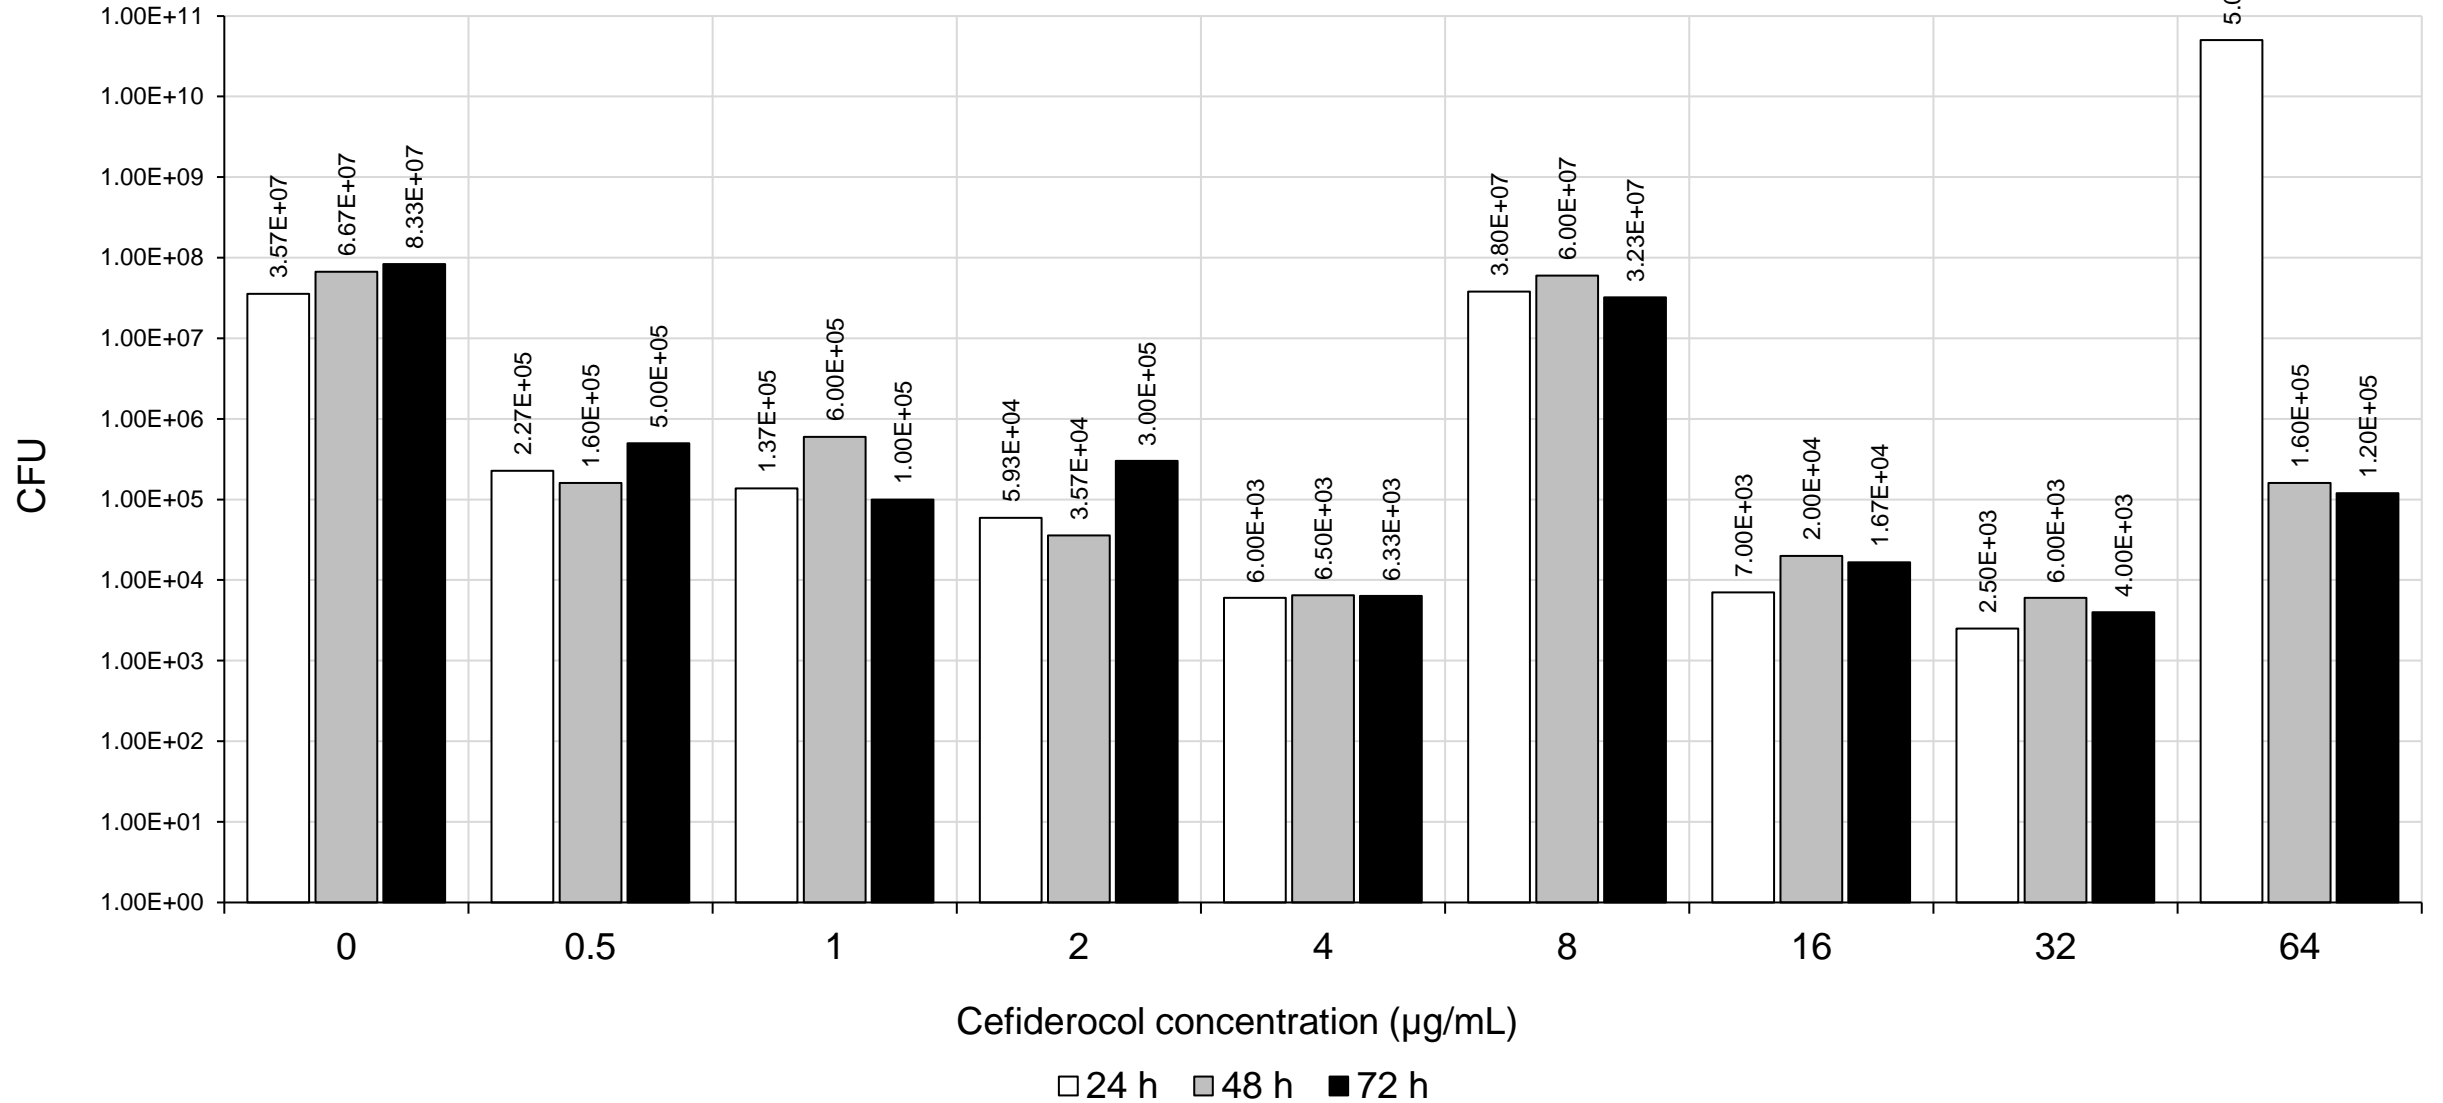

Isolate 1949644

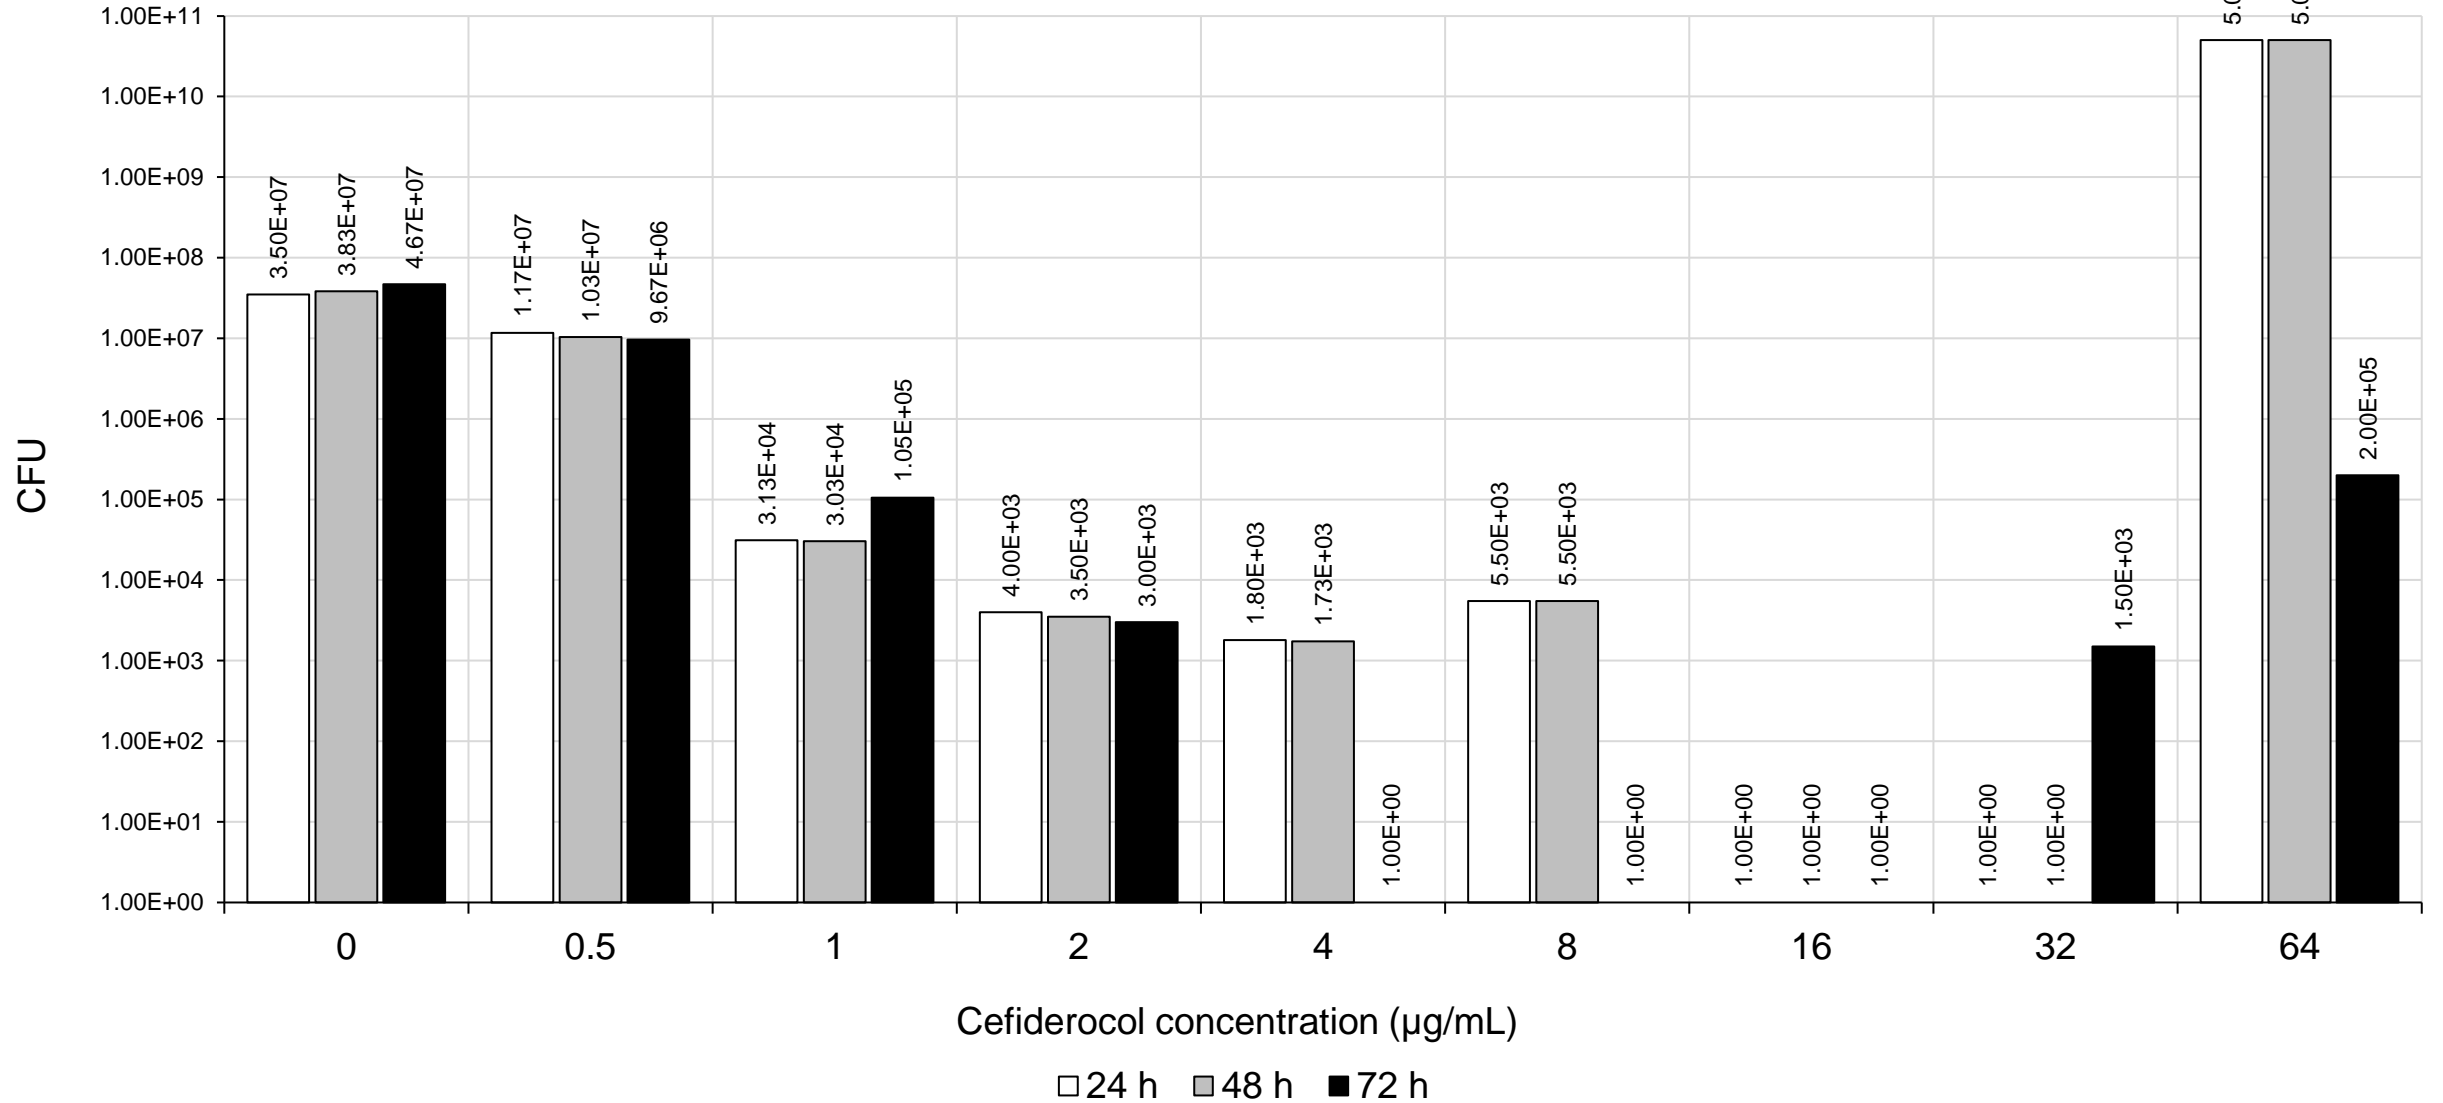

Isolate 1951392

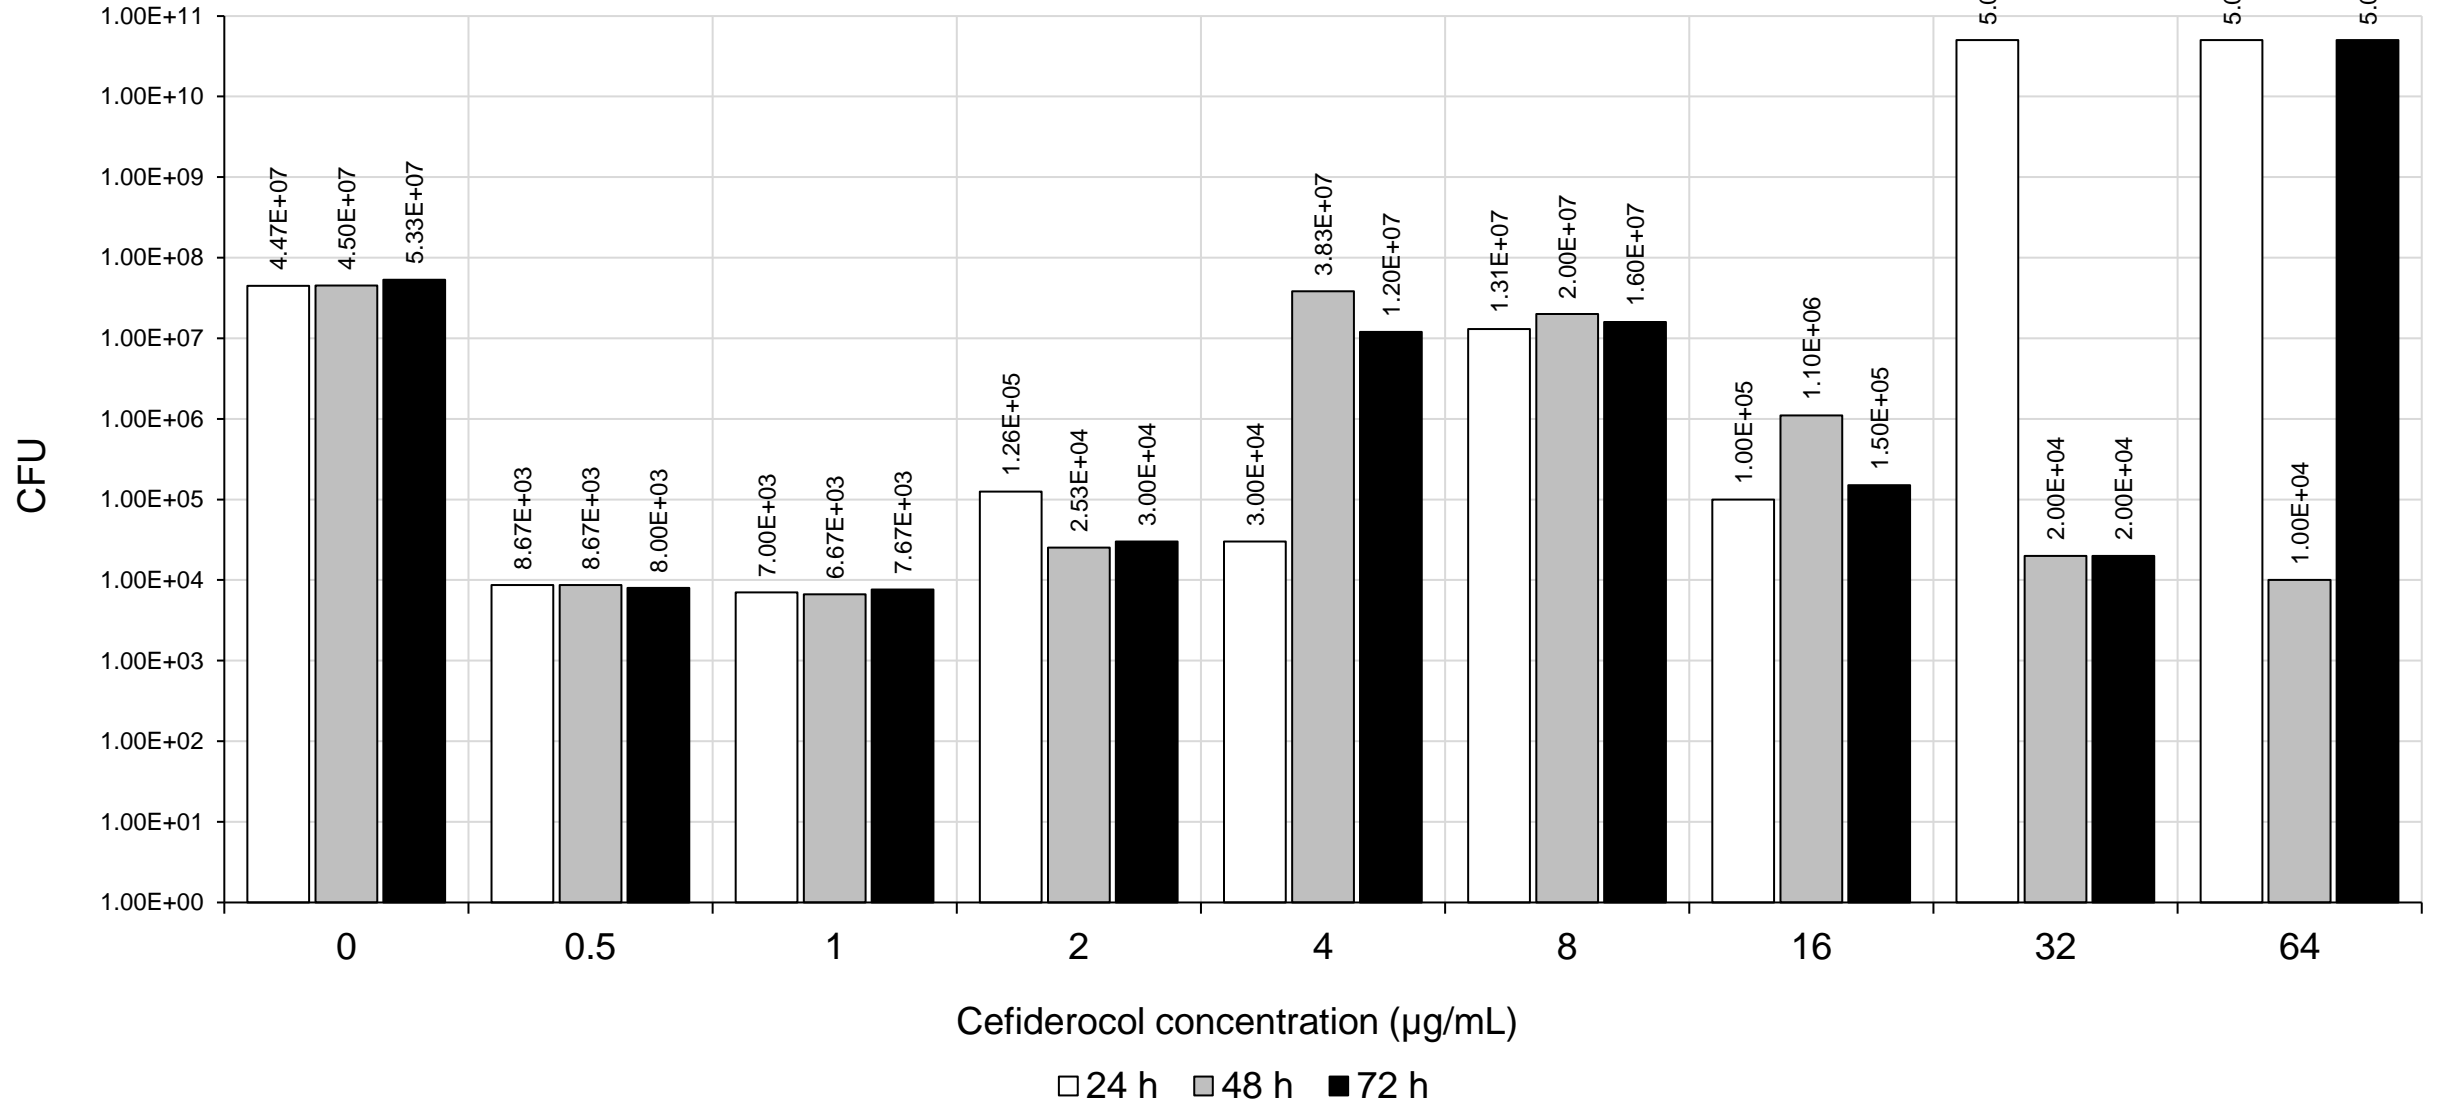



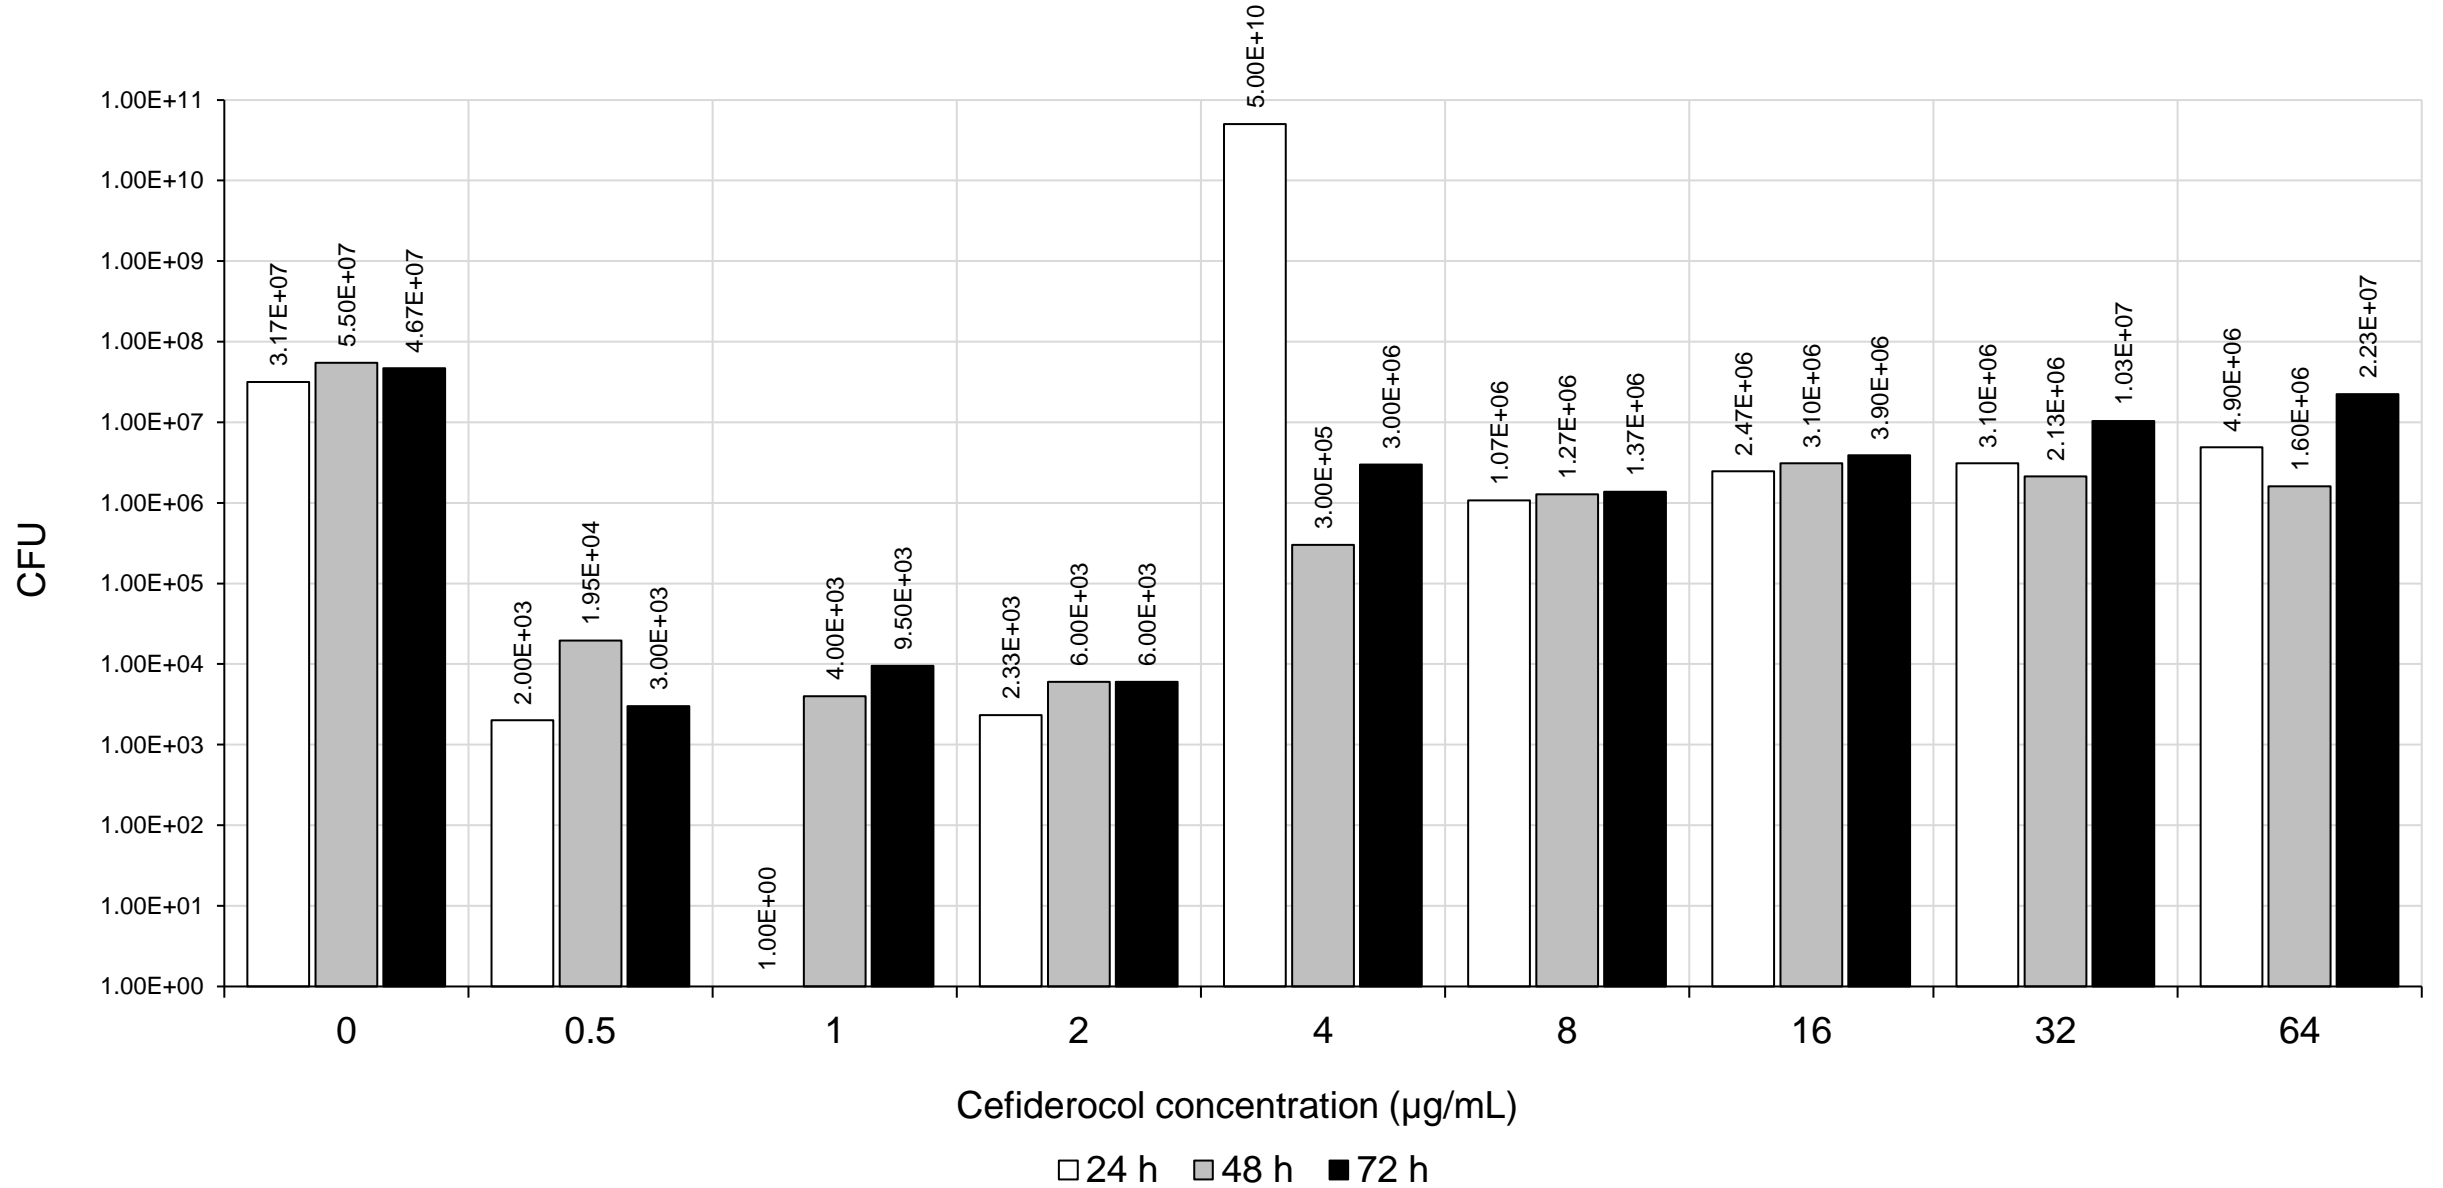

Isolate 1952333

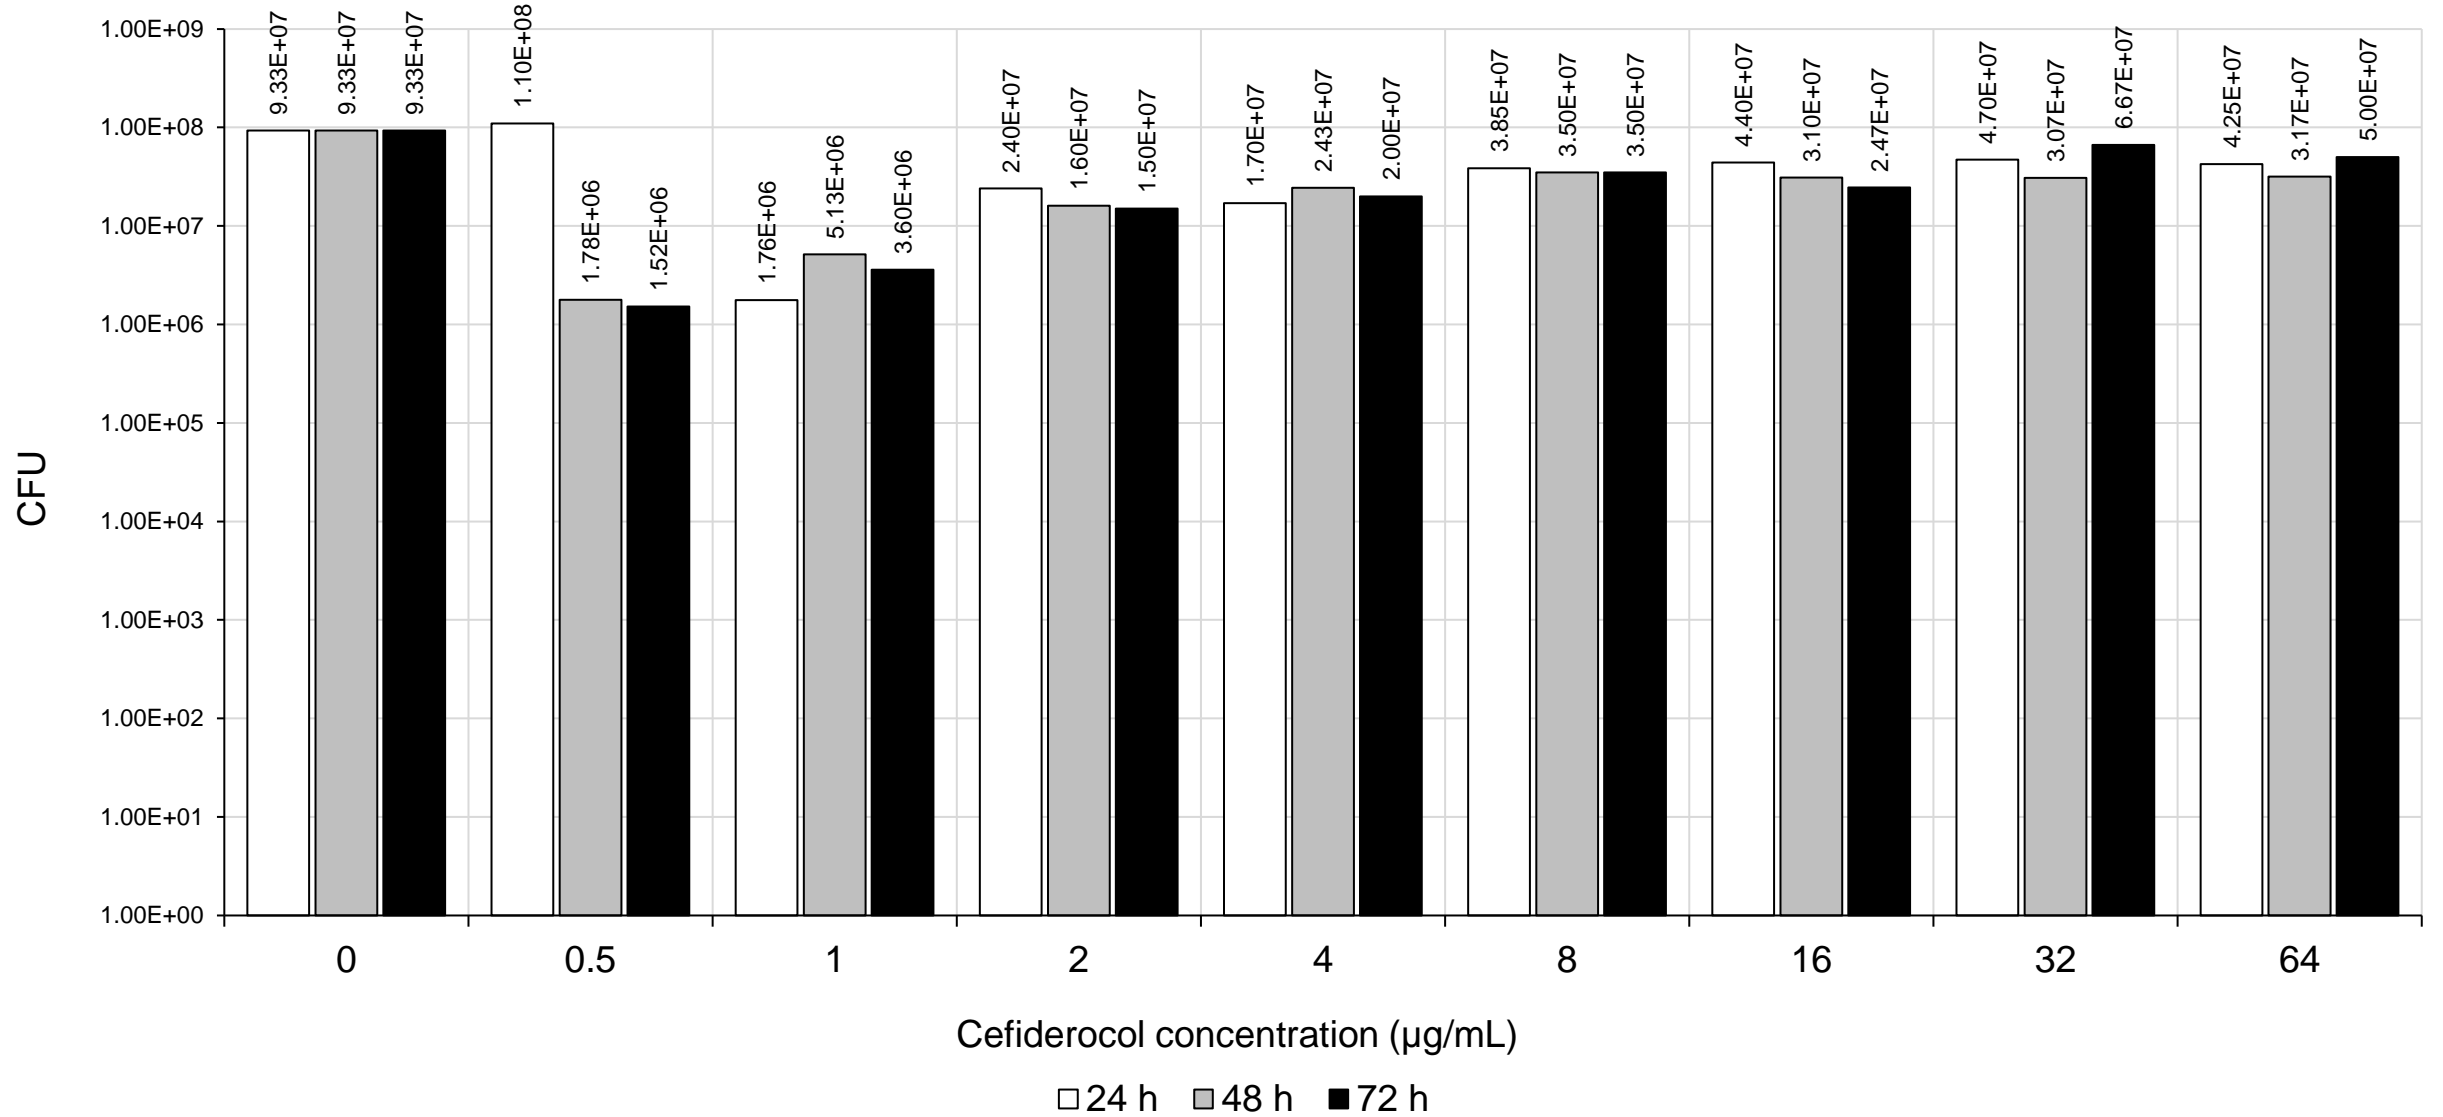

CFU, colony-forming unit; PAP, population analysis profiling; R, resistant.

Supplementary Fig S1.17.

Growth profile of carbapenem-resistant *Acinetobacter calcoaceticus-baumannii* complex by PAP method

Isolate 1995650

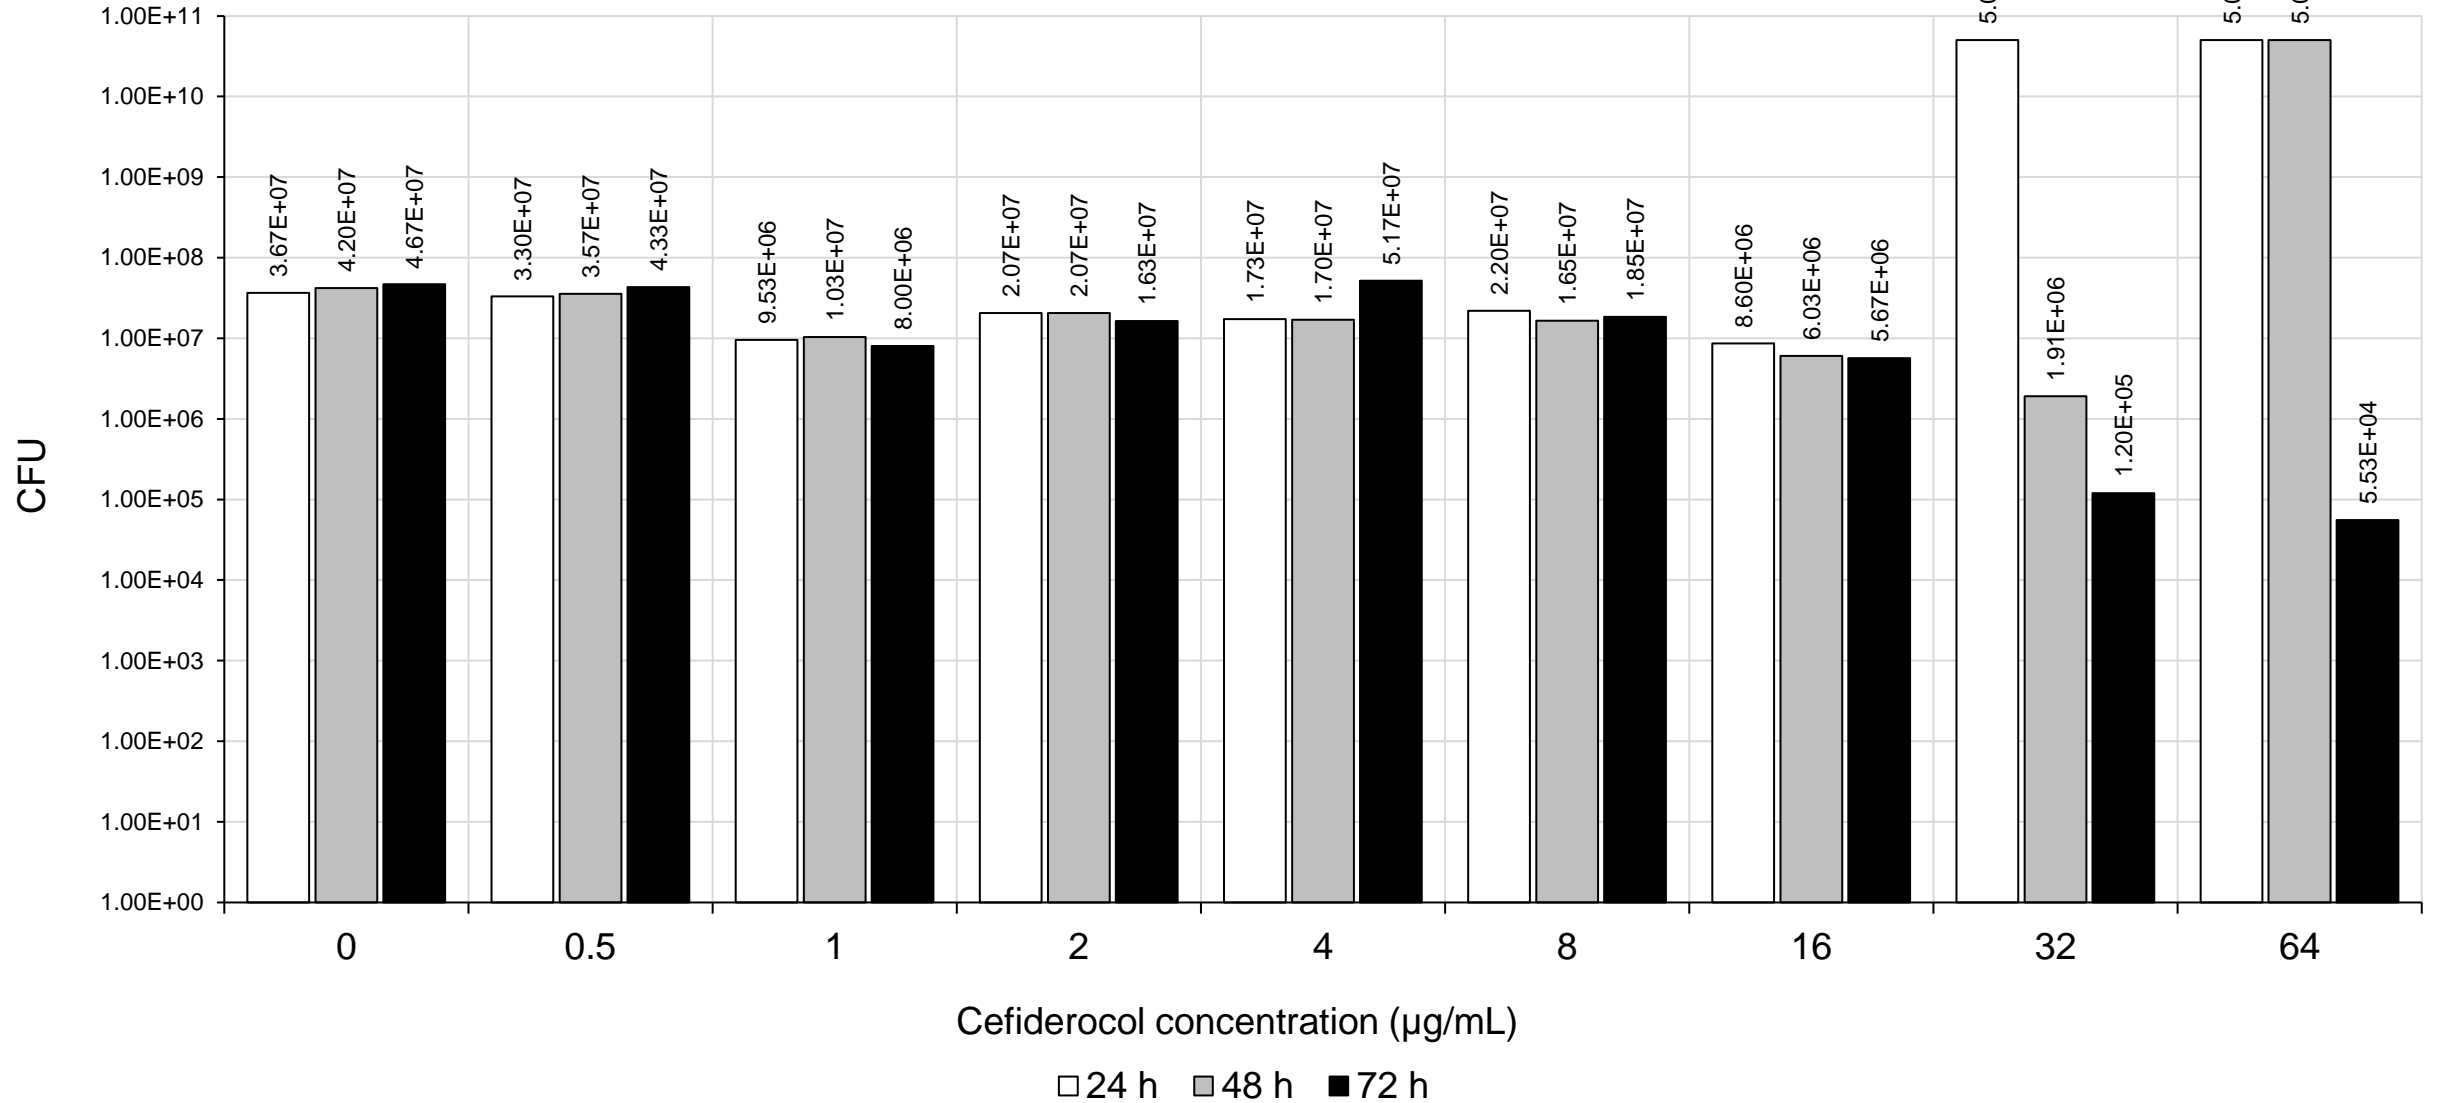

CFU, colony-forming unit; HR, heteroresistant; PAP, population analysis profiling.

Supplementary Fig S1.18.

Growth profile of carbapenem-resistant *Acinetobacter calcoaceticus-baumannii* complex by PAP method

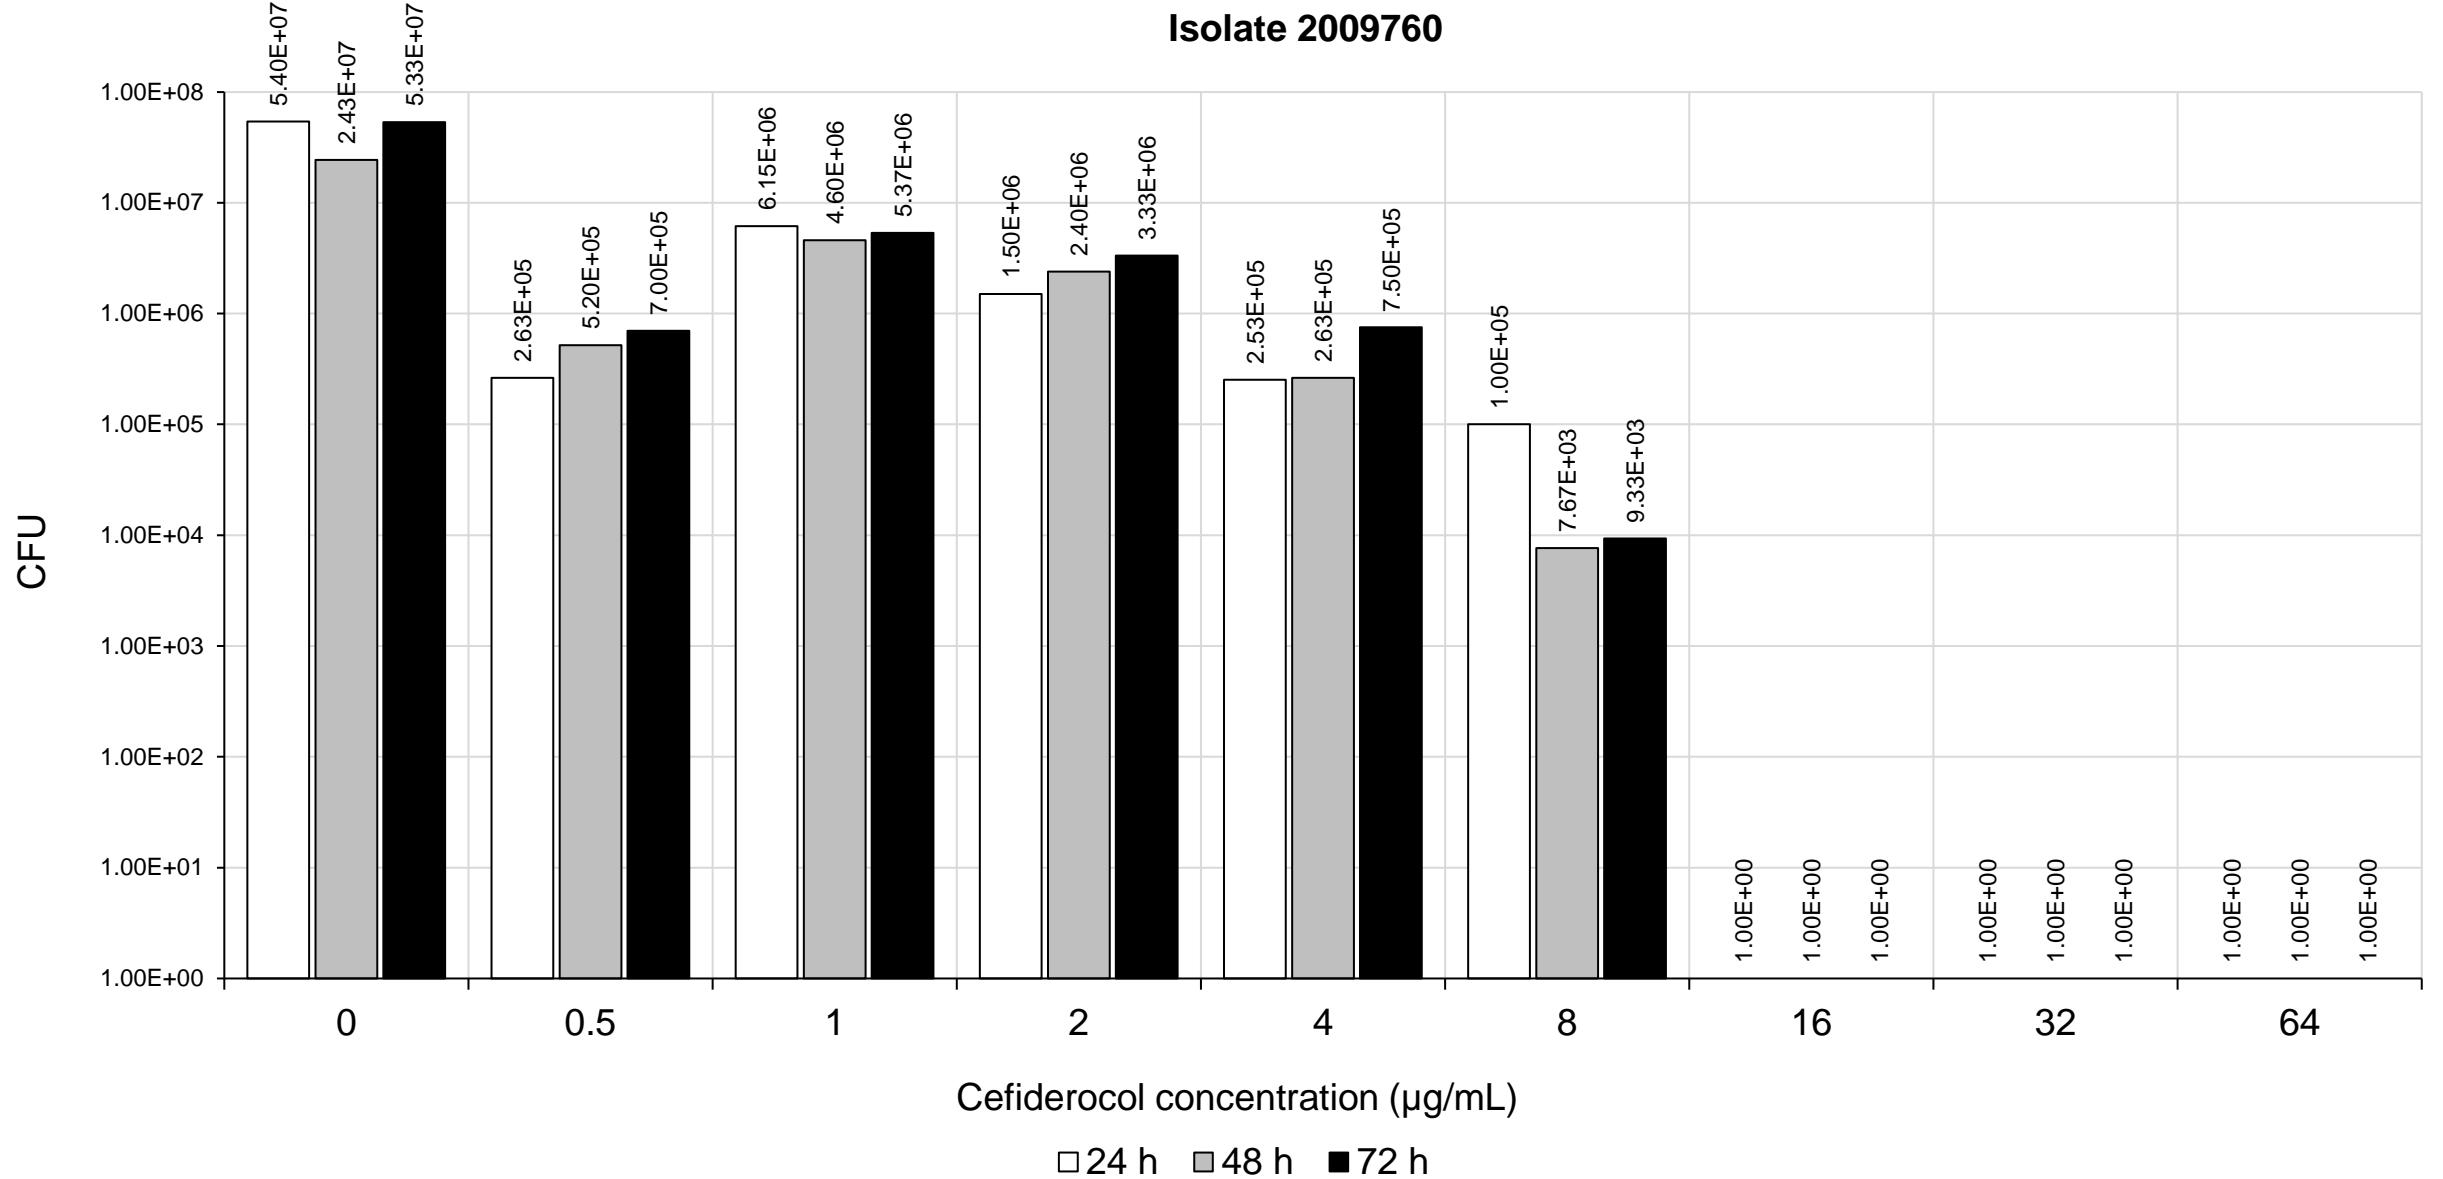

Isolate 2033907

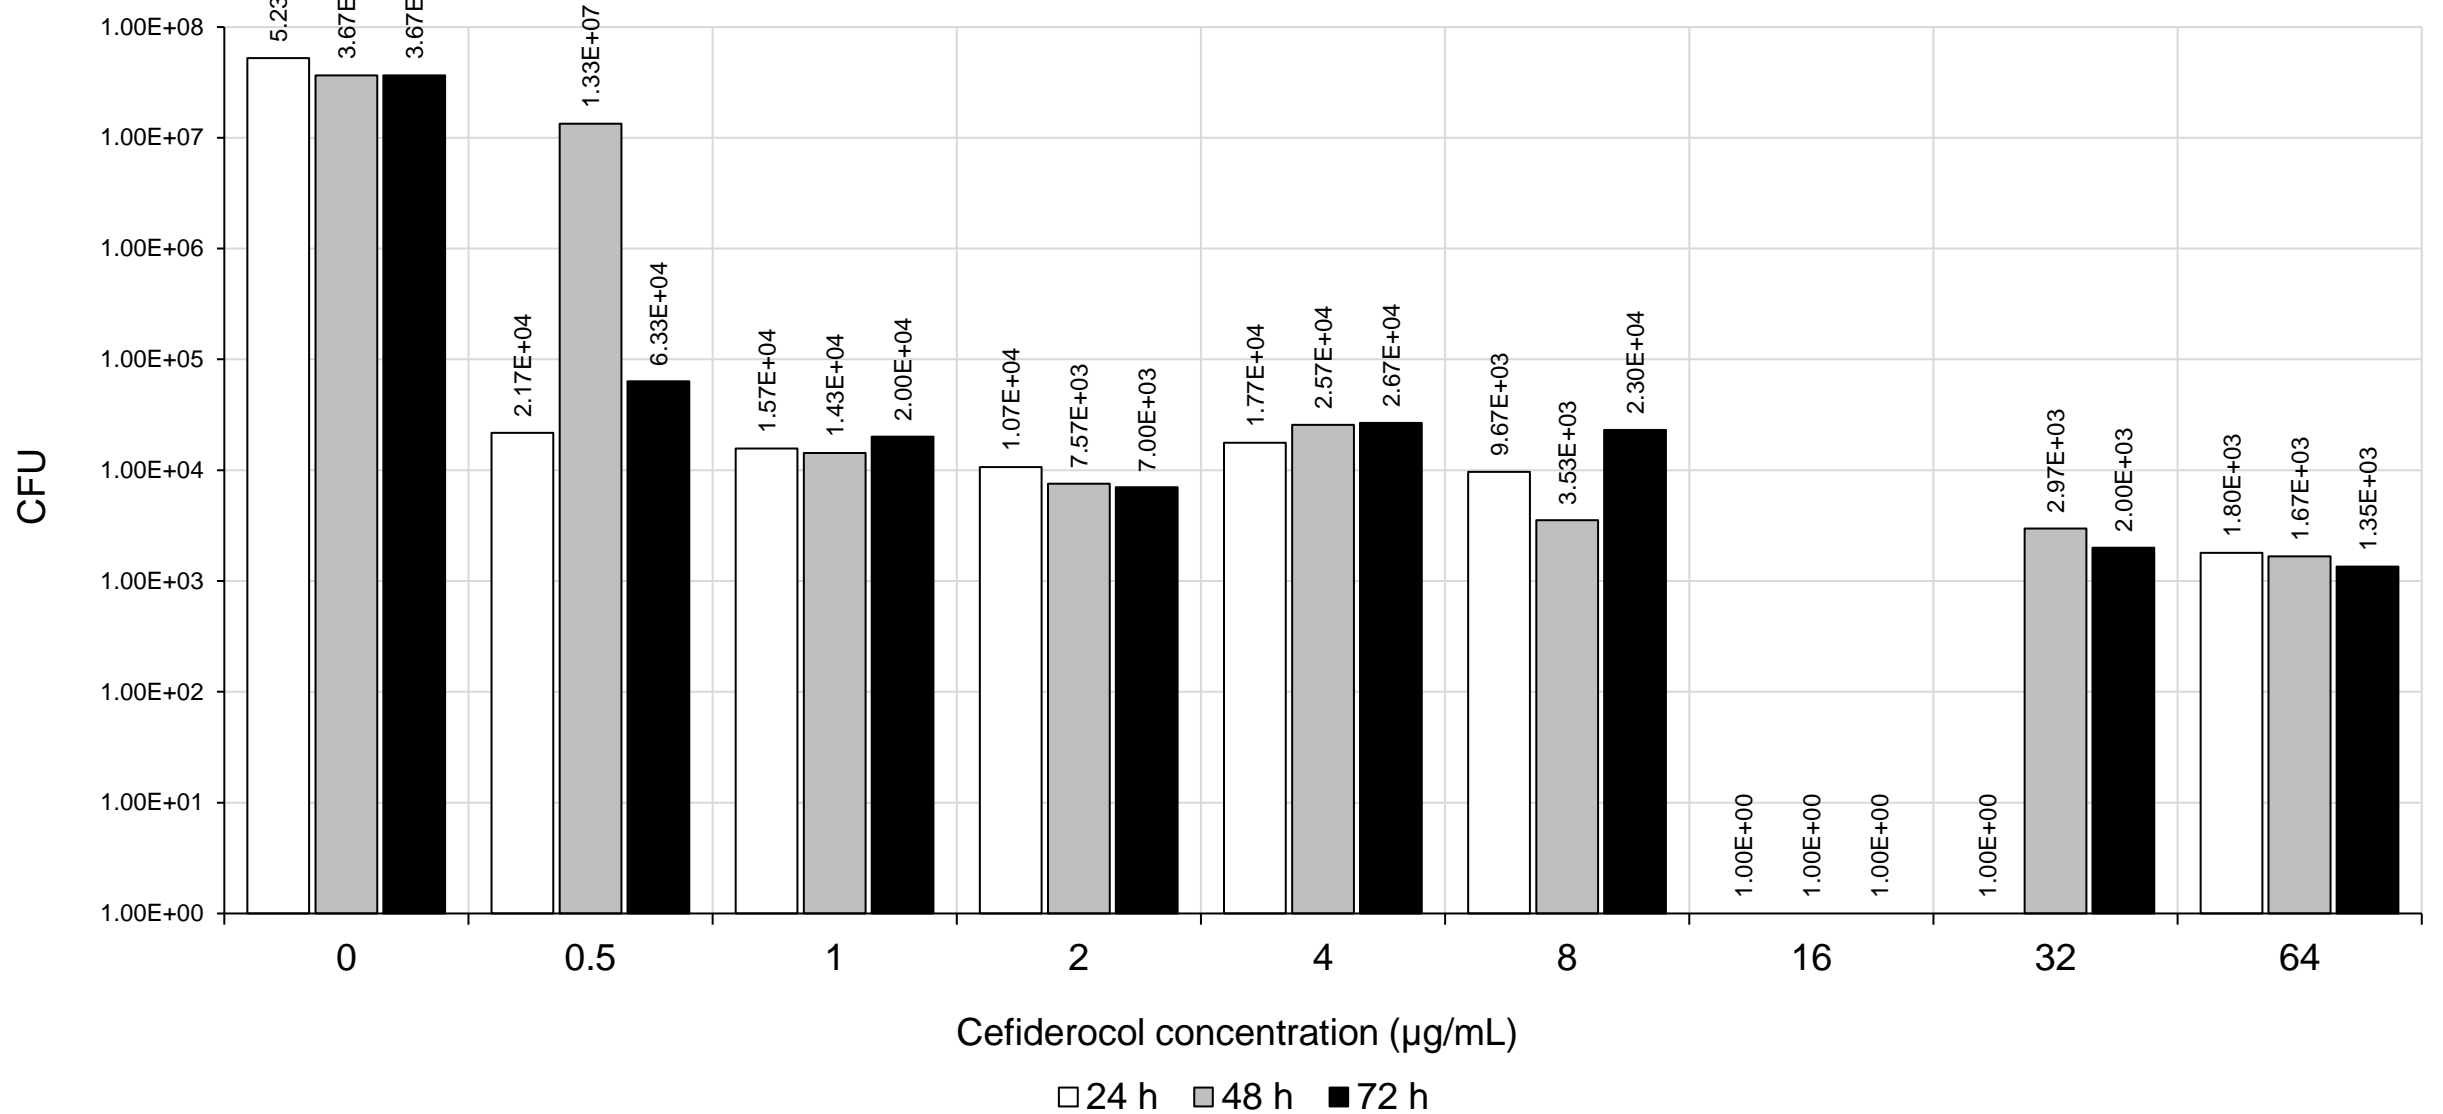

Isolate 1748108

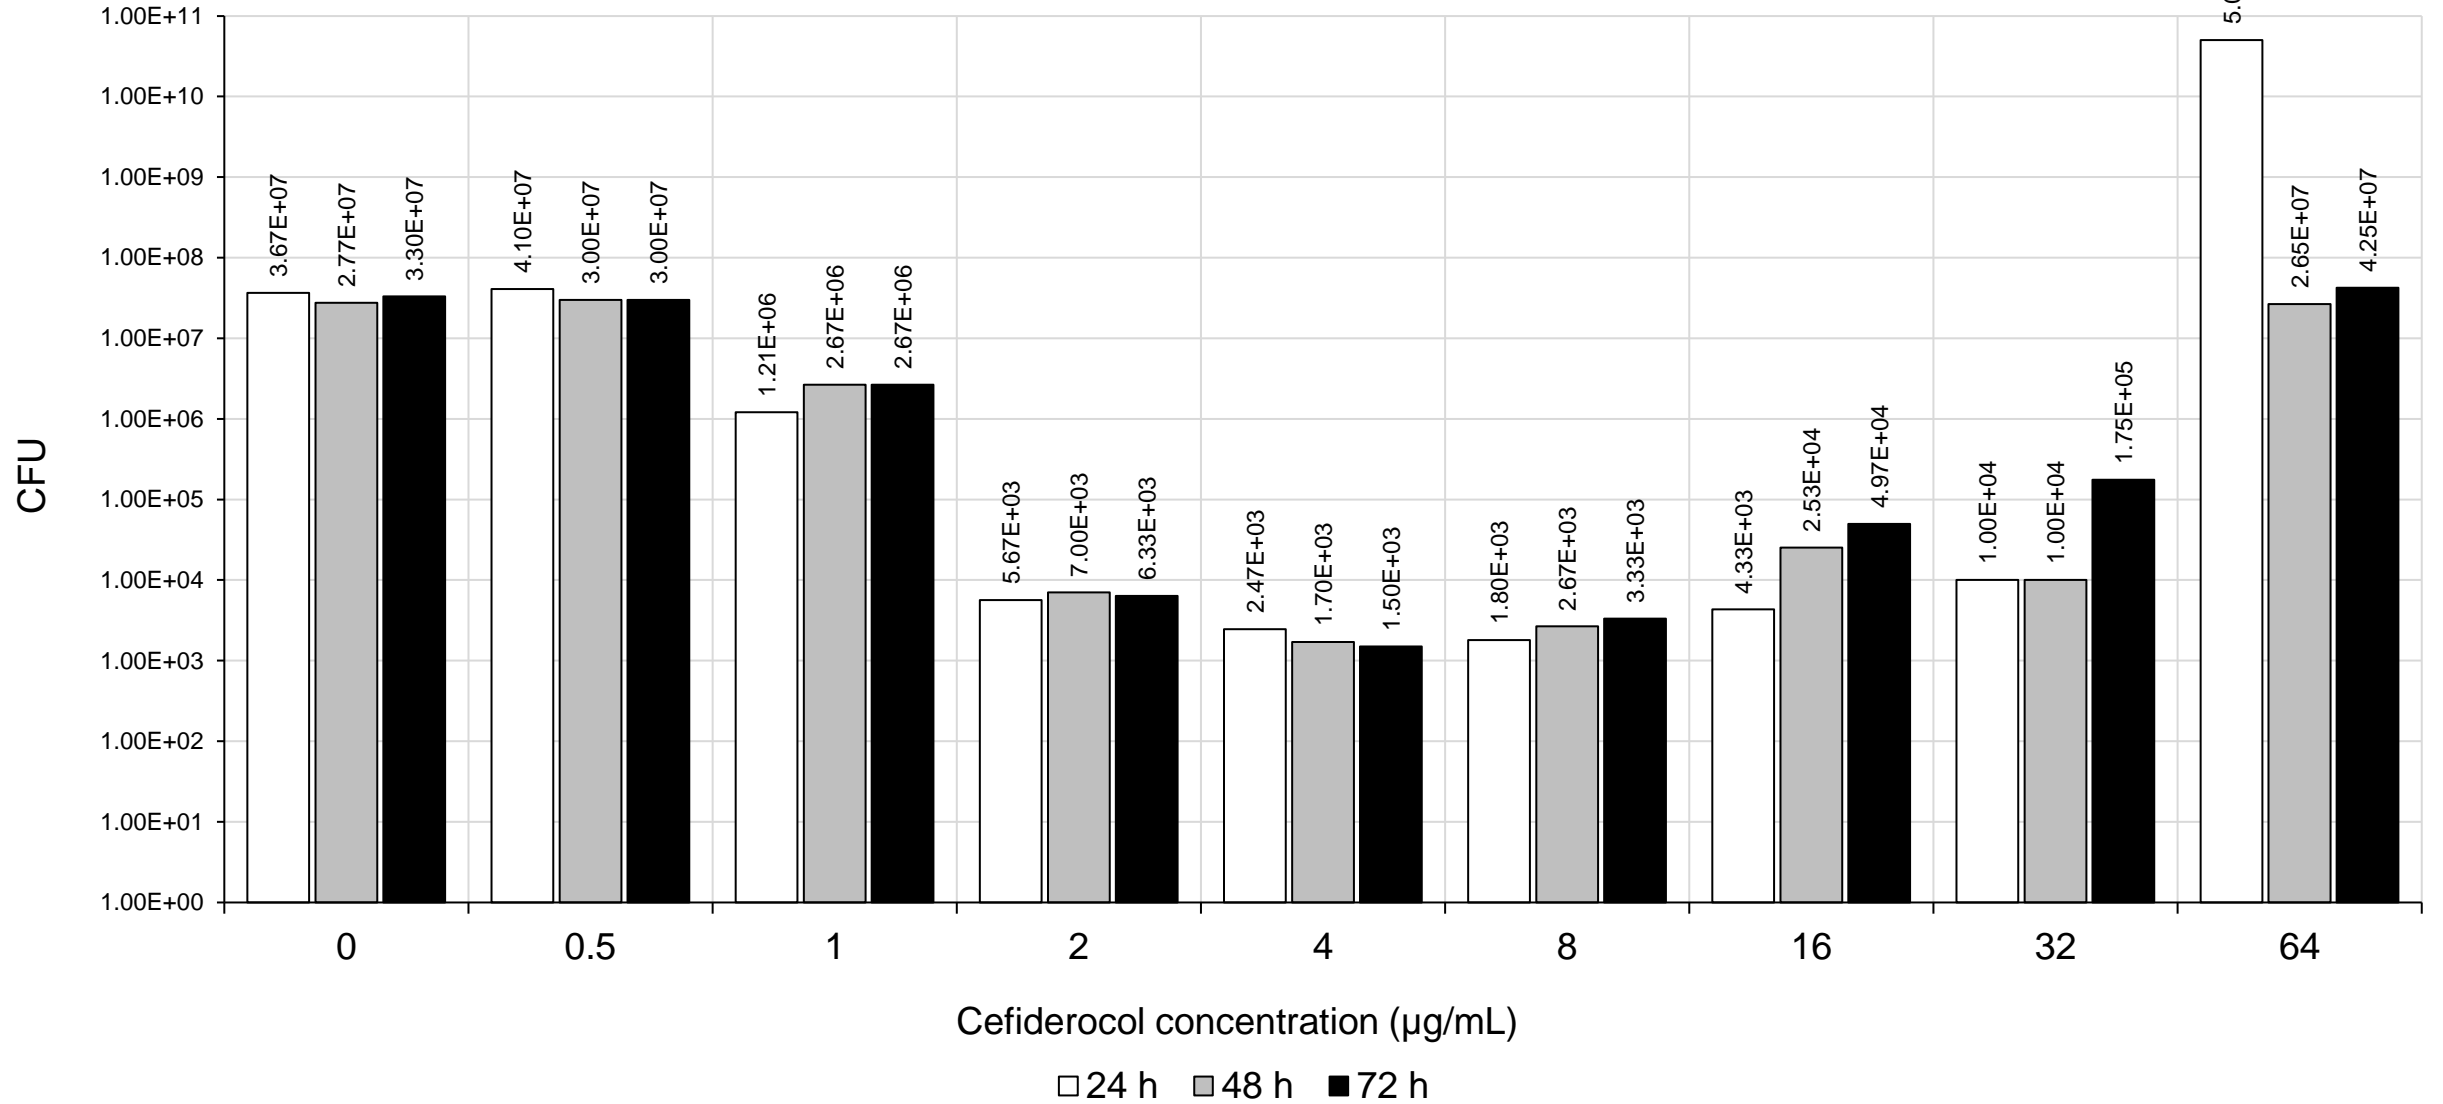

Isolate 1761874

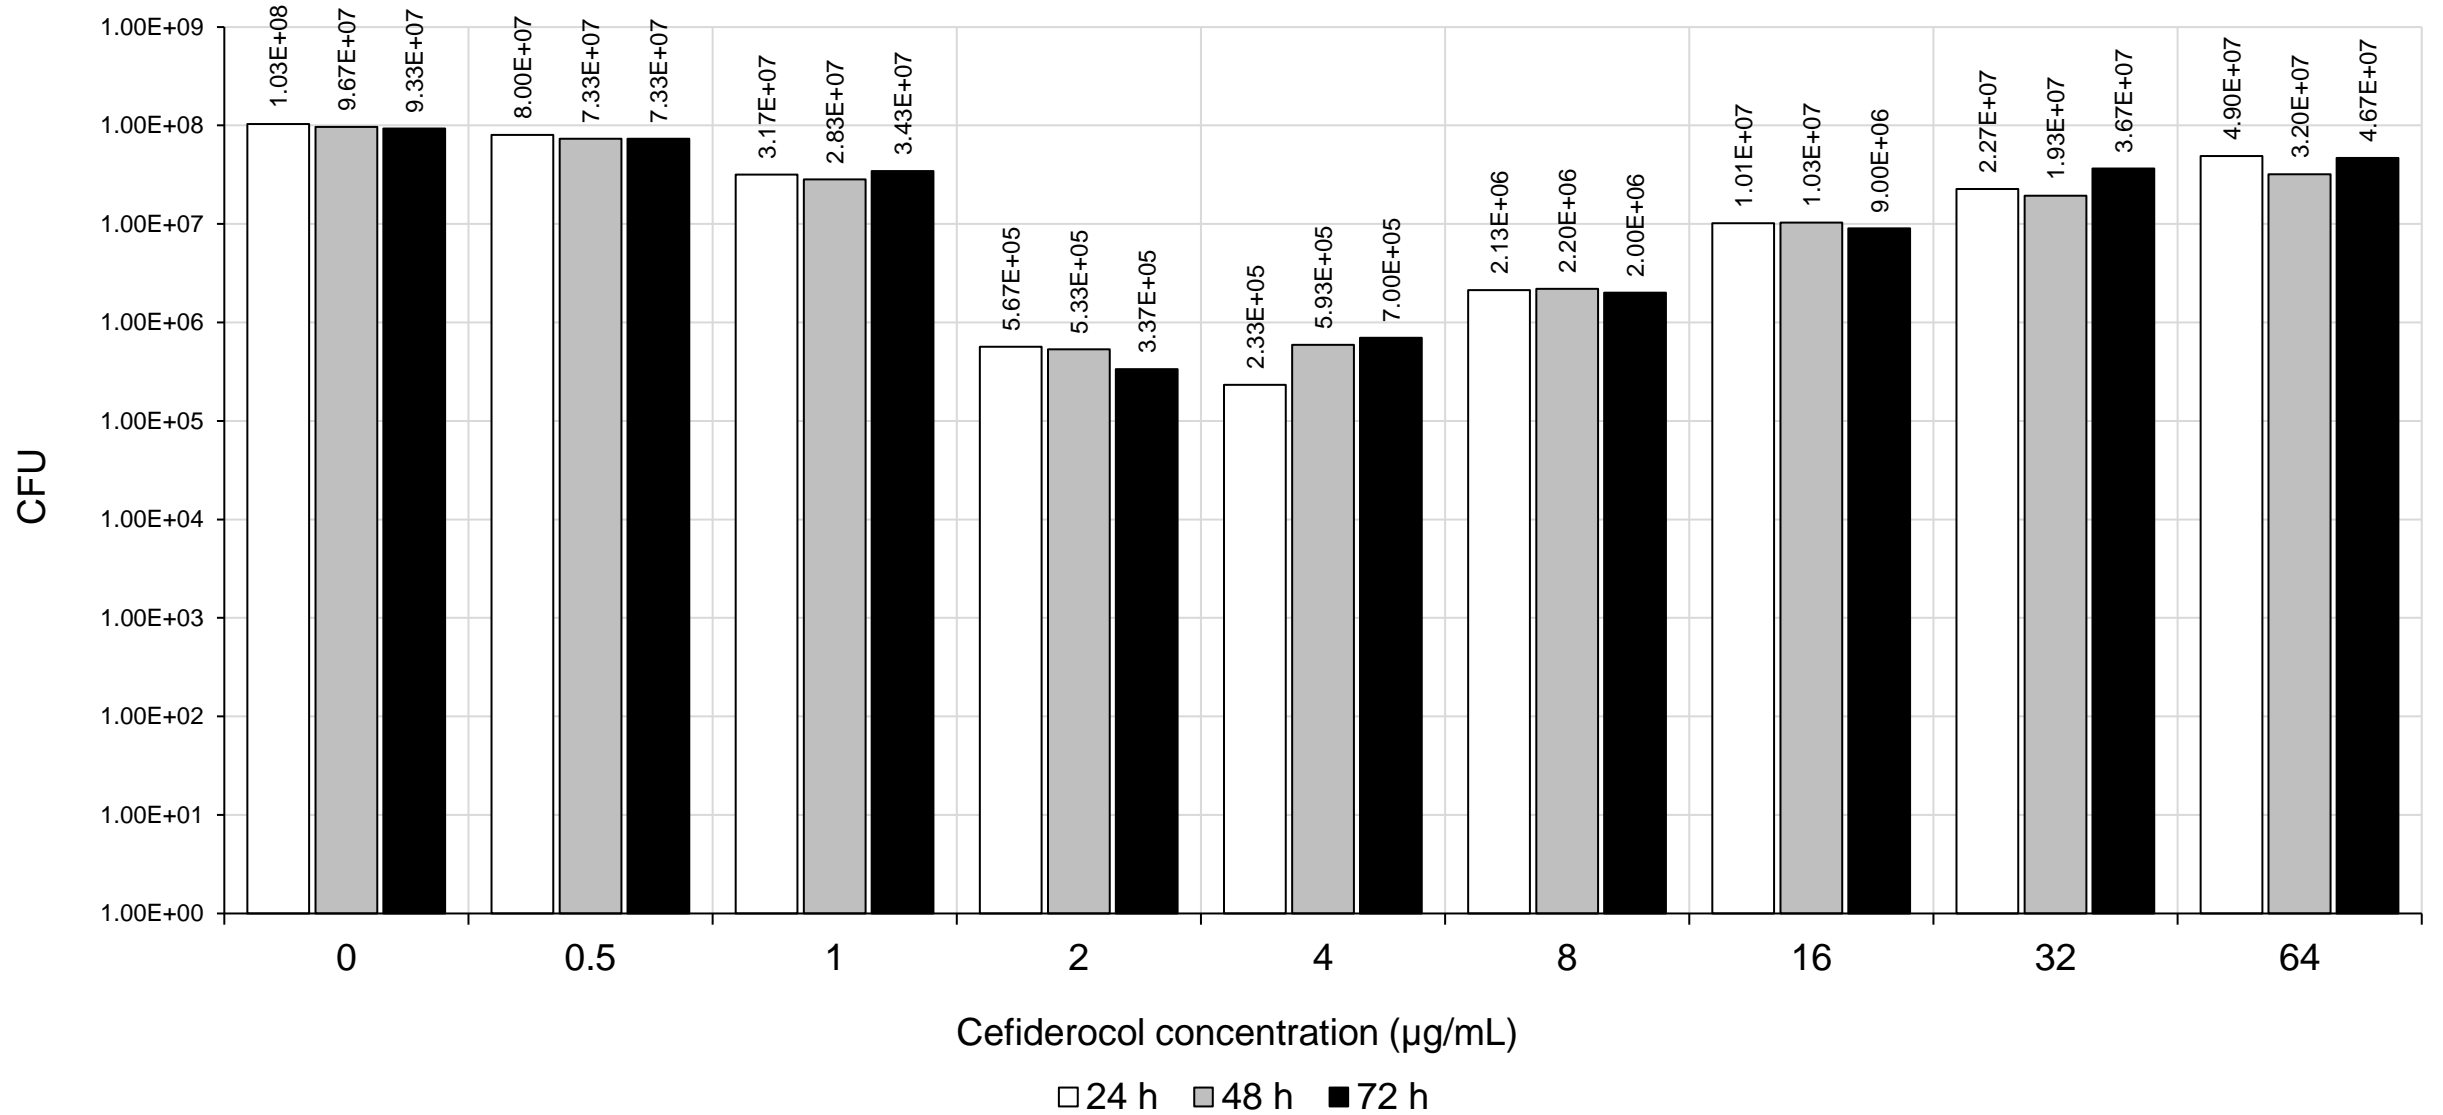

CFU, colony-forming unit; PAP, population analysis profiling; R, resistant.

Supplementary Fig S1.22.

Growth profile of carbapenem-resistant *Acinetobacter calcoaceticus-baumannii* complex by PAP method

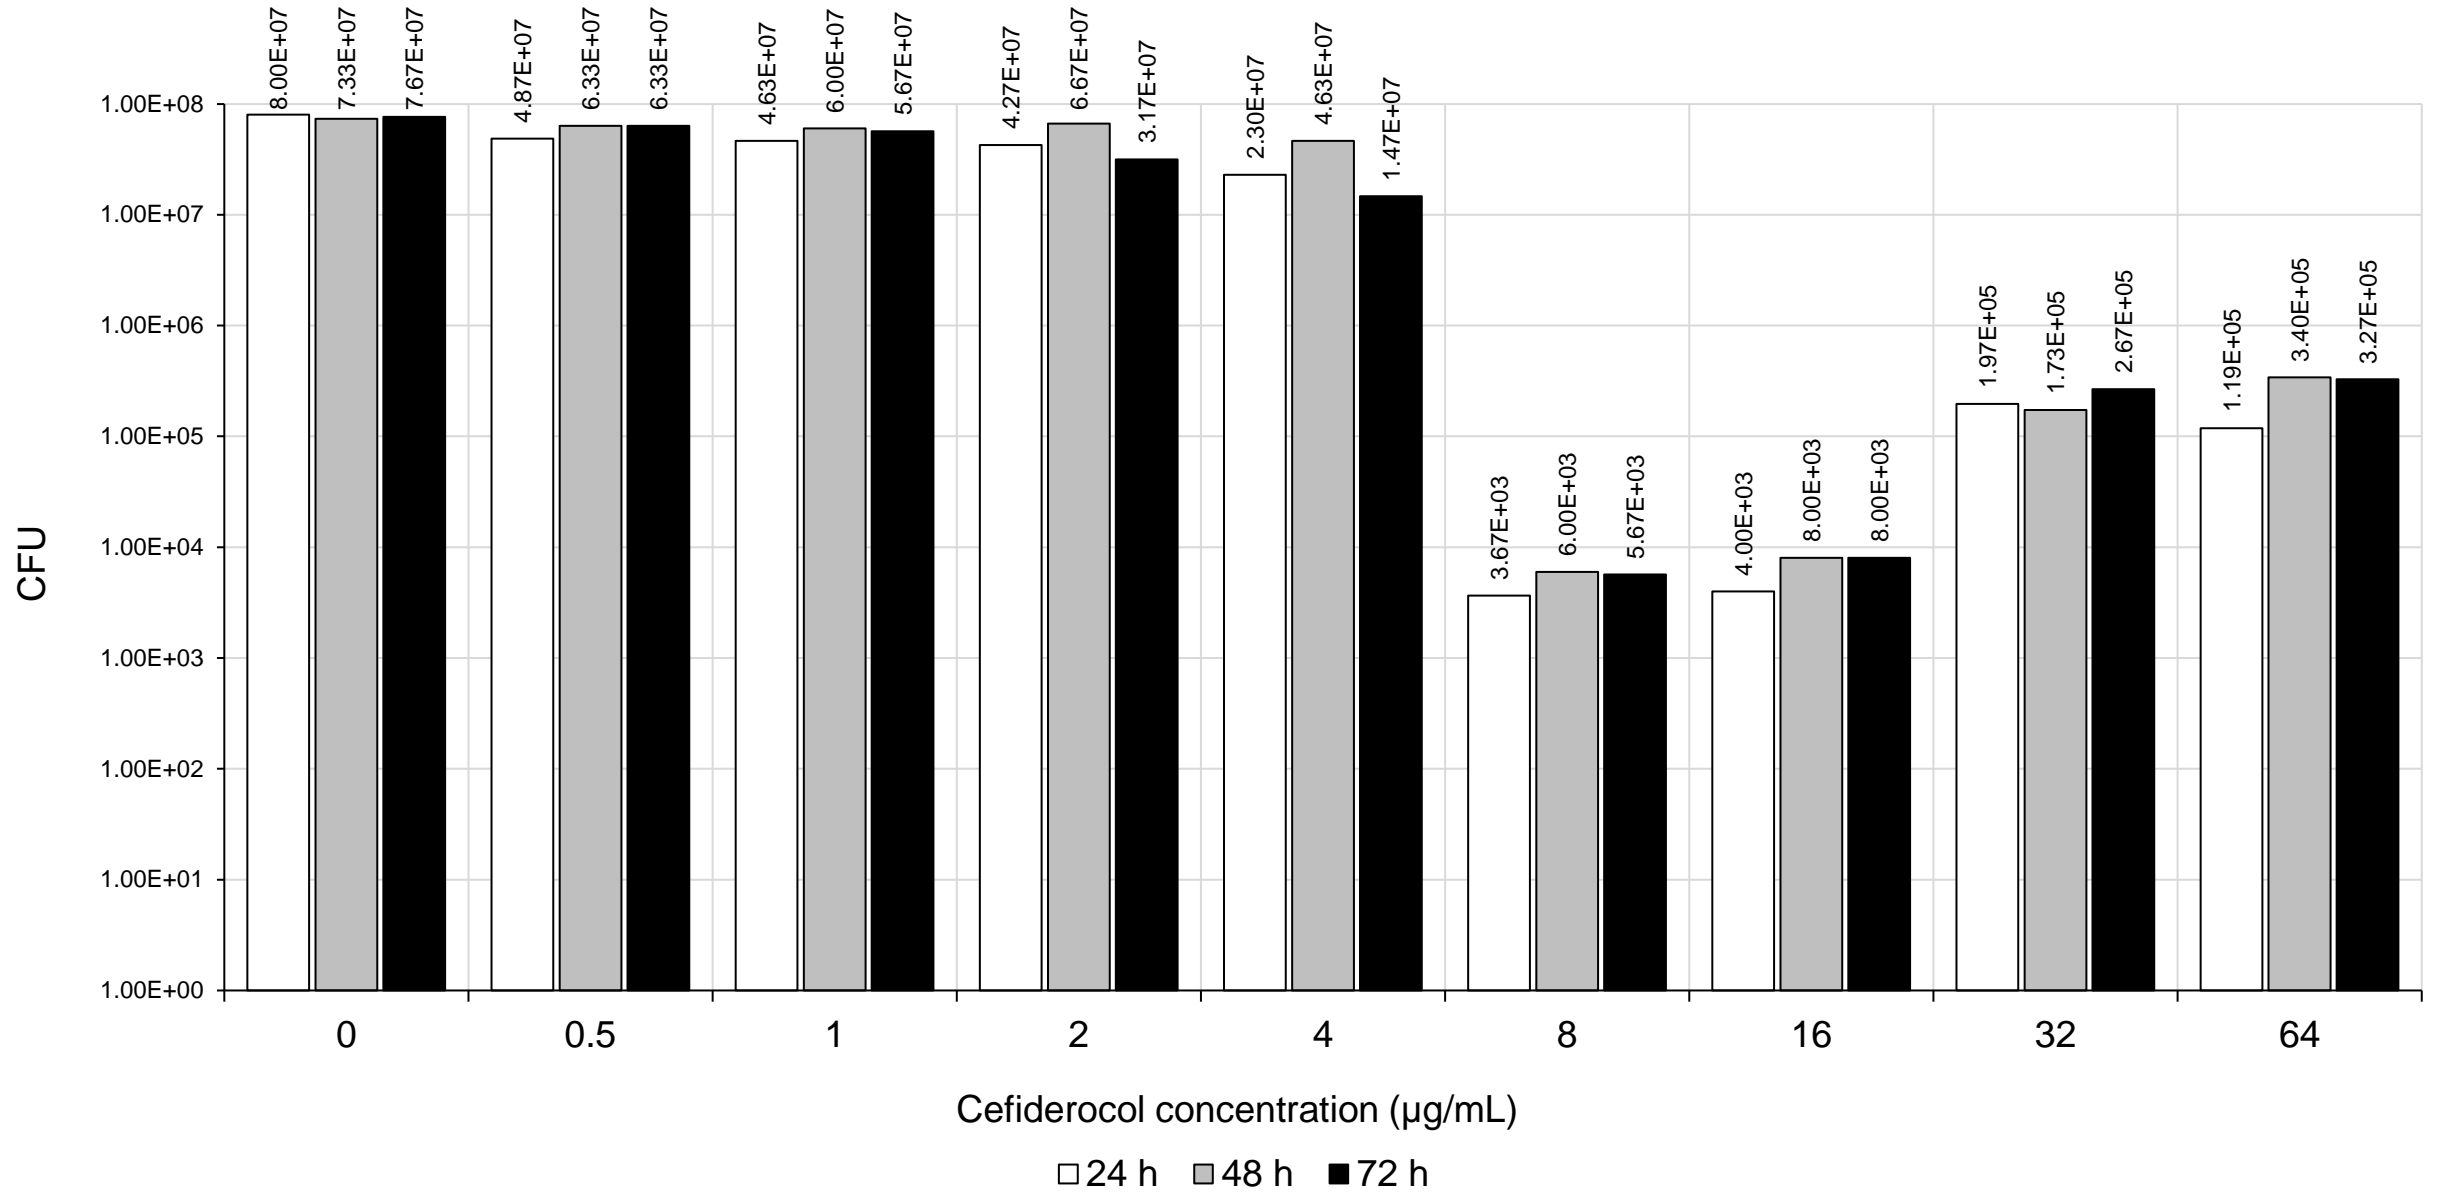



Isolate 1849942

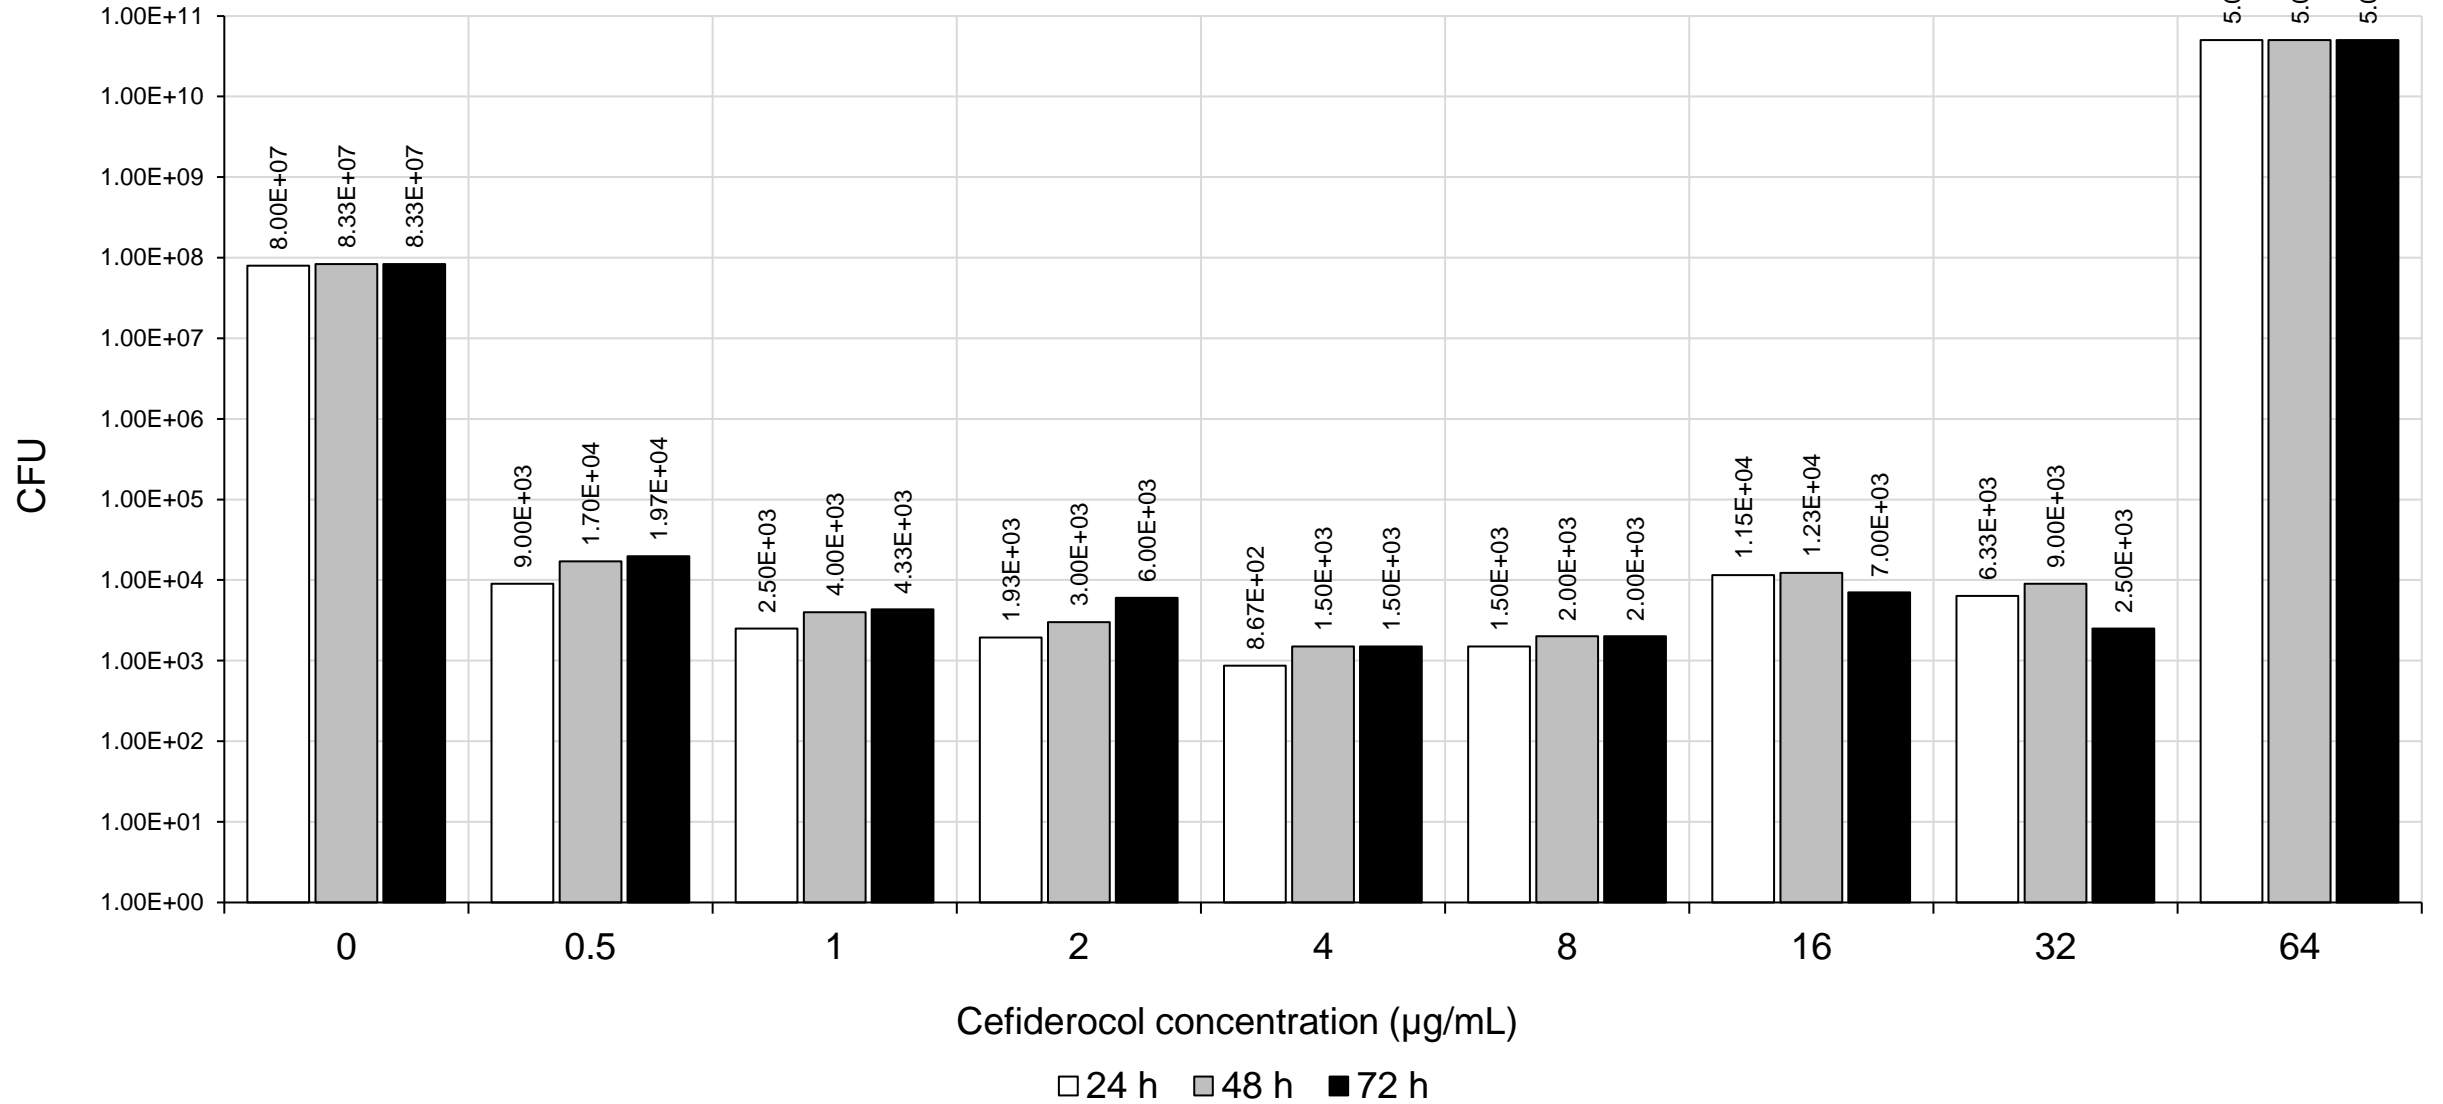

CFU, colony-forming unit; PAP, population analysis profiling; R, resistant.

Isolate 1848635

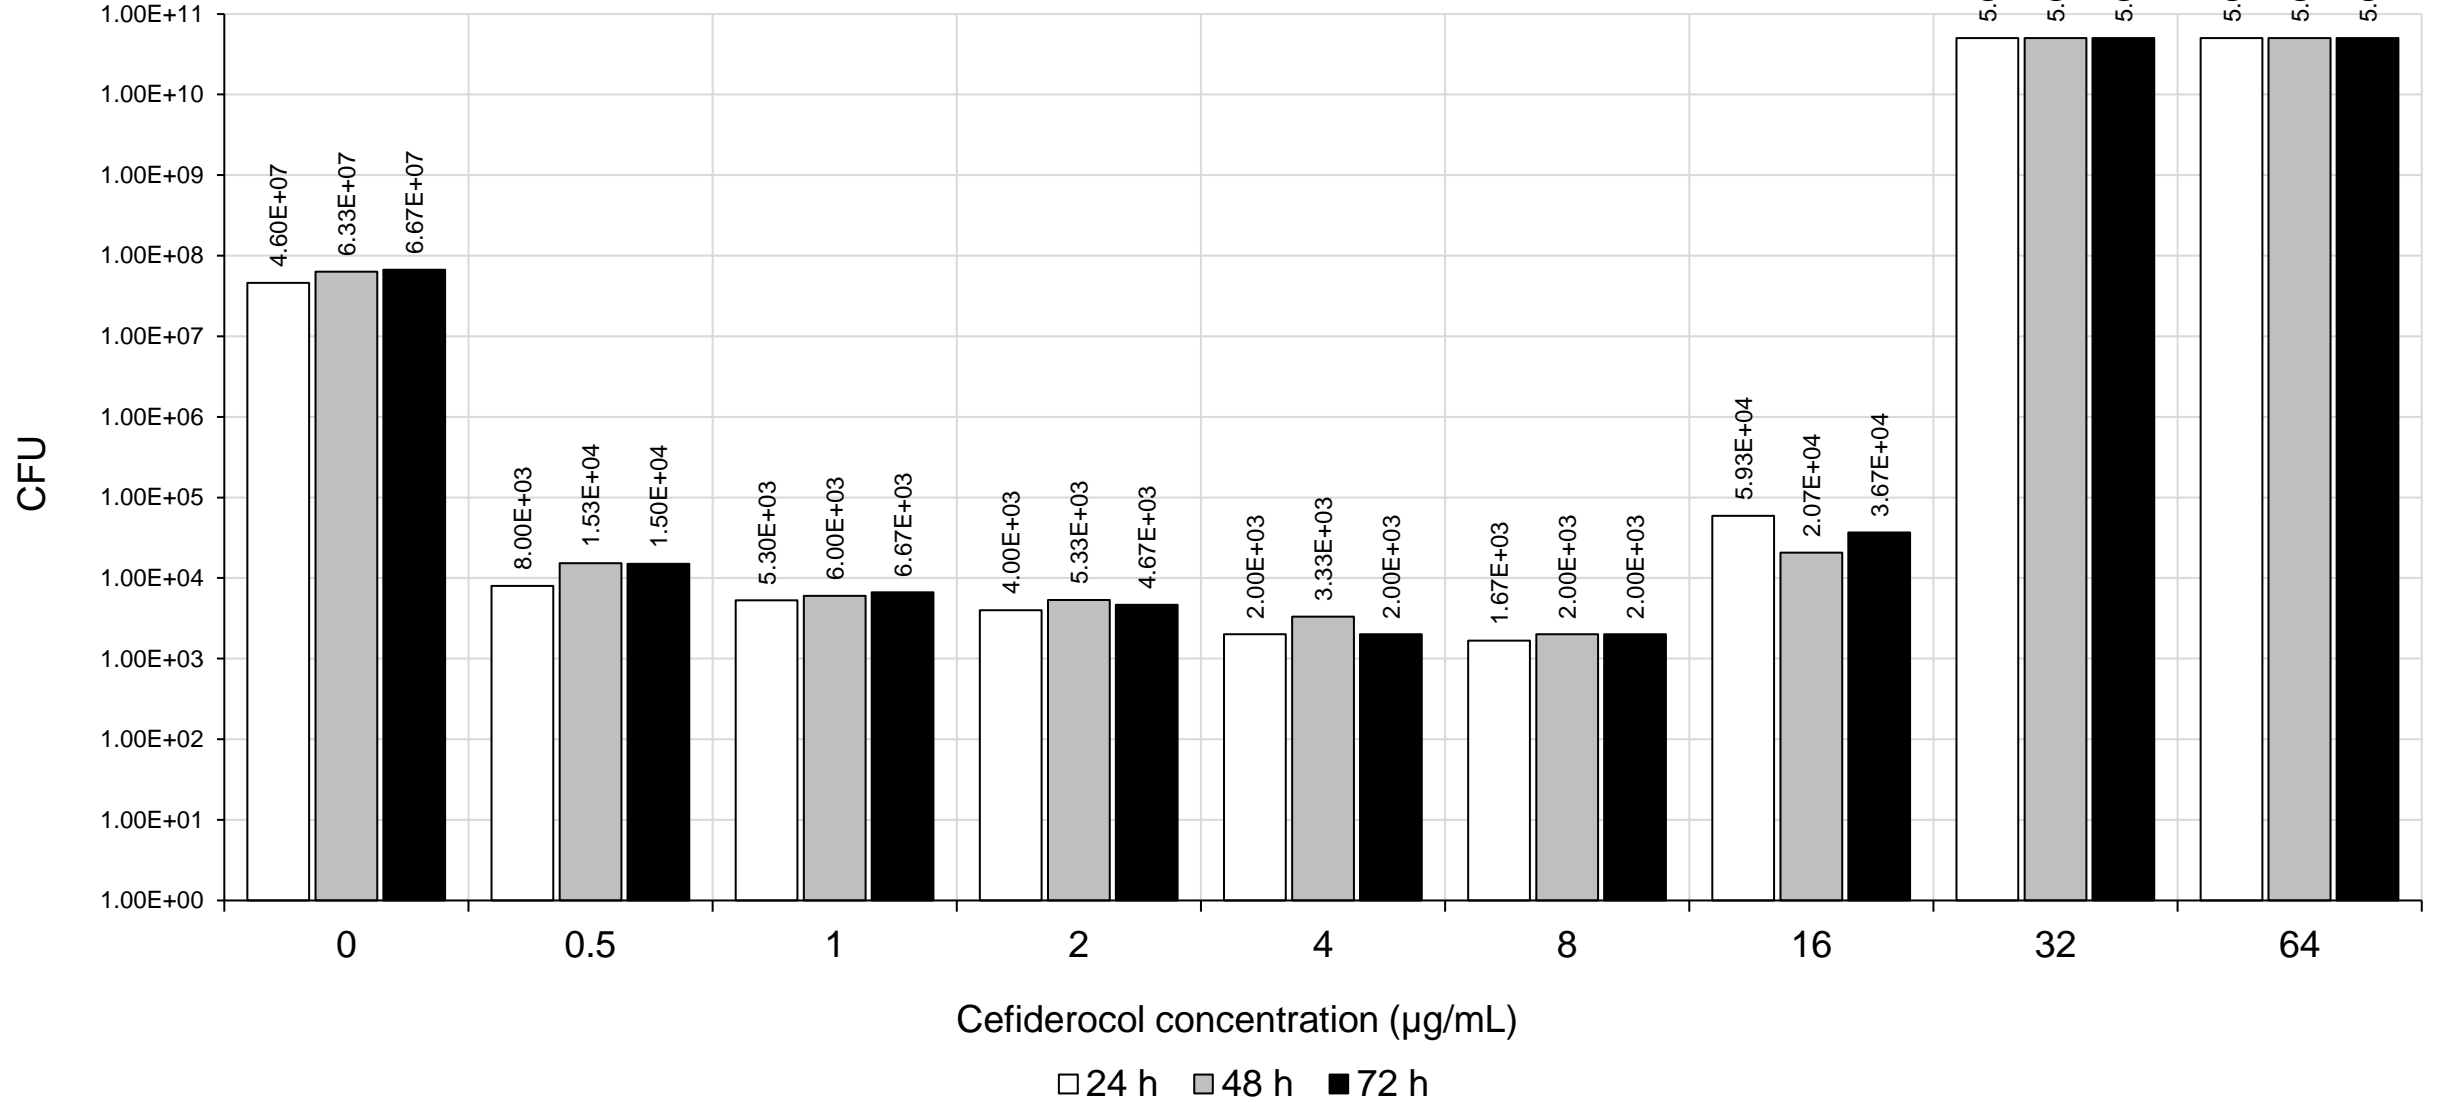

Isolate 1864503

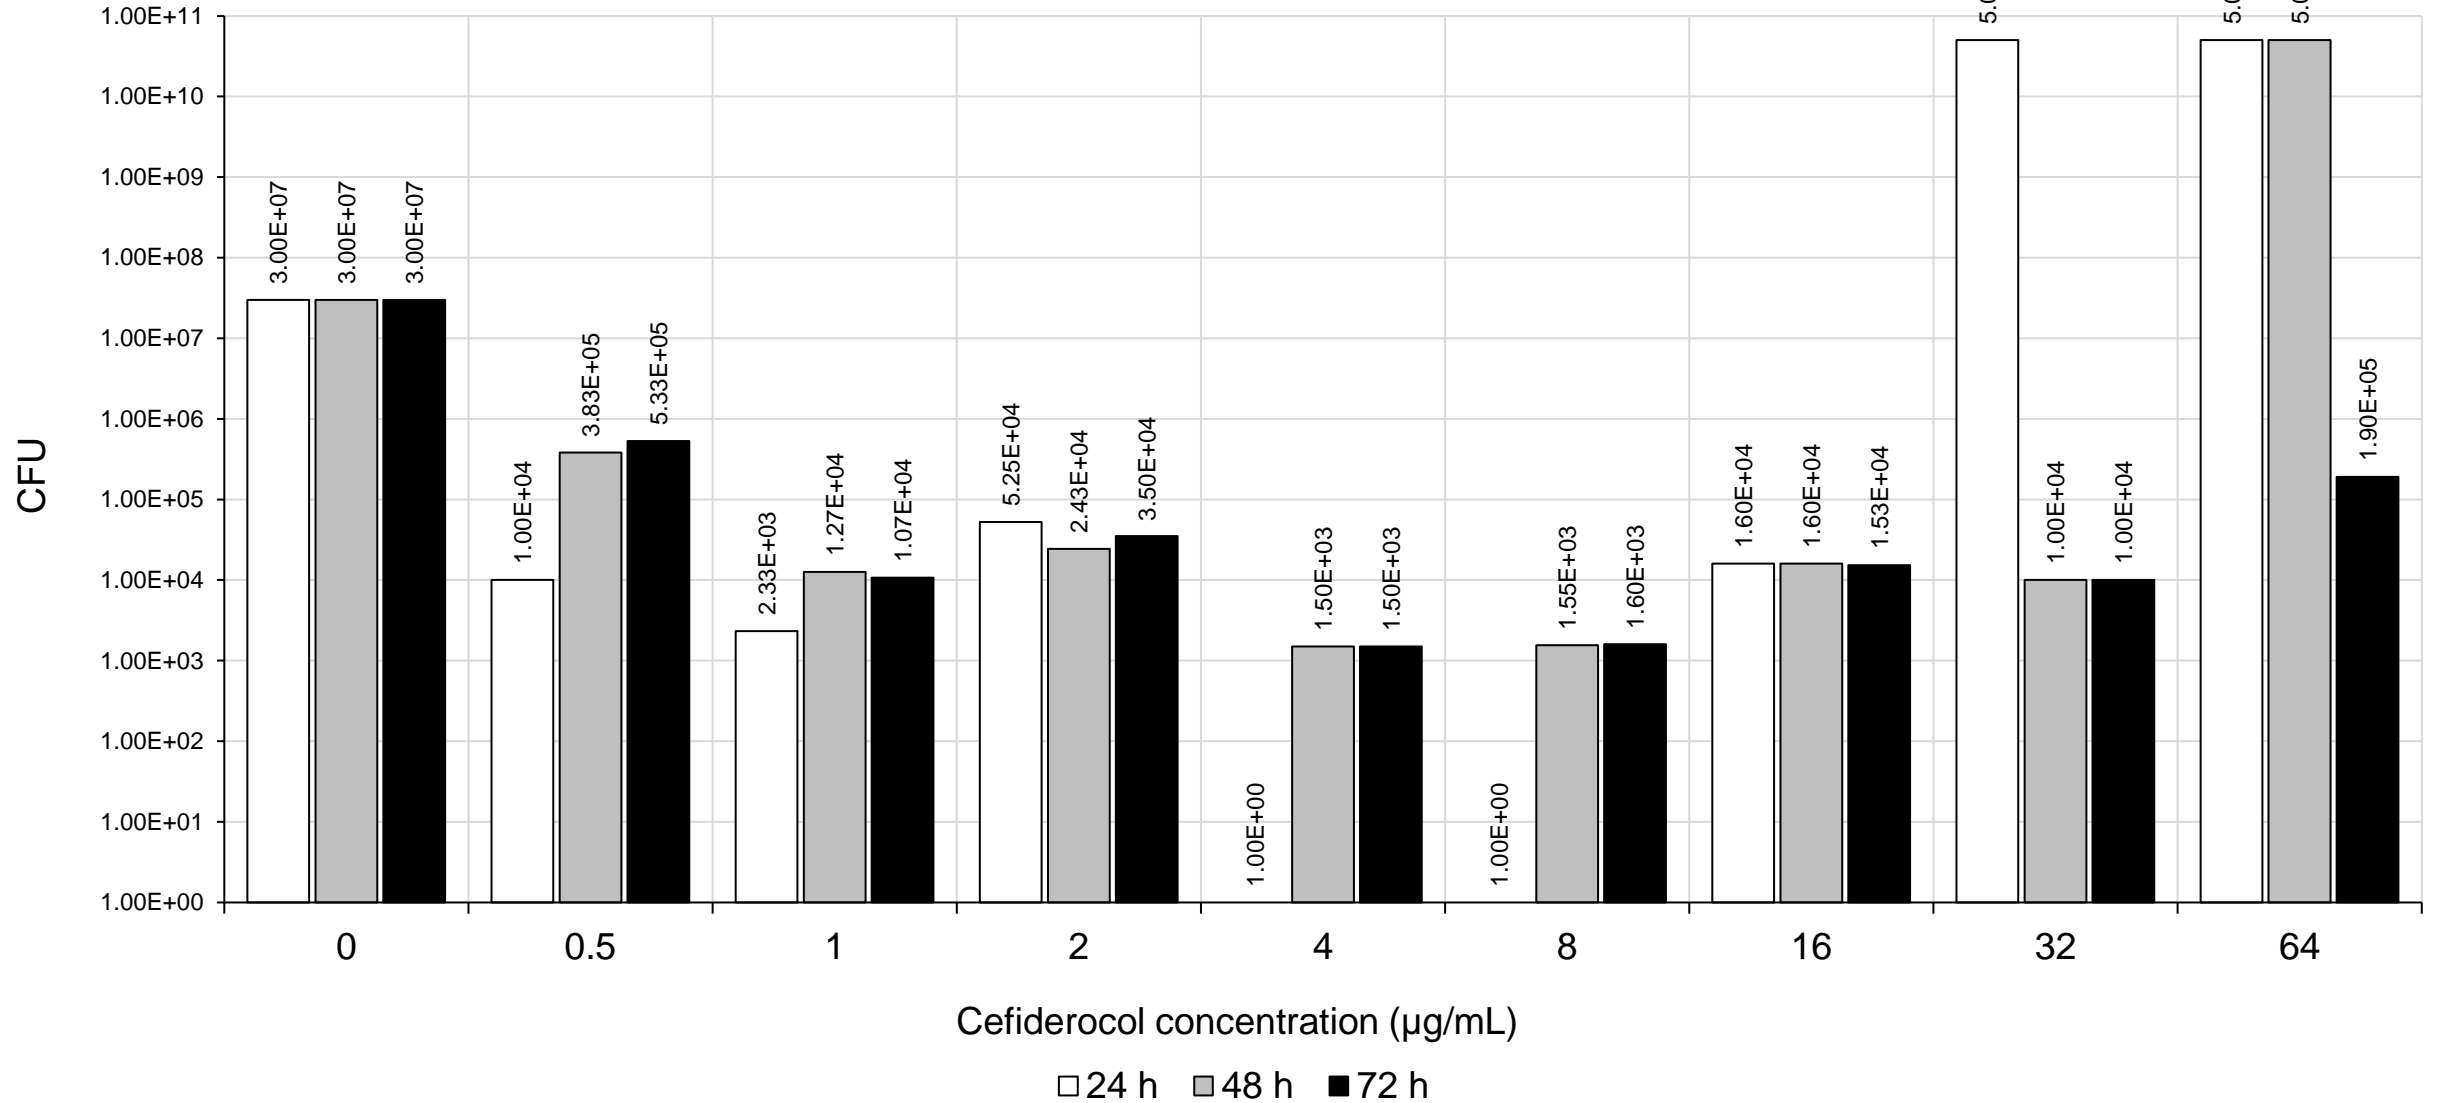

Isolate 1901118

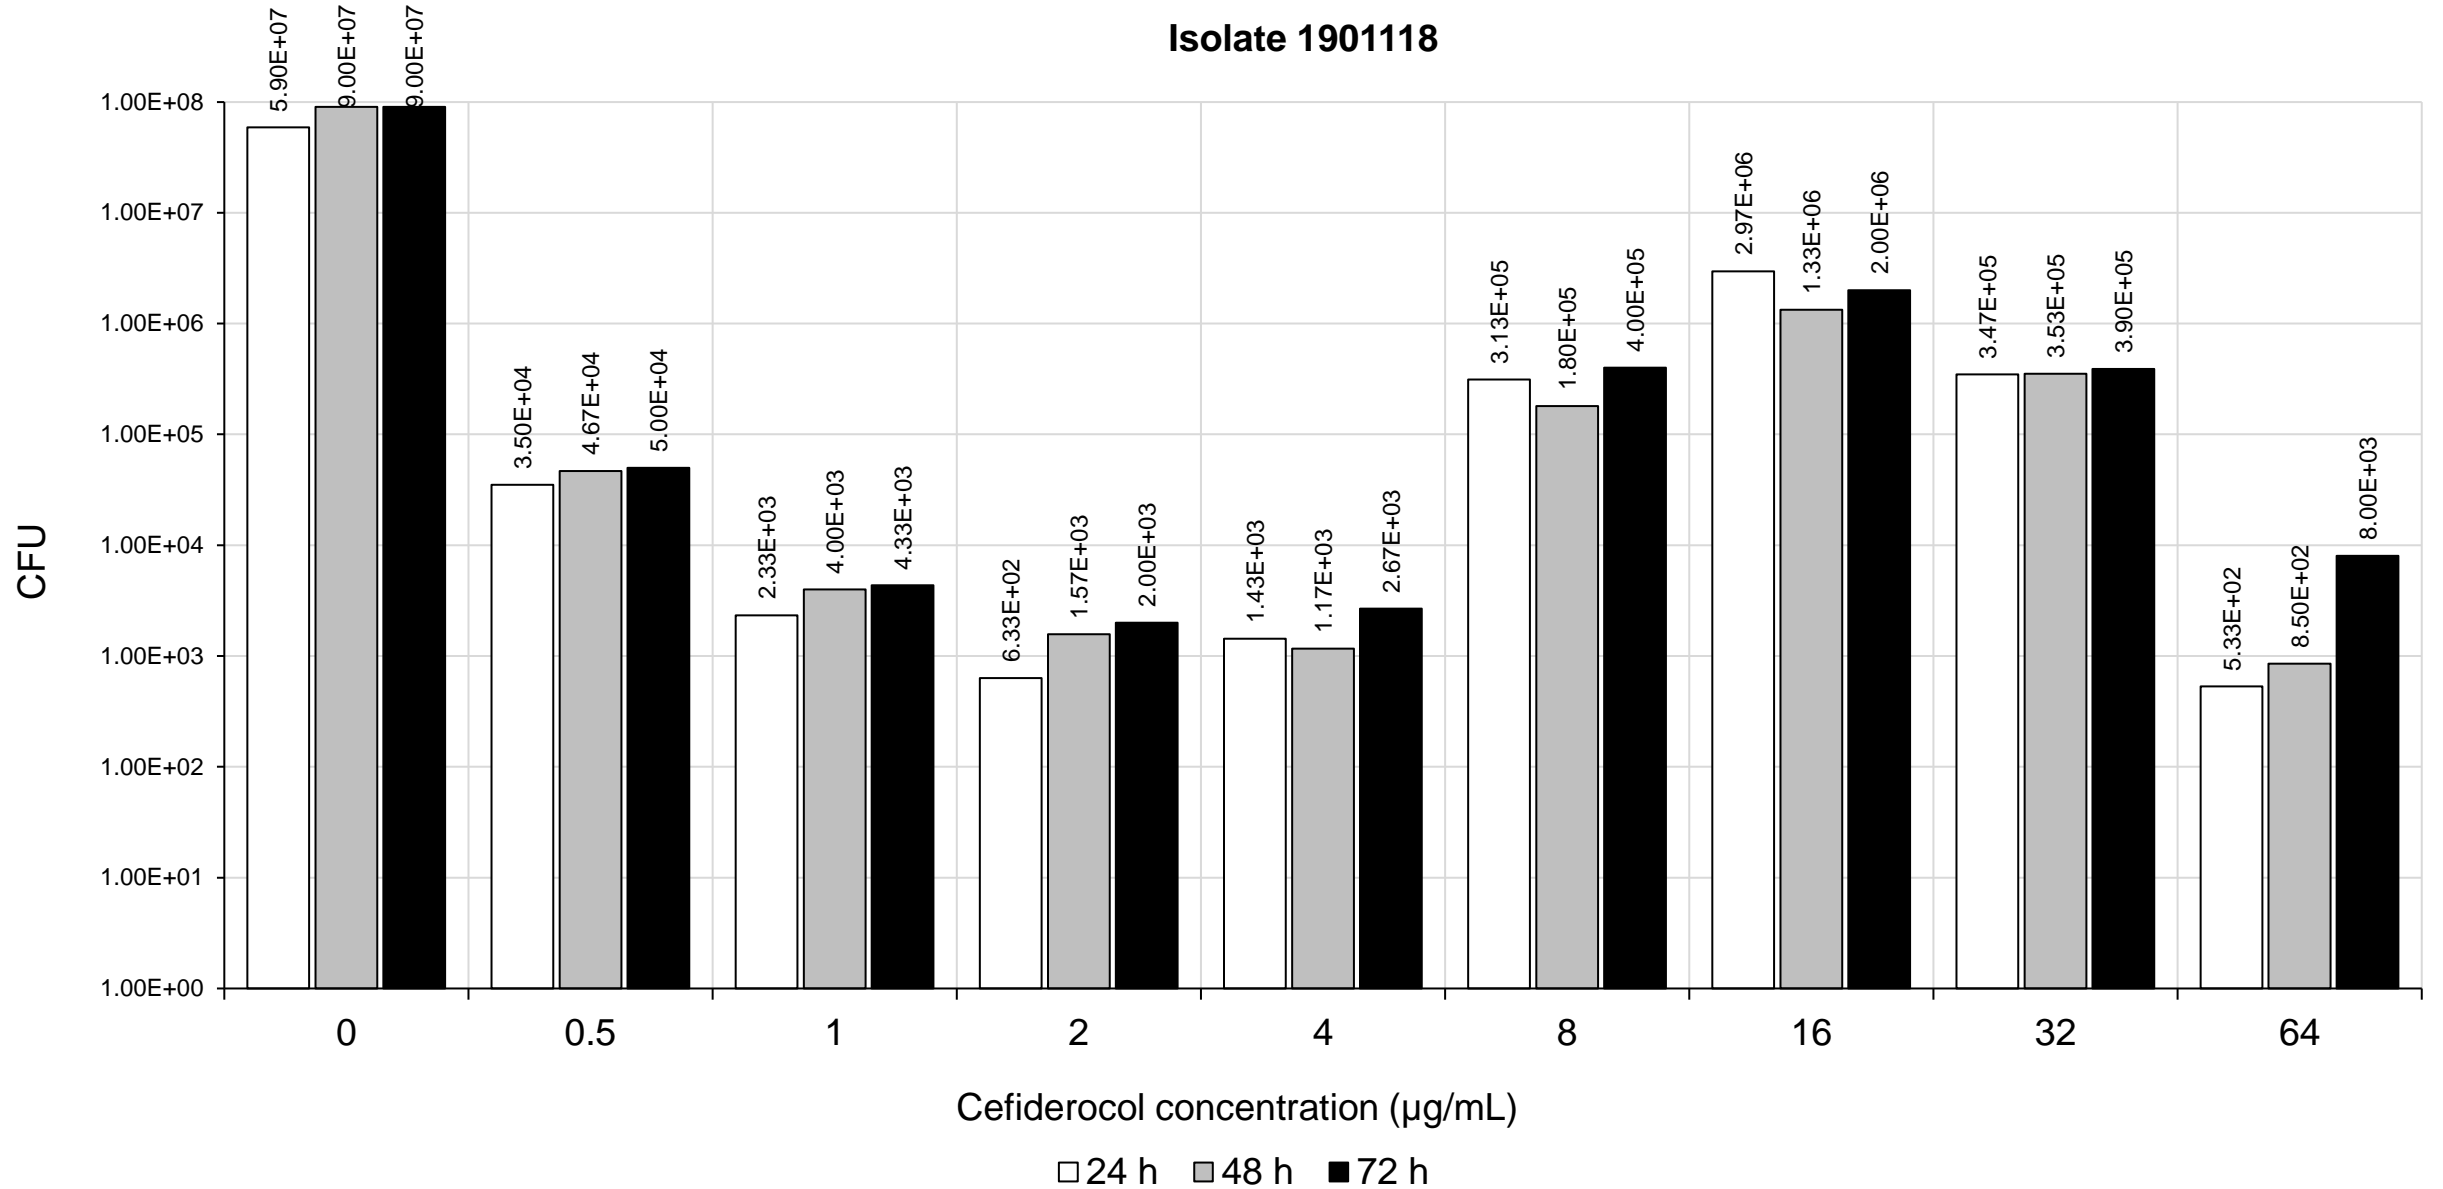

Isolate 1905717

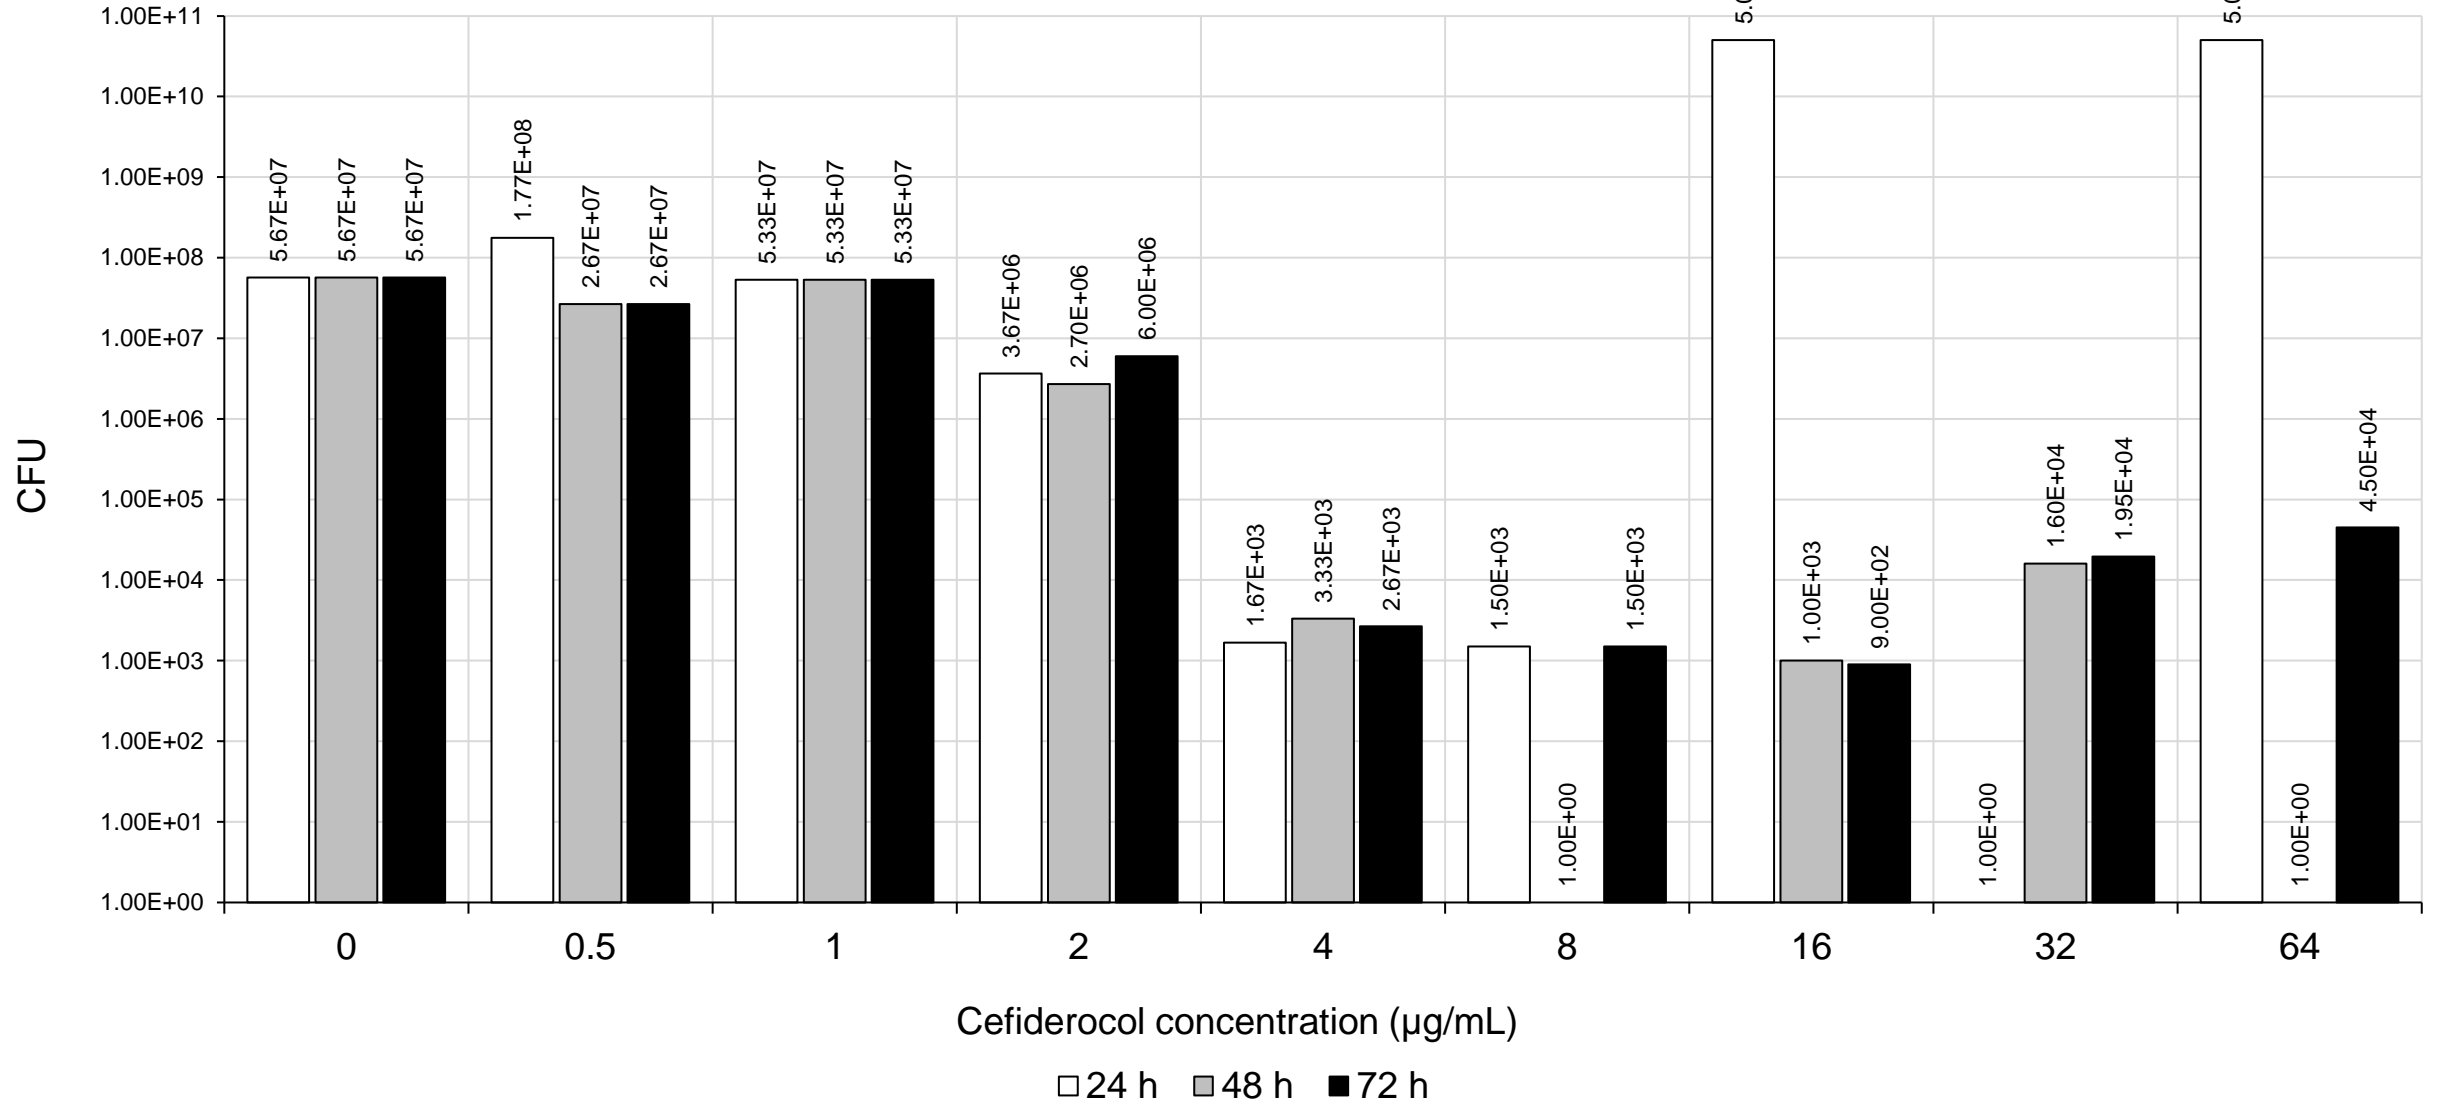

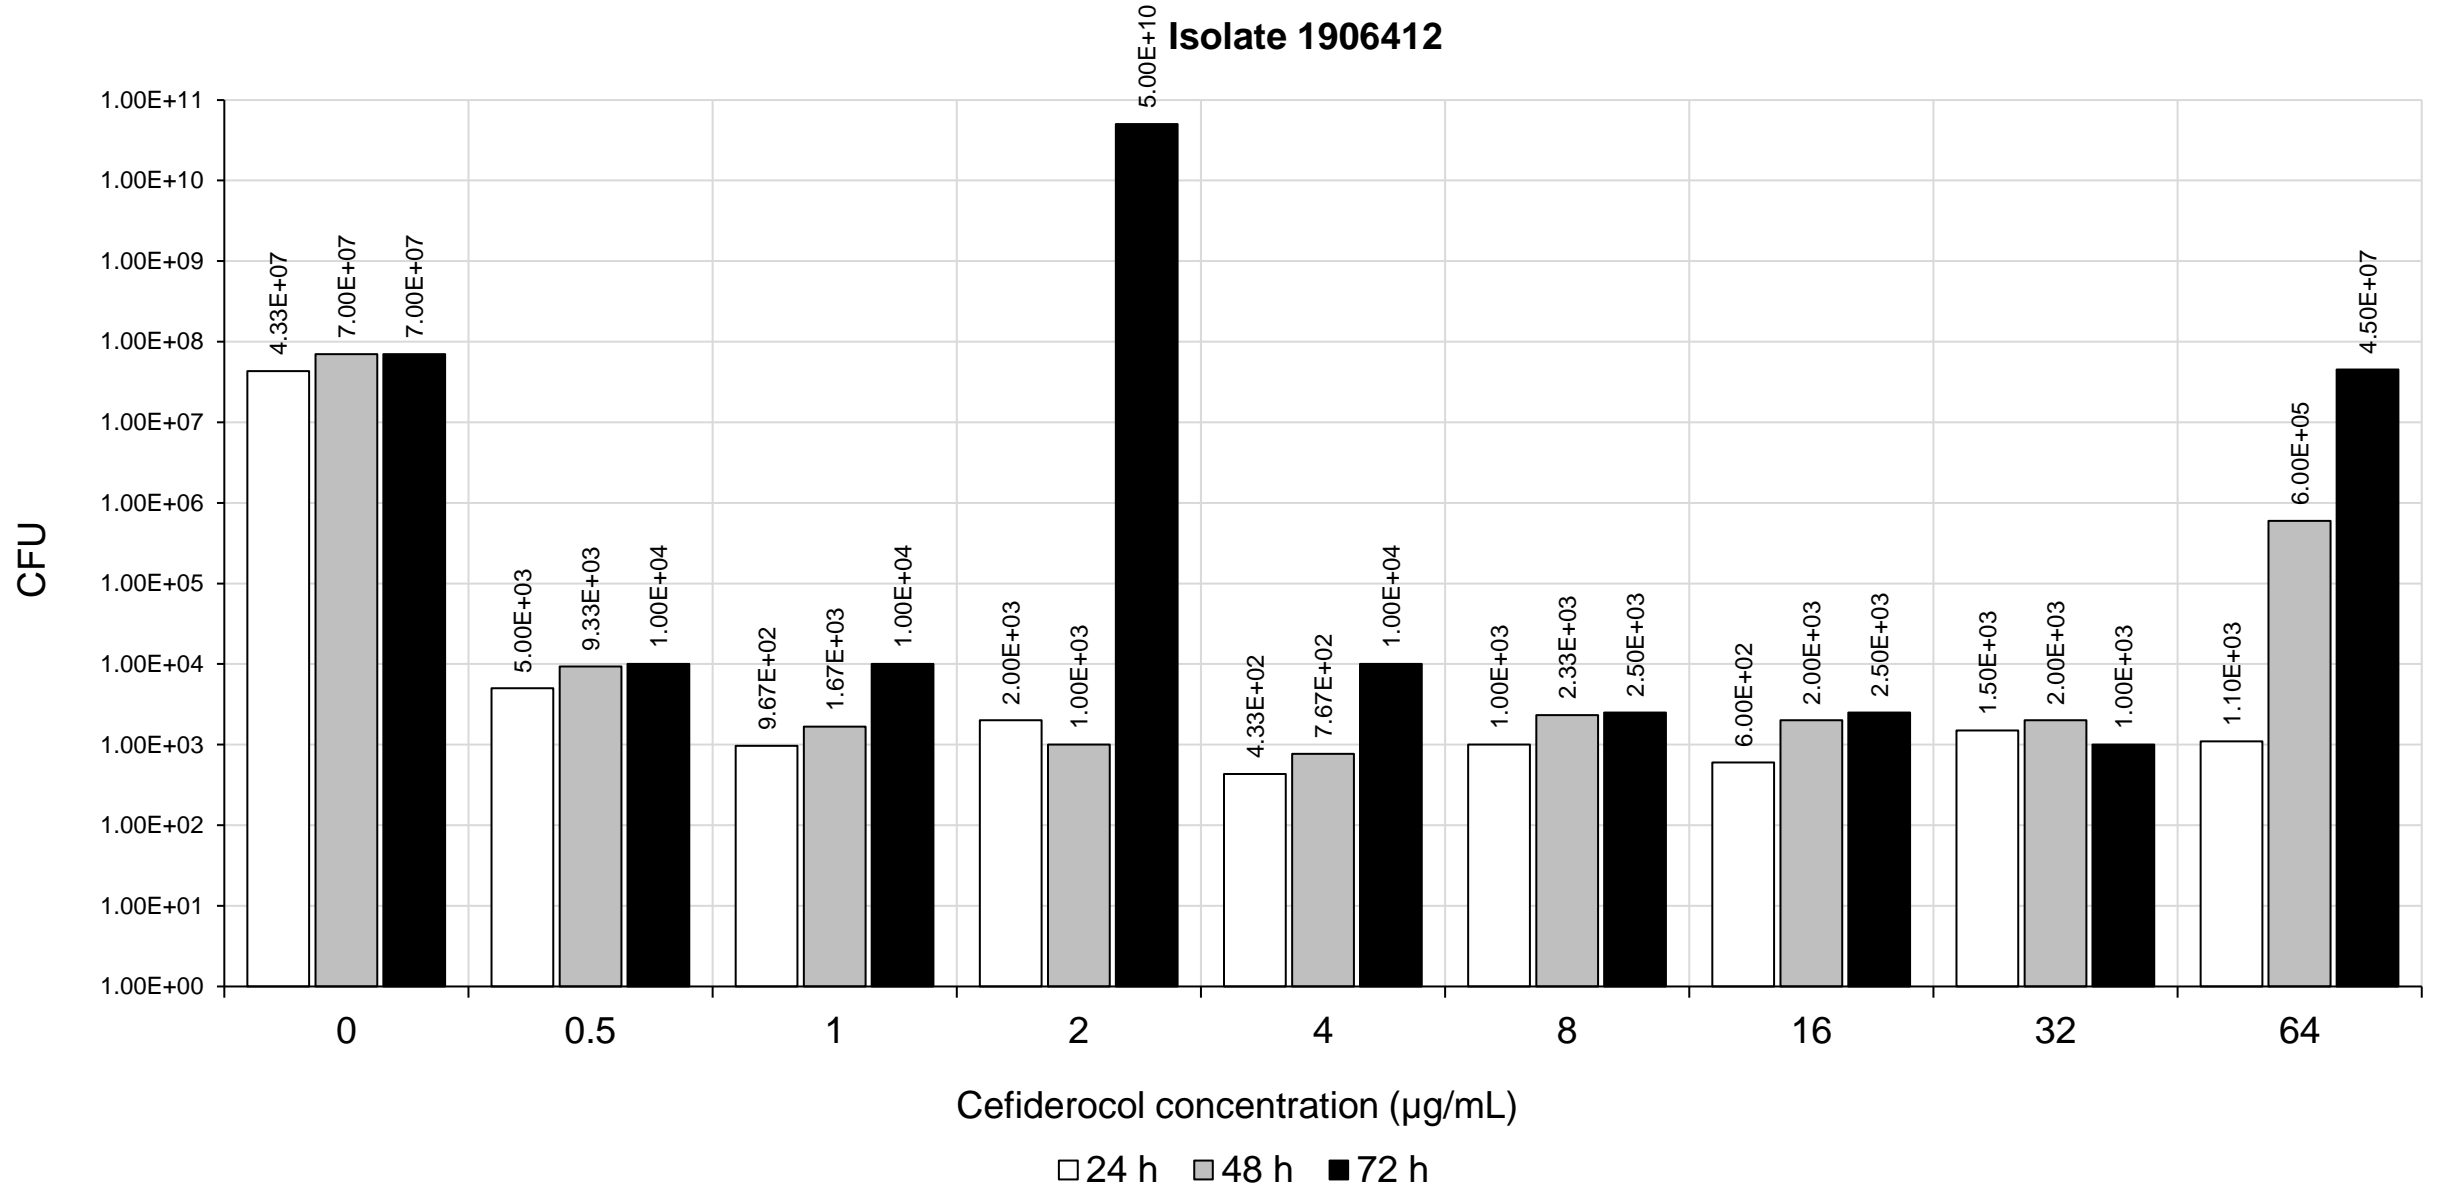

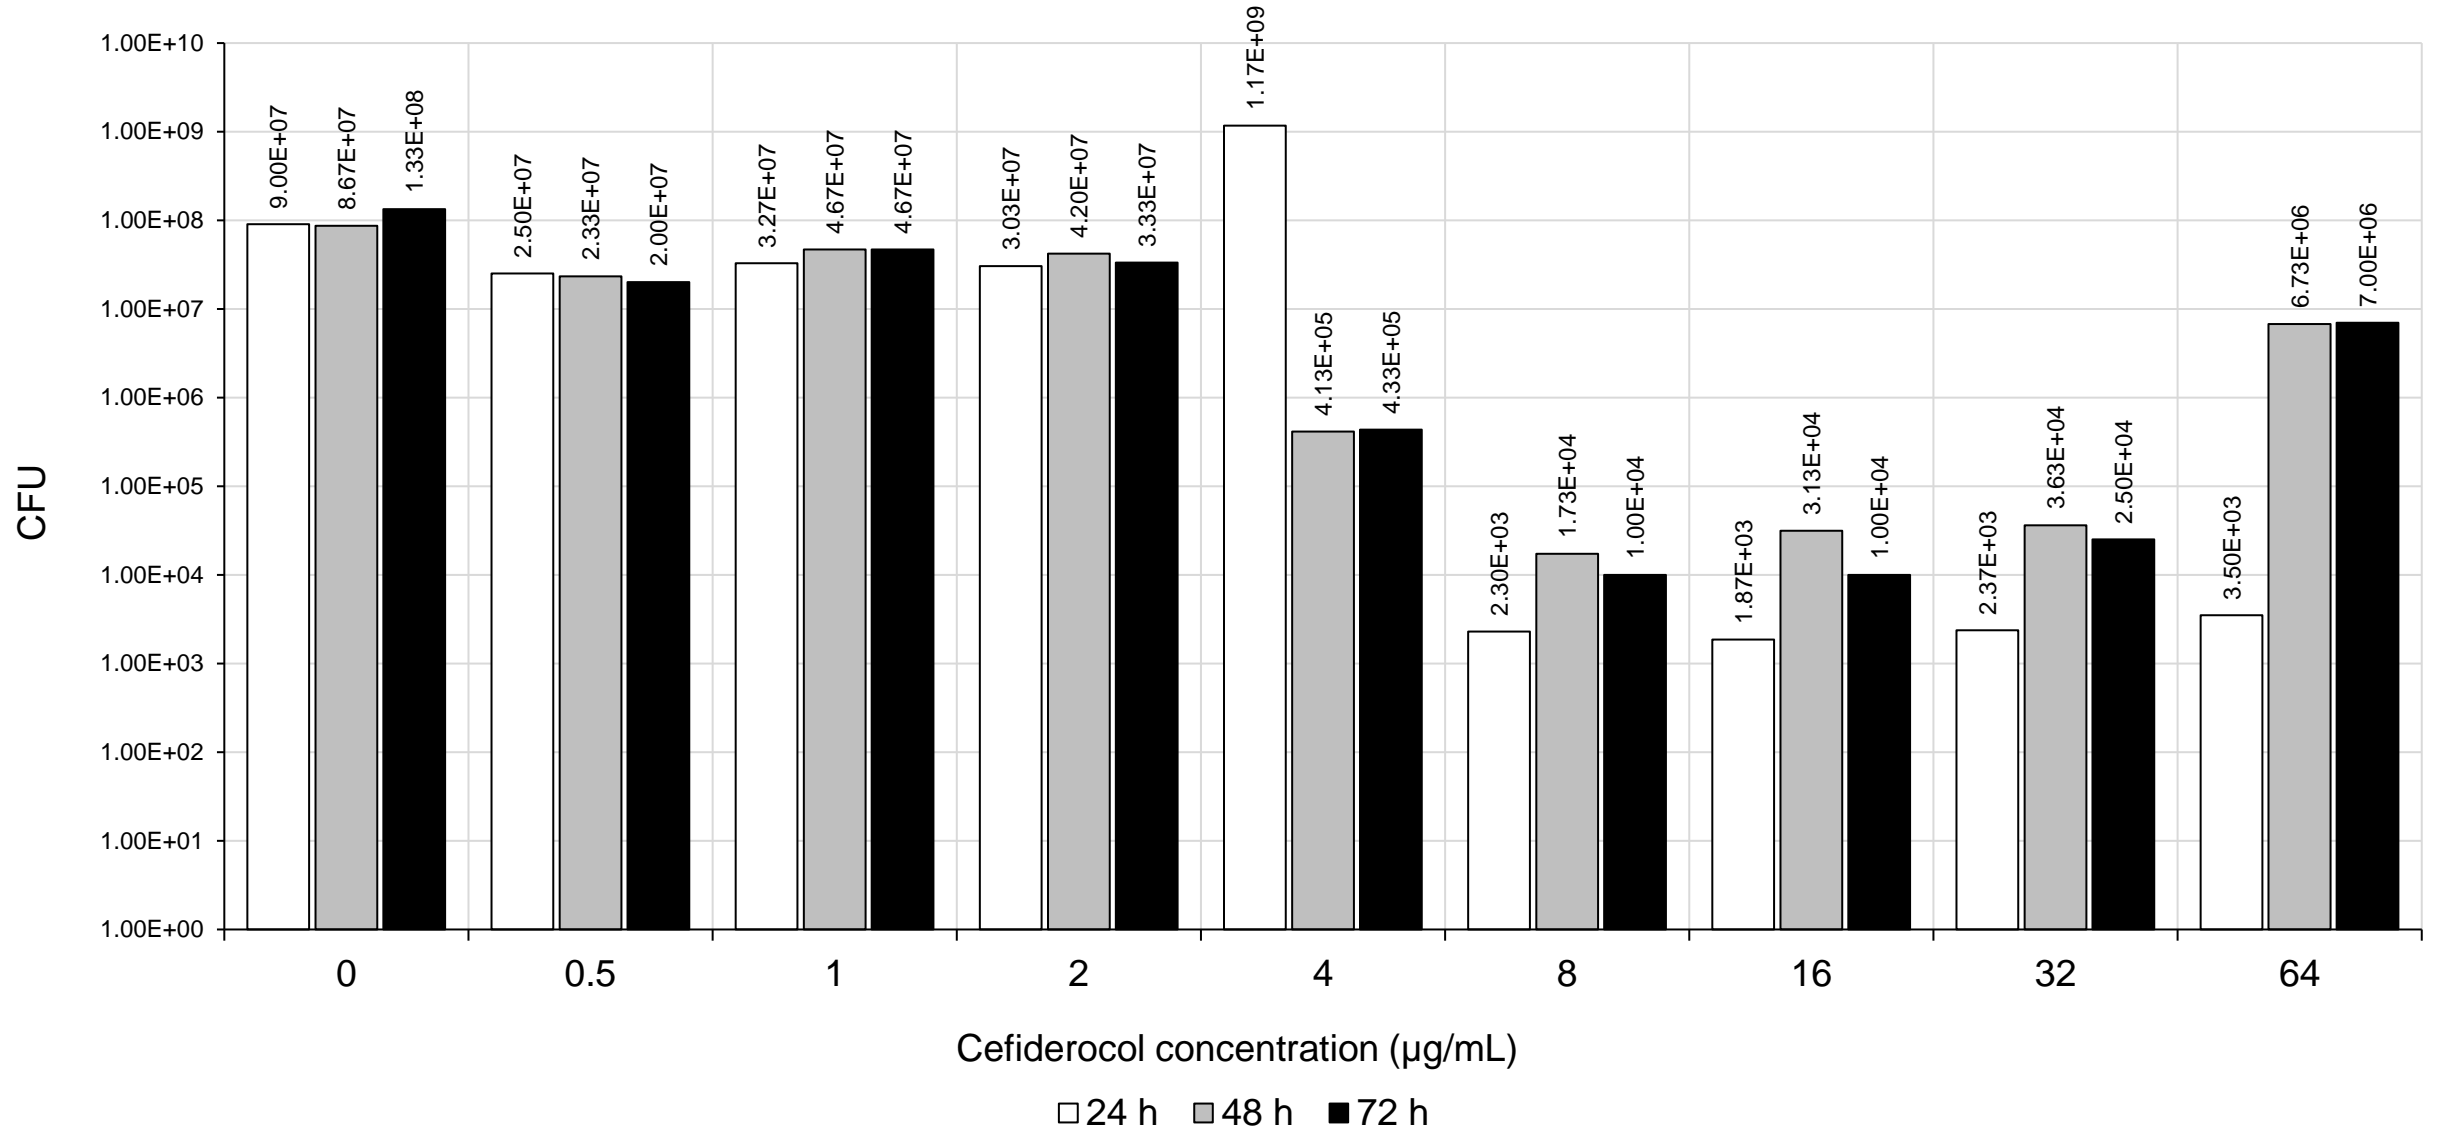

CFU, colony-forming unit; HR, heteroresistant; PAP, population analysis profiling.

Supplementary Fig S1.30.

Growth profile of carbapenem-resistant *Acinetobacter calcoaceticus-baumannii* complex by PAP method

Isolate 1921642

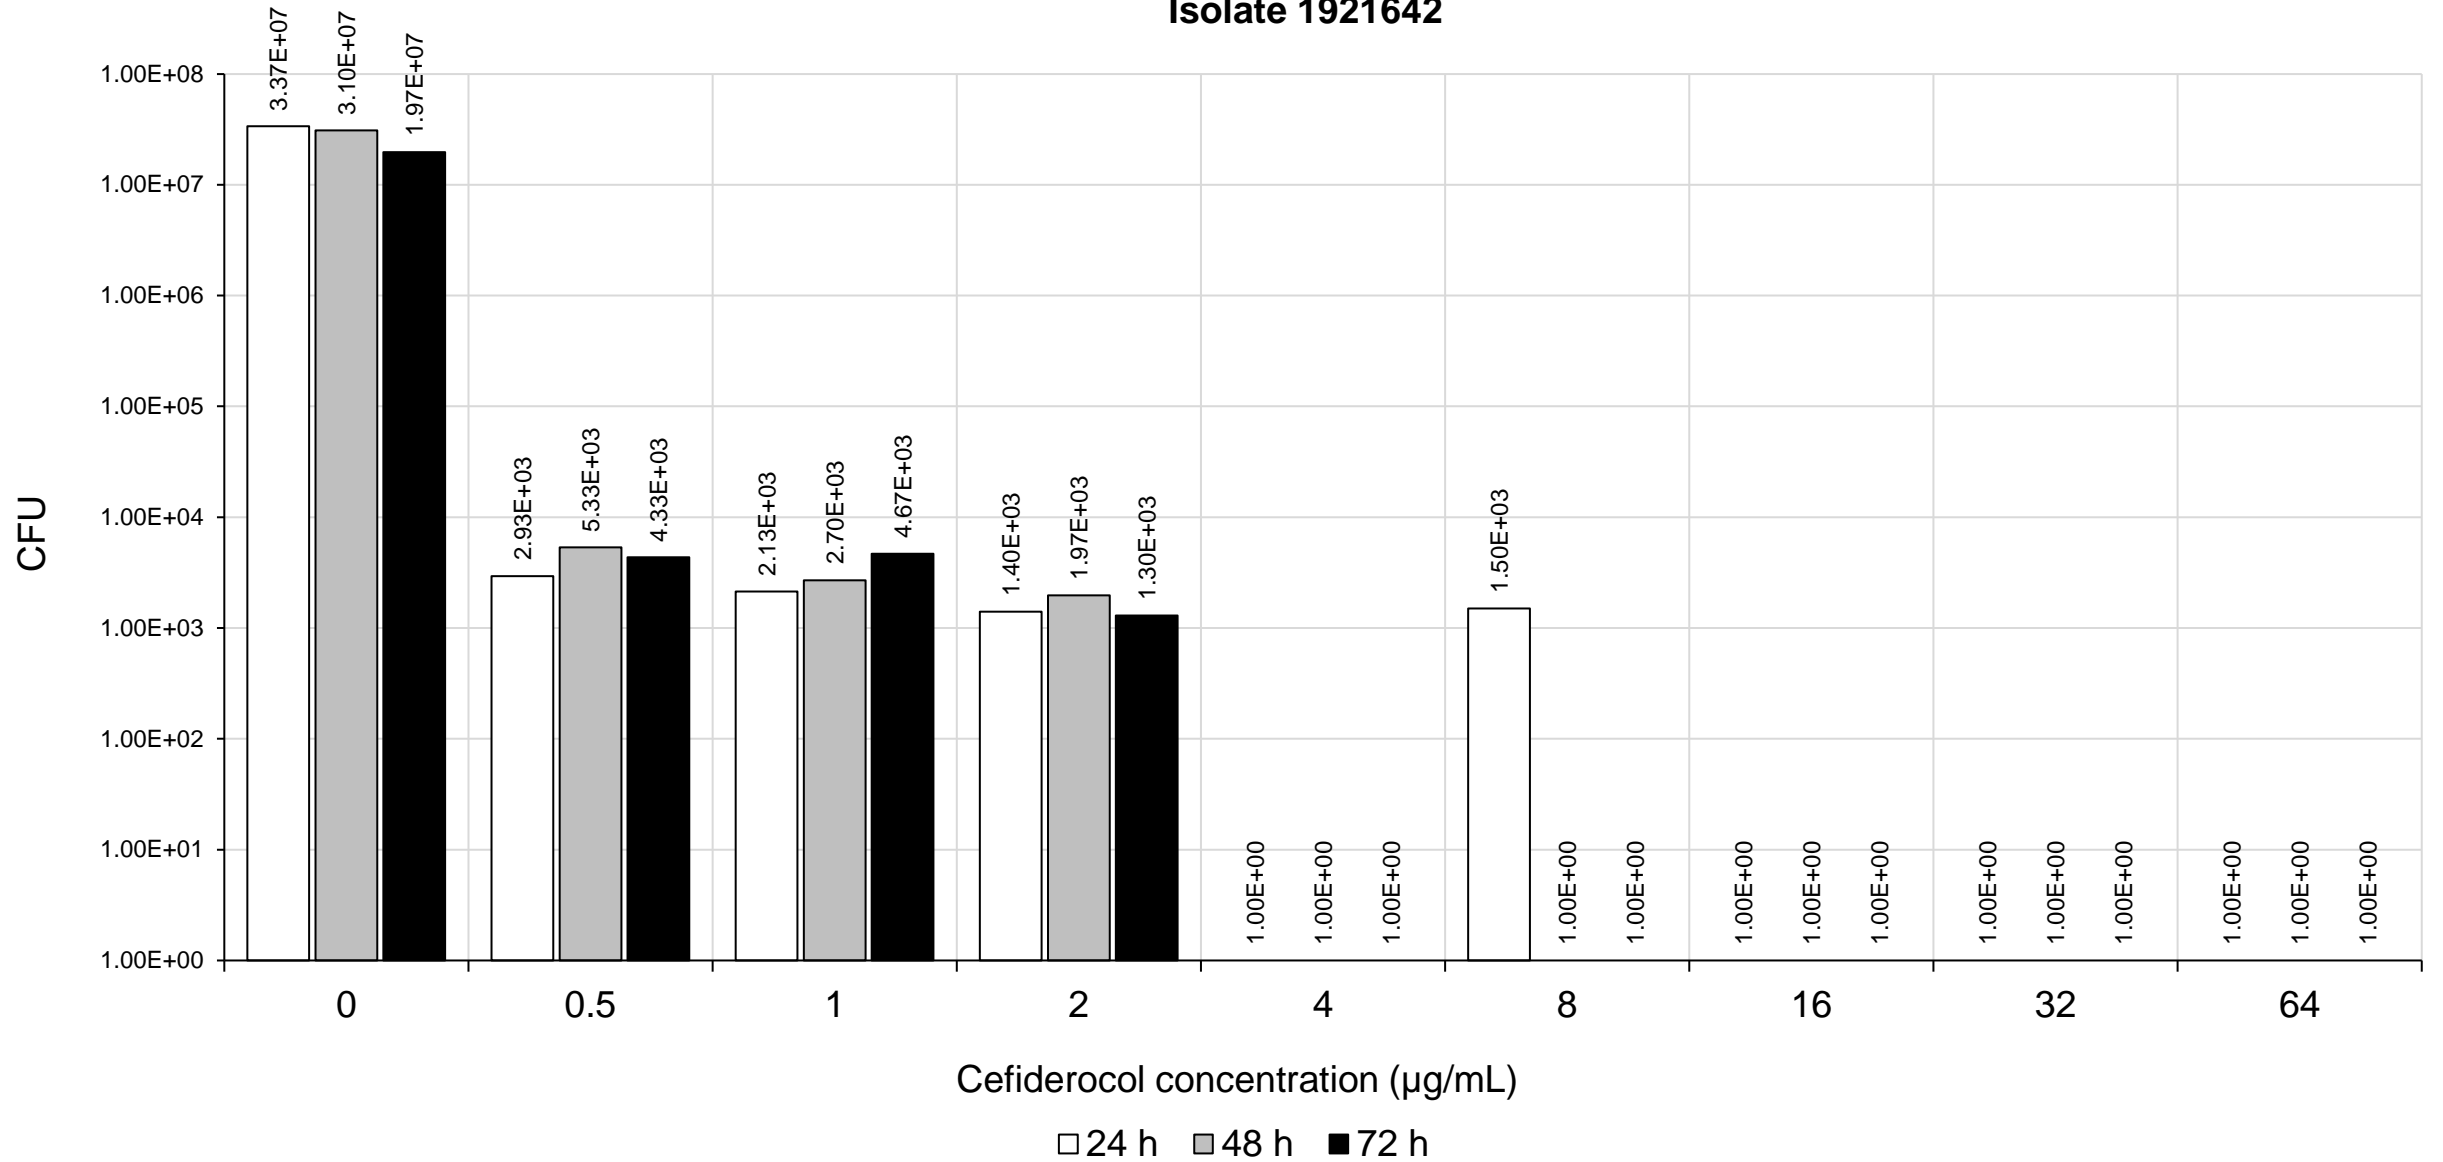

CFU, colony-forming unit; PAP, population analysis profiling; S, susceptible.

Supplementary Fig S1.31.

Growth profile of carbapenem-resistant *Acinetobacter calcoaceticus-baumannii* complex by PAP method



Isolate 1926572

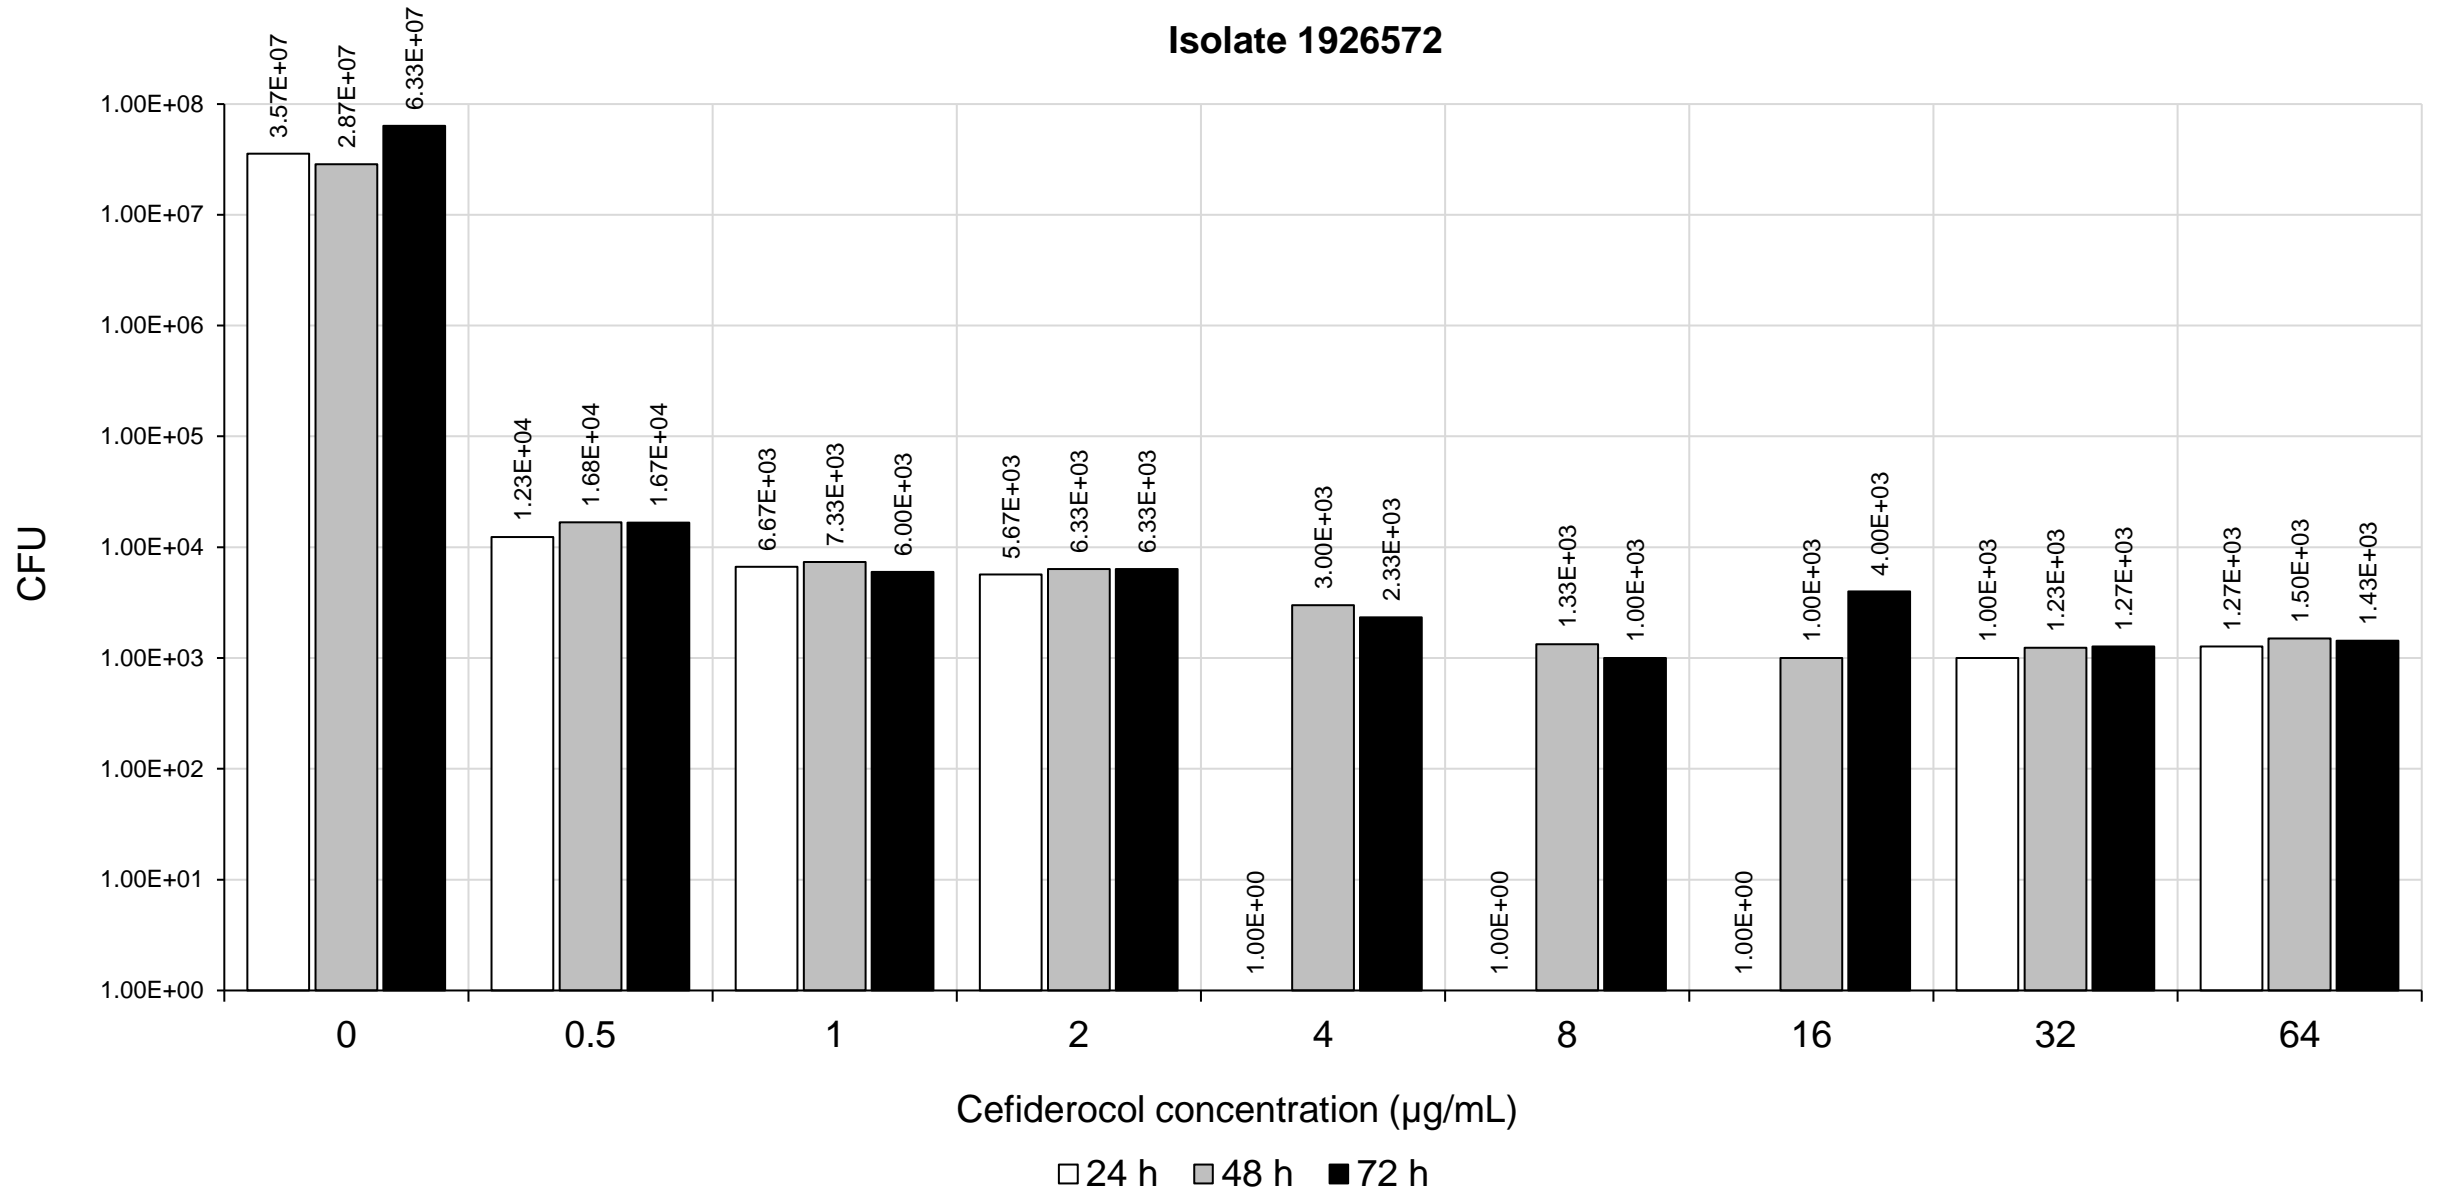

Isolate 2033917

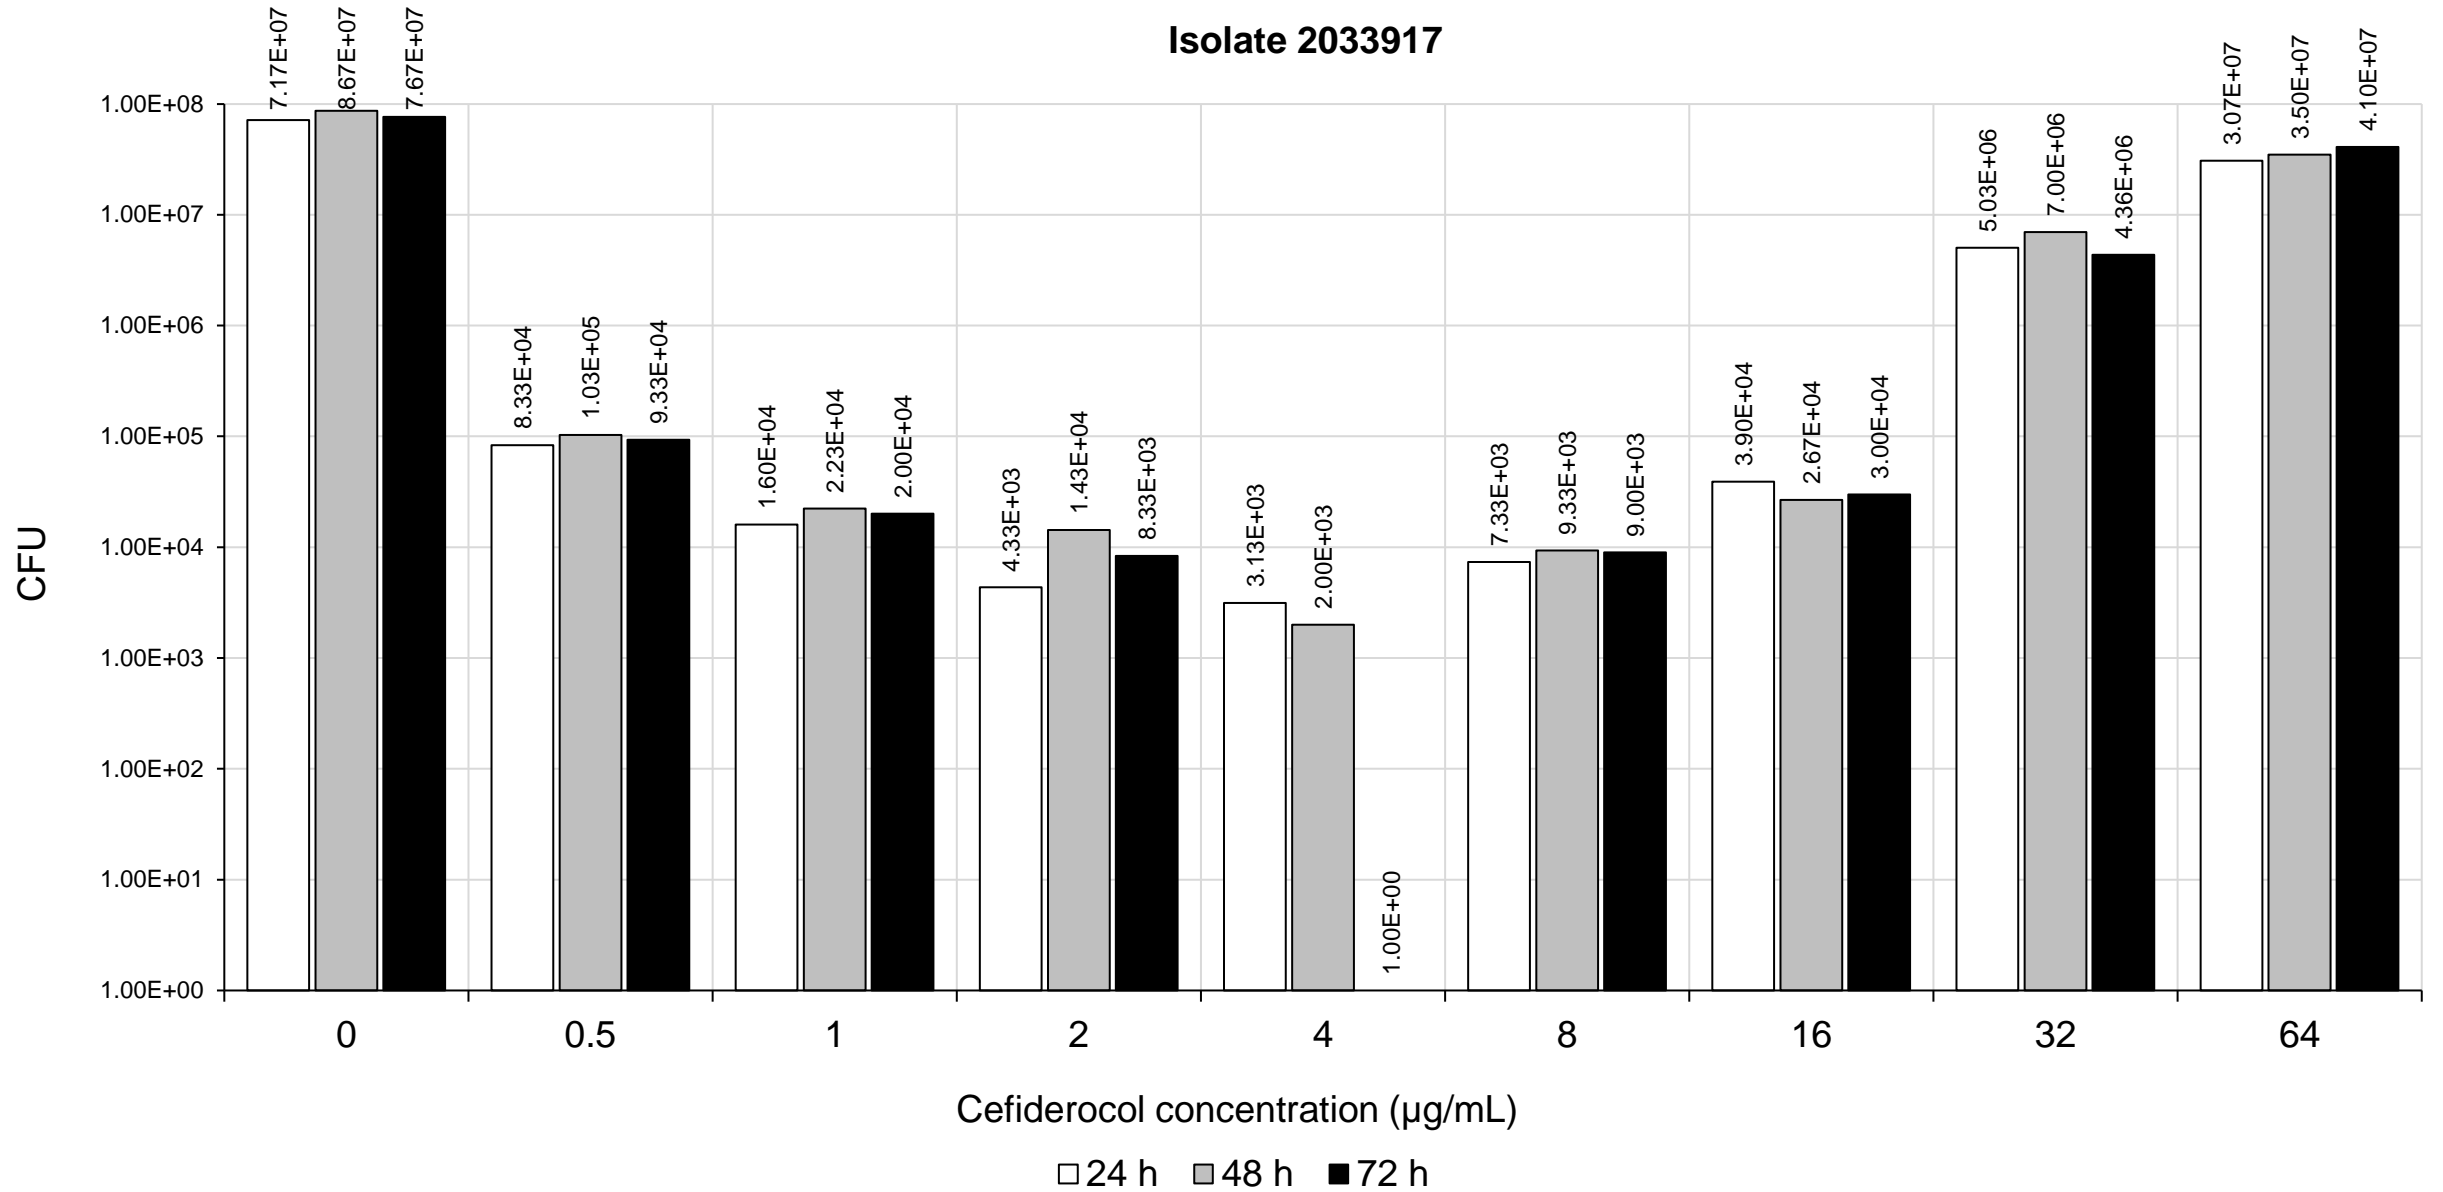

Isolate 2049186

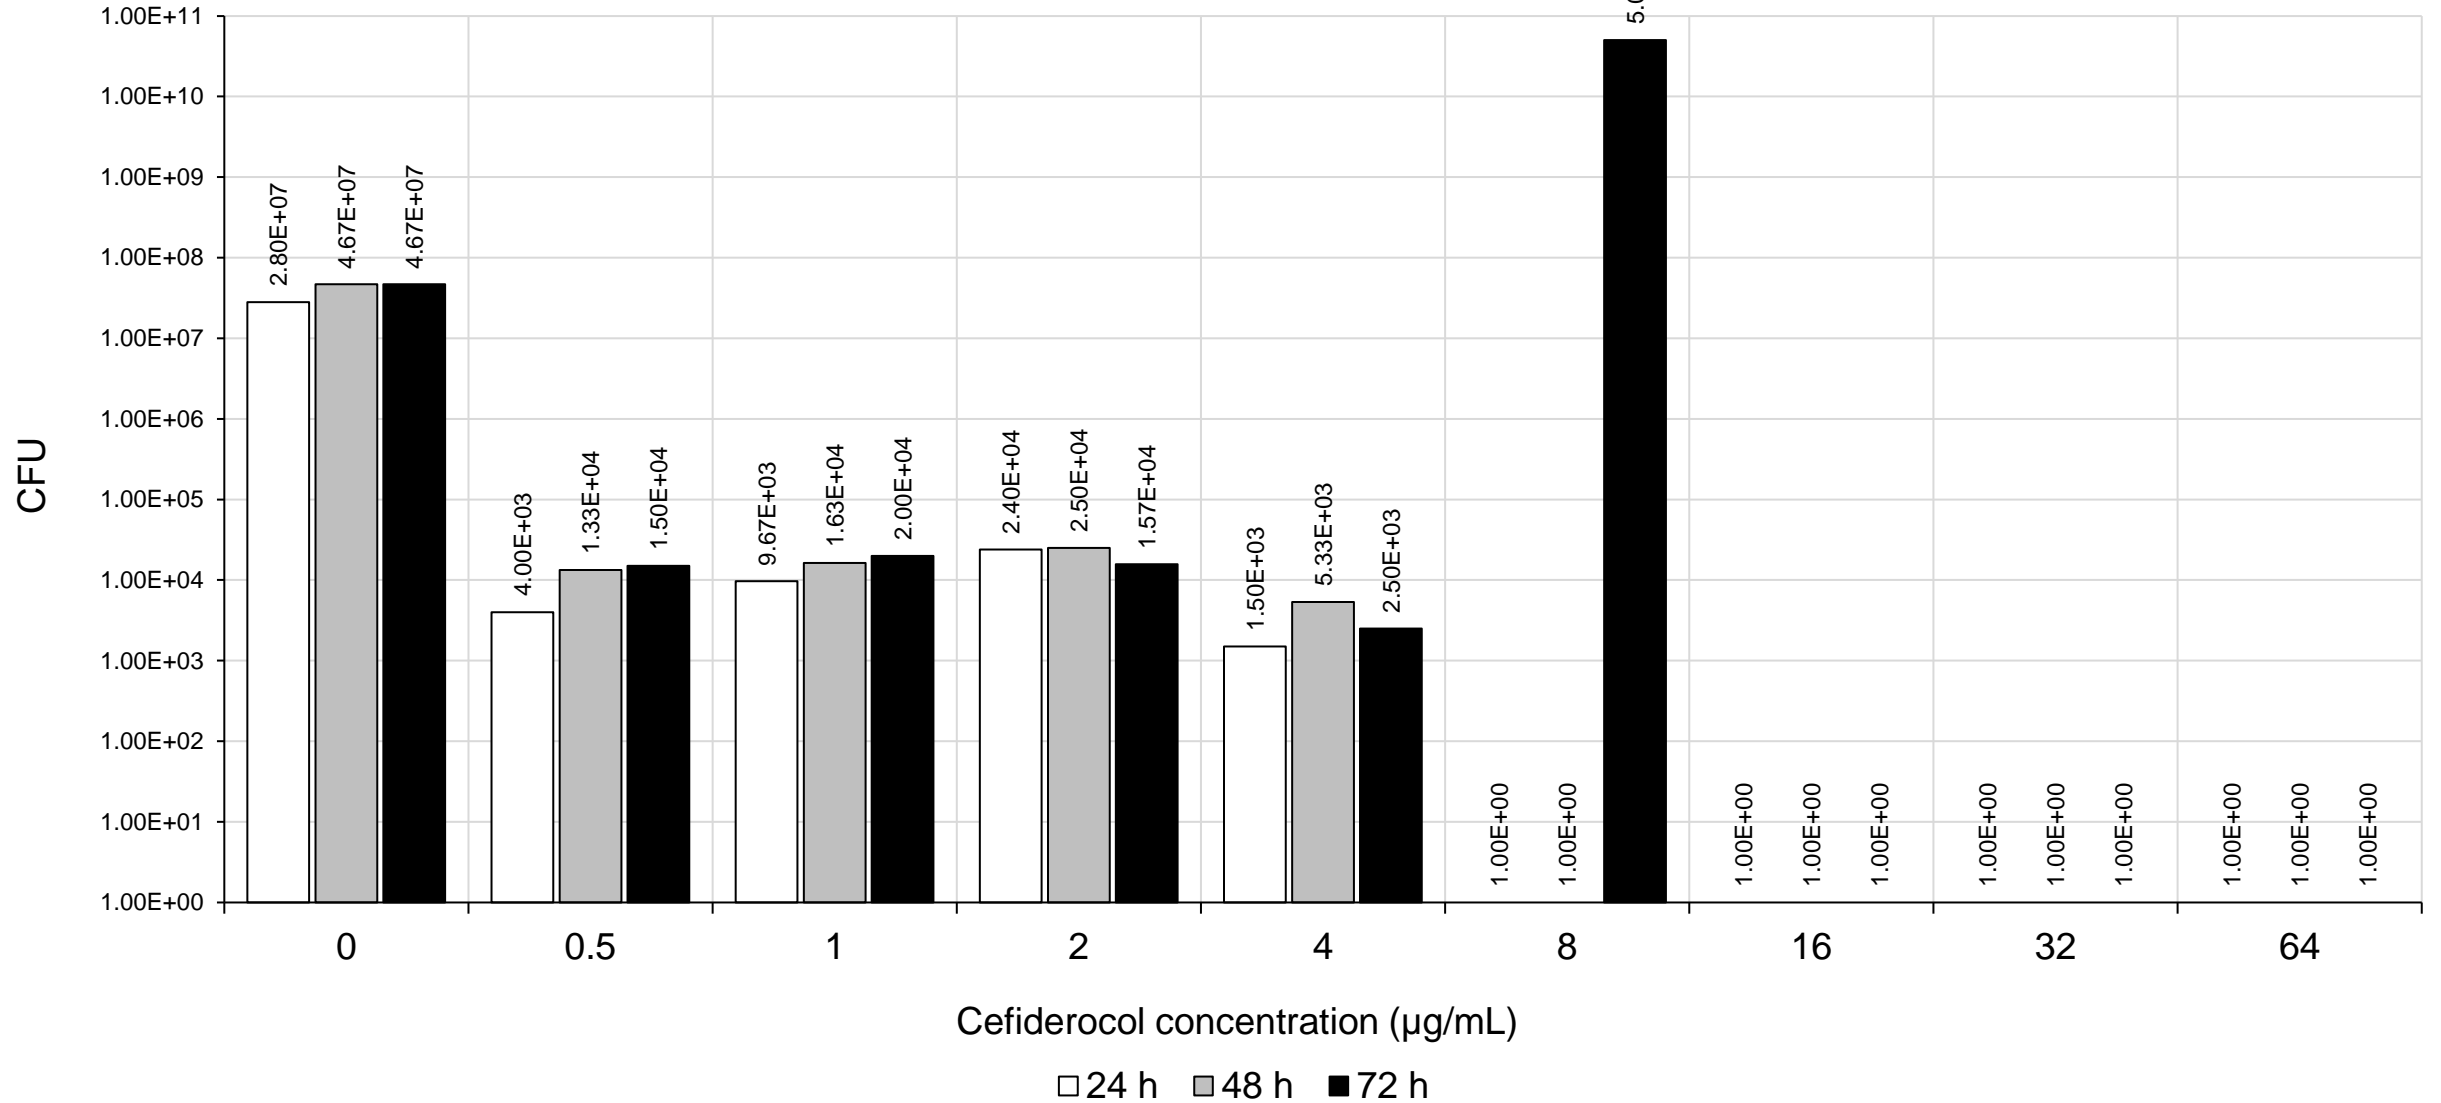

CFU, colony-forming unit; PAP, population analysis profiling; S, susceptible.

Supplementary Fig S1.34.

Growth profile of carbapenem-resistant *Acinetobacter calcoaceticus-baumannii* complex by PAP method

Isolate 2064633

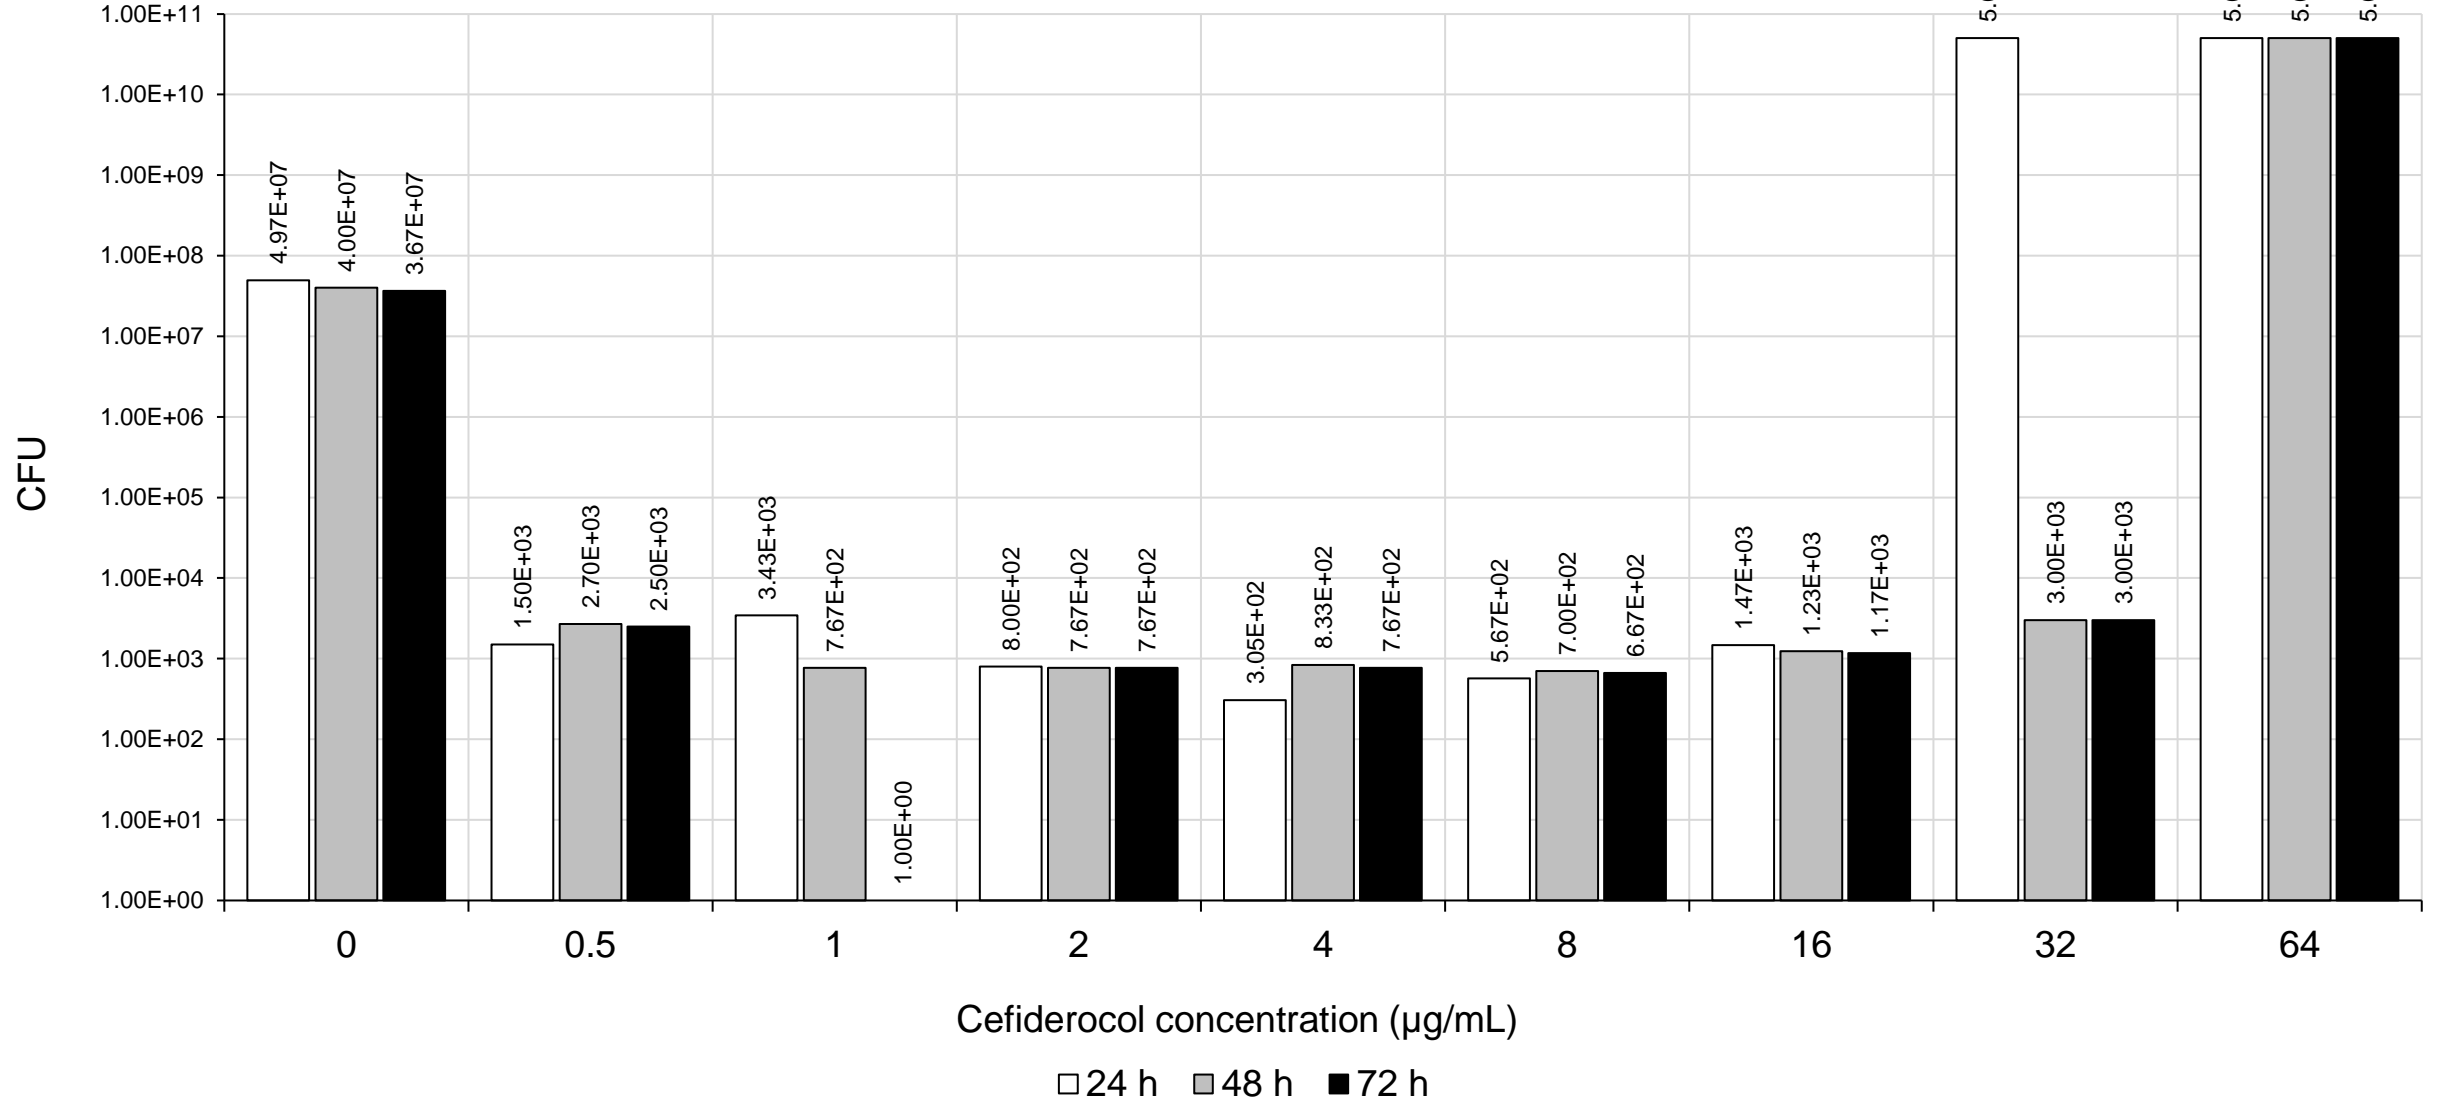

CFU, colony-forming unit; PAP, population analysis profiling; R, resistant.

Supplementary Fig S1.35.

Growth profile of carbapenem-resistant *Acinetobacter calcoaceticus-baumannii* complex by PAP method

Isolate 2064640

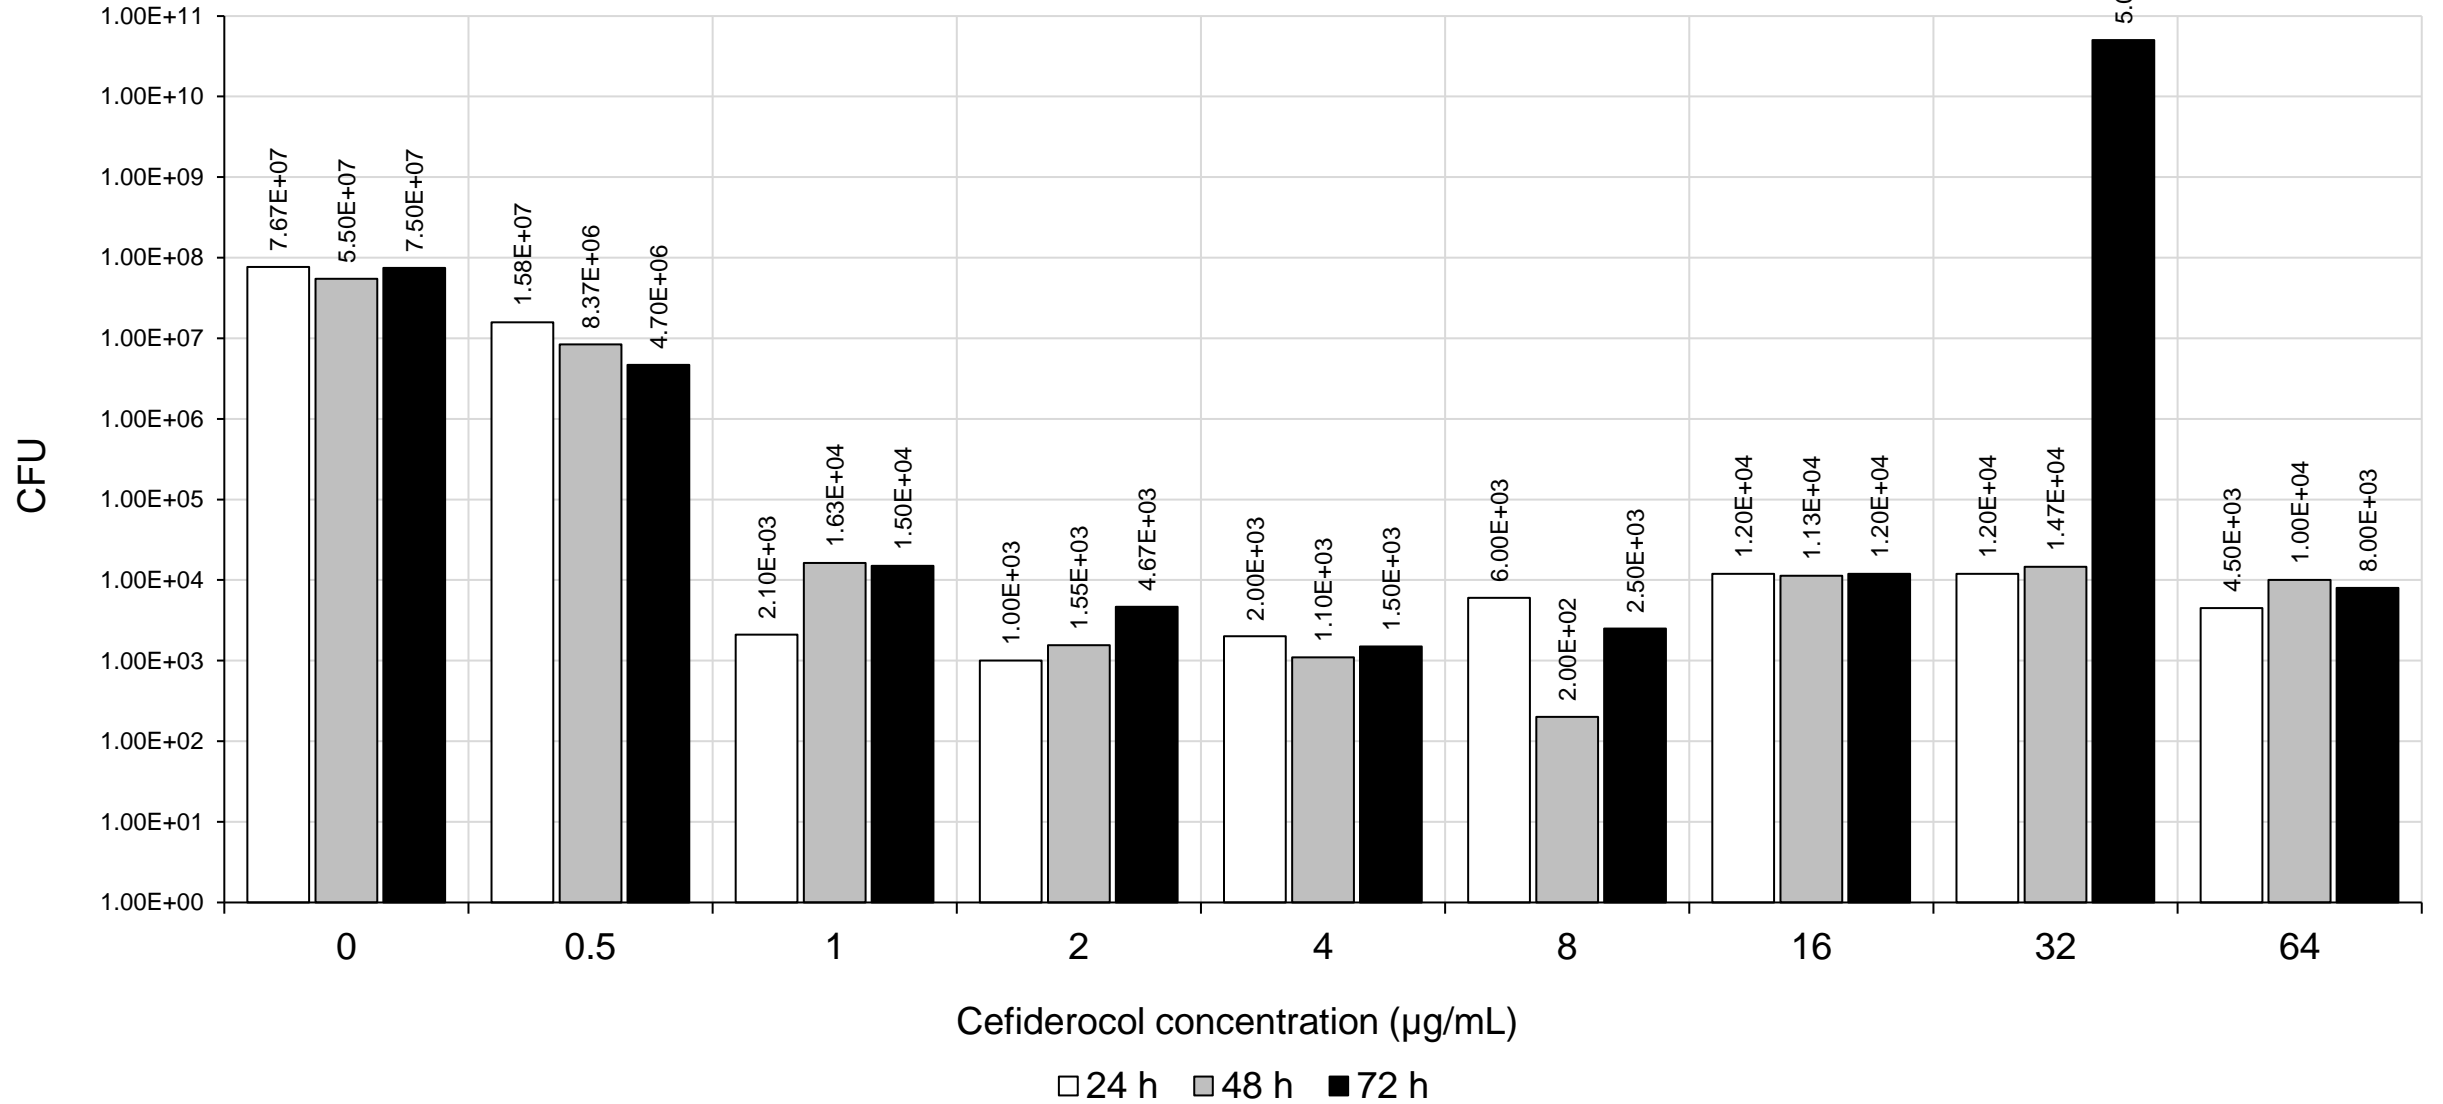

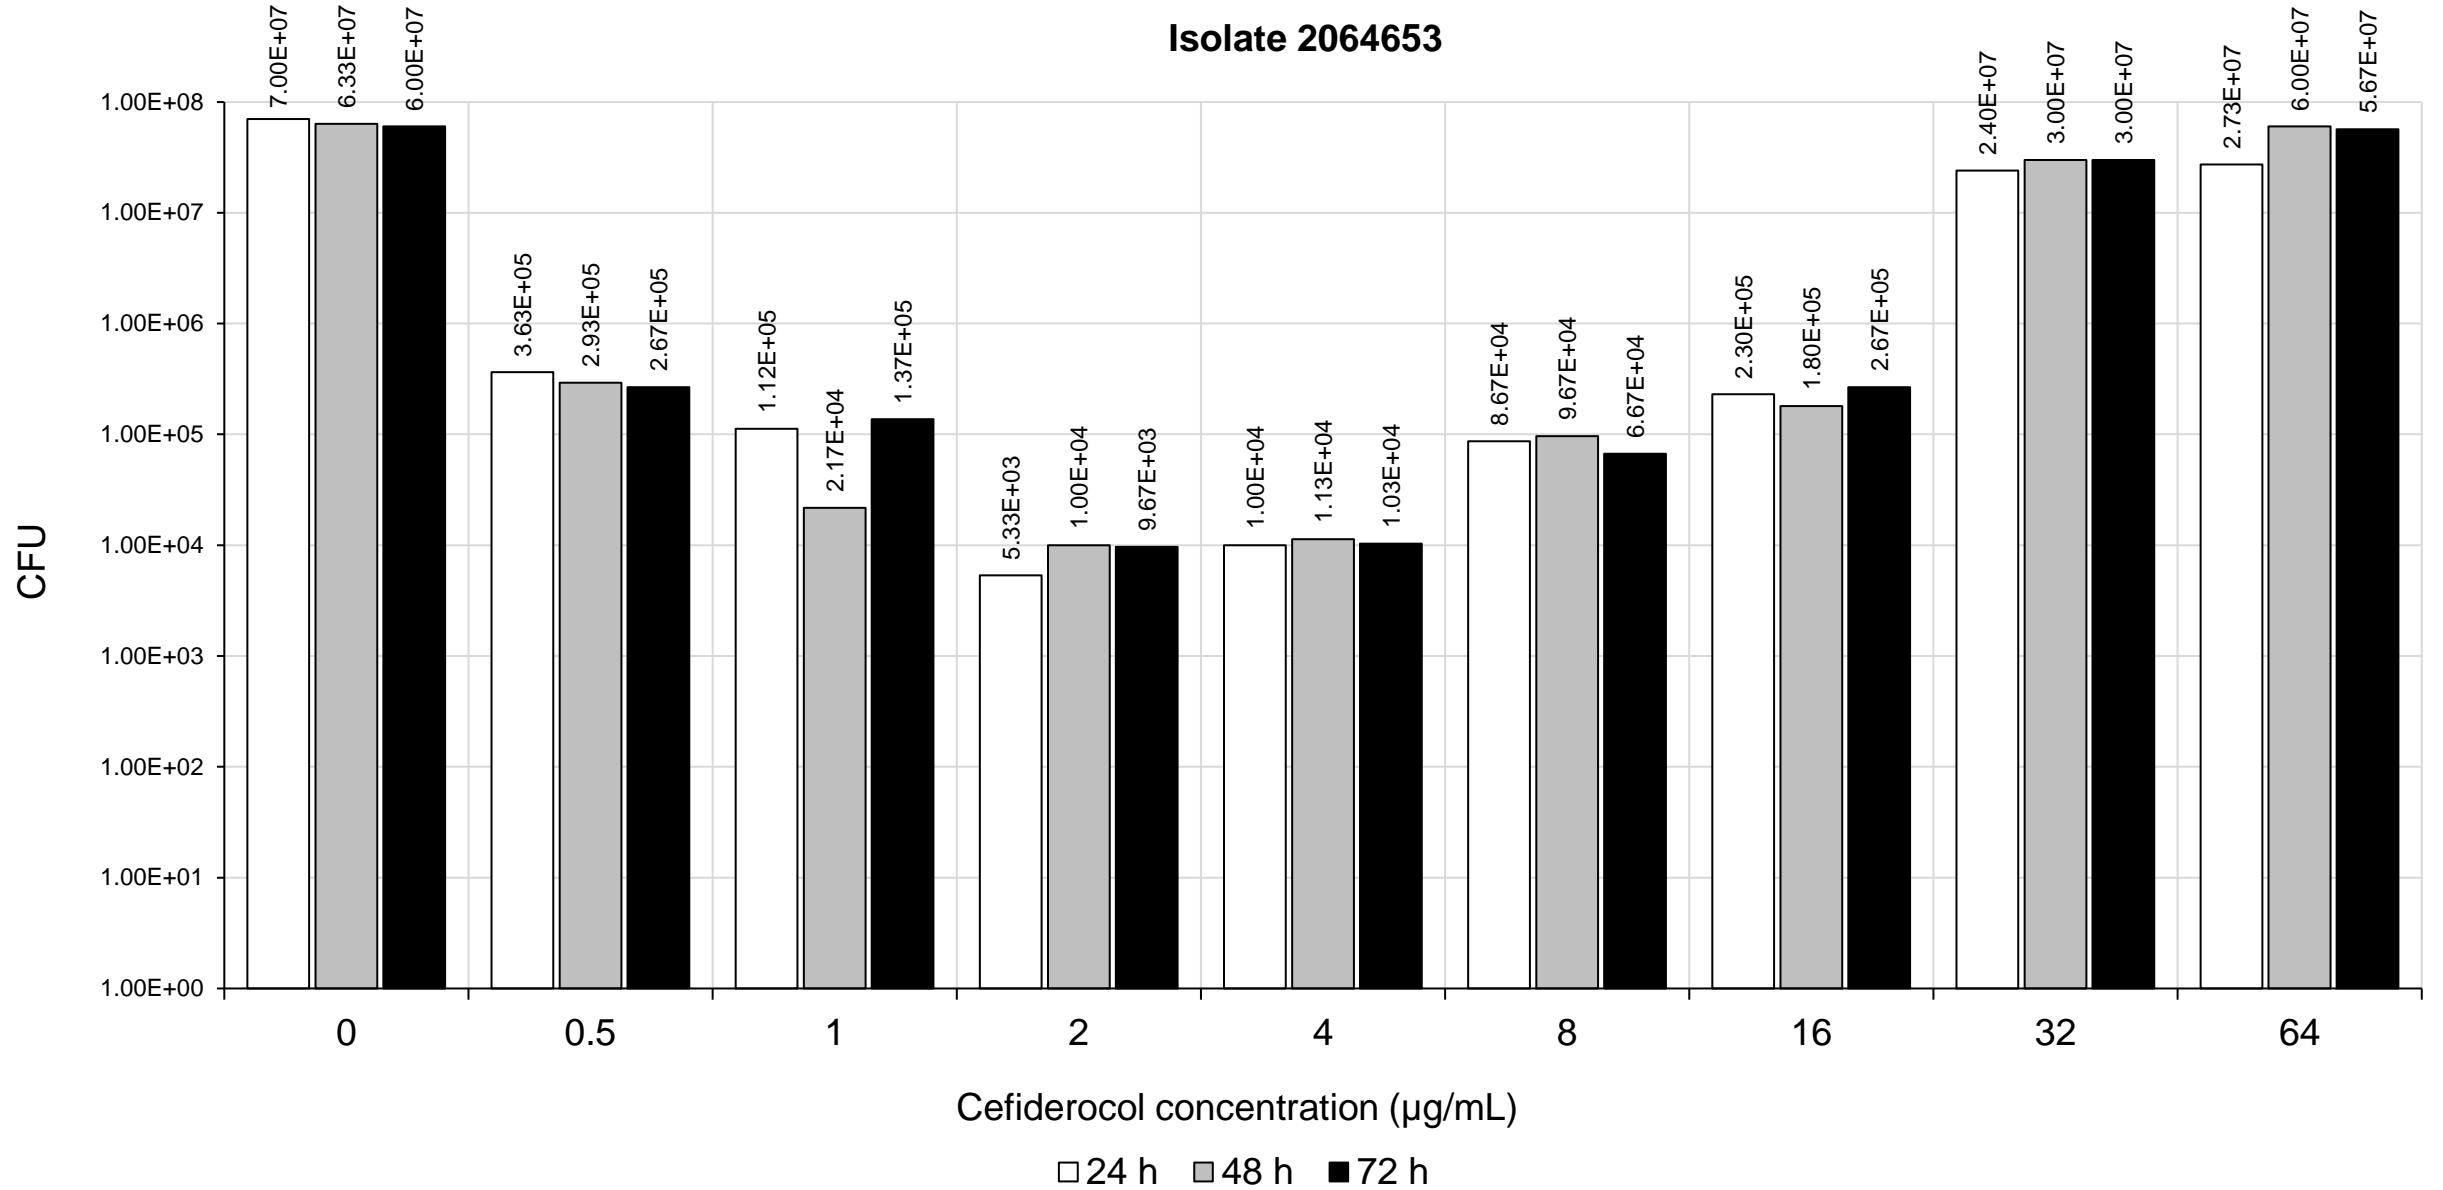

CFU, colony-forming unit; PAP, population analysis profiling; R, resistant.

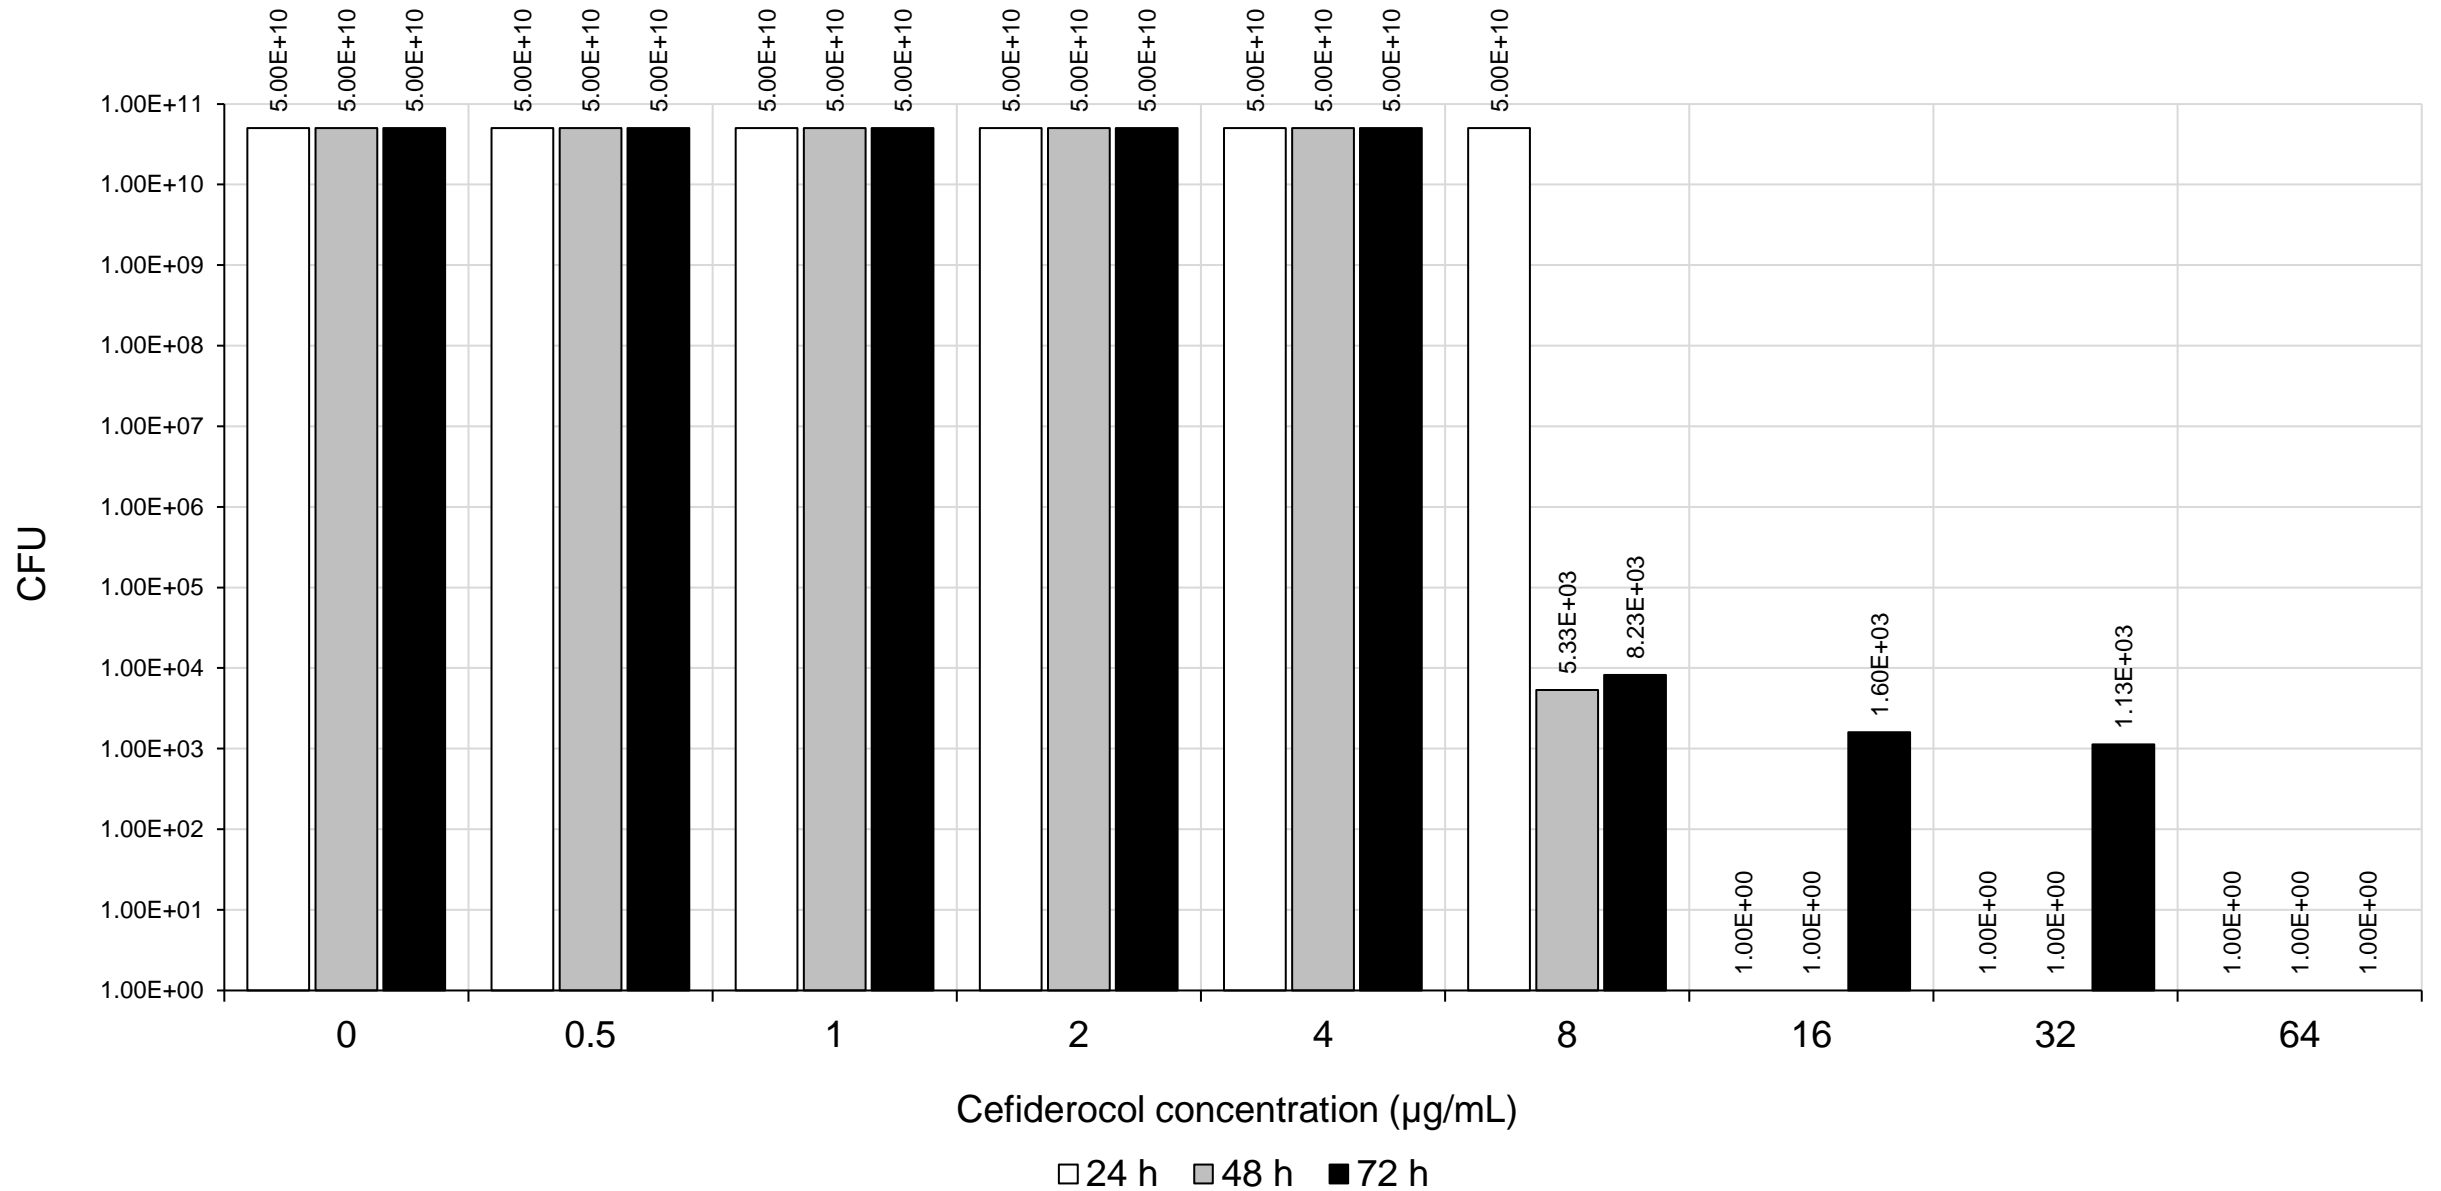

Supplement: spectrum.02371-23-s0001.pdf [file spectrum.02371-23-s0001.pdf]
