# Supplementary material for: Heteroresistance to cefiderocol in carbapenem-resistant Acinetobacter baumannii in the CREDIBLE-CR study was not linked to clinical outcomes: a post hoc analysis
Source: PubMed Central journal article supplement (PMC10714777; doi:10.1128/spectrum.02371-23), 2023-11-15
Supplement: spectrum.02371-23-s0002.pdf [file spectrum.02371-23-s0002.pdf]

**Table S1.** Clinical characteristics of patients with carbapenem-resistant *Acinetobacter calcoaceticus-baumannii* complex who died or survived by end of study in the cefiderocol arm in the CREDIBLE-CR study

|                                                       | <b>Patients with CRAB infection treated with cefiderocol in the CREDIBLE-CR study (N=38)</b> |                                              |
|-------------------------------------------------------|----------------------------------------------------------------------------------------------|----------------------------------------------|
| <b>Parameters at randomization</b>                    | <b>Patients who died by EOS<br/>n=19</b>                                                     | <b>Patients who survived by EOS<br/>n=19</b> |
| <b>Age</b>                                            |                                                                                              |                                              |
| Mean (SD)                                             | 64.0 (17.1)                                                                                  | 54.5 (23.8)                                  |
| Median (range [min–max])                              | 69 (24–86)                                                                                   | 67 (23–91)                                   |
| <b>Sex</b>                                            |                                                                                              |                                              |
| Male, n (%)                                           | 11 (57.8)                                                                                    | 13 (68.4)                                    |
| Female, n (%)                                         | 8 (42.2)                                                                                     | 6 (31.6)                                     |
| <b>ICU, n (%)</b>                                     | 16 (84.2)                                                                                    | 16 (84.2)                                    |
| <b>Mechanical ventilation, n (%)</b>                  | 15 (78.9)                                                                                    | 12 (63.2)                                    |
| <b>APACHE II</b>                                      |                                                                                              |                                              |
| Mean (SD)                                             | 18.6 (5.6)                                                                                   | 15.1 (6.0)                                   |
| Median (range [min–max])                              | 18 (12–29)                                                                                   | 15 (5–26)                                    |
| <b>SOFA</b>                                           |                                                                                              |                                              |
| Mean (SD)                                             | 7.7 (3.9)                                                                                    | 5.3 (3.4)                                    |
| Median (range [min–max])                              | 7 (3–17)                                                                                     | 4 (1–12)                                     |
| <b>CCI</b>                                            |                                                                                              |                                              |
| Mean (SD)                                             | 7.0 (2.5)                                                                                    | 3.4 (2.3)                                    |
| Median (range [min–max])                              | 7 (3–11)                                                                                     | 4 (0–7)                                      |
| <b>Severe/moderate renal impairment,* n (%)</b>       | 9 (47.4)                                                                                     | 3 (15.8)                                     |
| <b>Any organ failure,** n (%)</b>                     | 15 (78.9)                                                                                    | 7 (36.8)                                     |
| <b>Ongoing or prior (within 31 days) septic shock</b> | 8 (42.1)                                                                                     | 1 (5.3)                                      |
| <b>Sepsis without septic shock</b>                    | 2 (10.5)                                                                                     | 0 (0)                                        |

APACHE II, Acute Physiology And Chronic Health Evaluation II; CCI, Charlson Comorbidity Index; CRAB, carbapenem-resistant *Acinetobacter calcoaceticus-baumannii* complex; EOS, end of study; ICU, intensive care unit; SD, standard deviation; SOFA, Sequential Organ Failure Assessment.

\*Based on creatinine clearance [1].

\*\*Includes any acute or chronic renal, lung, liver, and/or cardiac failure or insufficiency reported in medical history prior to randomization.

## Reference

1. Bassetti M, Echols R, Matsunaga Y, Ariyasu M, Doi Y, Ferrer R, Lodise TP, Naas T, Niki Y, Paterson DL, Portsmouth S, Torre-Cisneros J, Toyozumi K, Wunderink RG, Nagata TD. 2021. Efficacy and safety of cefiderocol or best available therapy for the treatment of serious infections caused by carbapenem-resistant Gram-negative bacteria (CREDIBLE-CR): a randomised, open-label, multicentre, pathogen-focused, descriptive, phase 3 trial. *Lancet Infect Dis* 21:226–240.
